# Supplementary material for: Contrasting action and posture coding with hierarchical deep neural network models of proprioception
Source: eLife journal article supplement (doi:10.7554/elife.81499), 2023-05-31

**A**

Horizontal Invariance

Spatial-Temporal

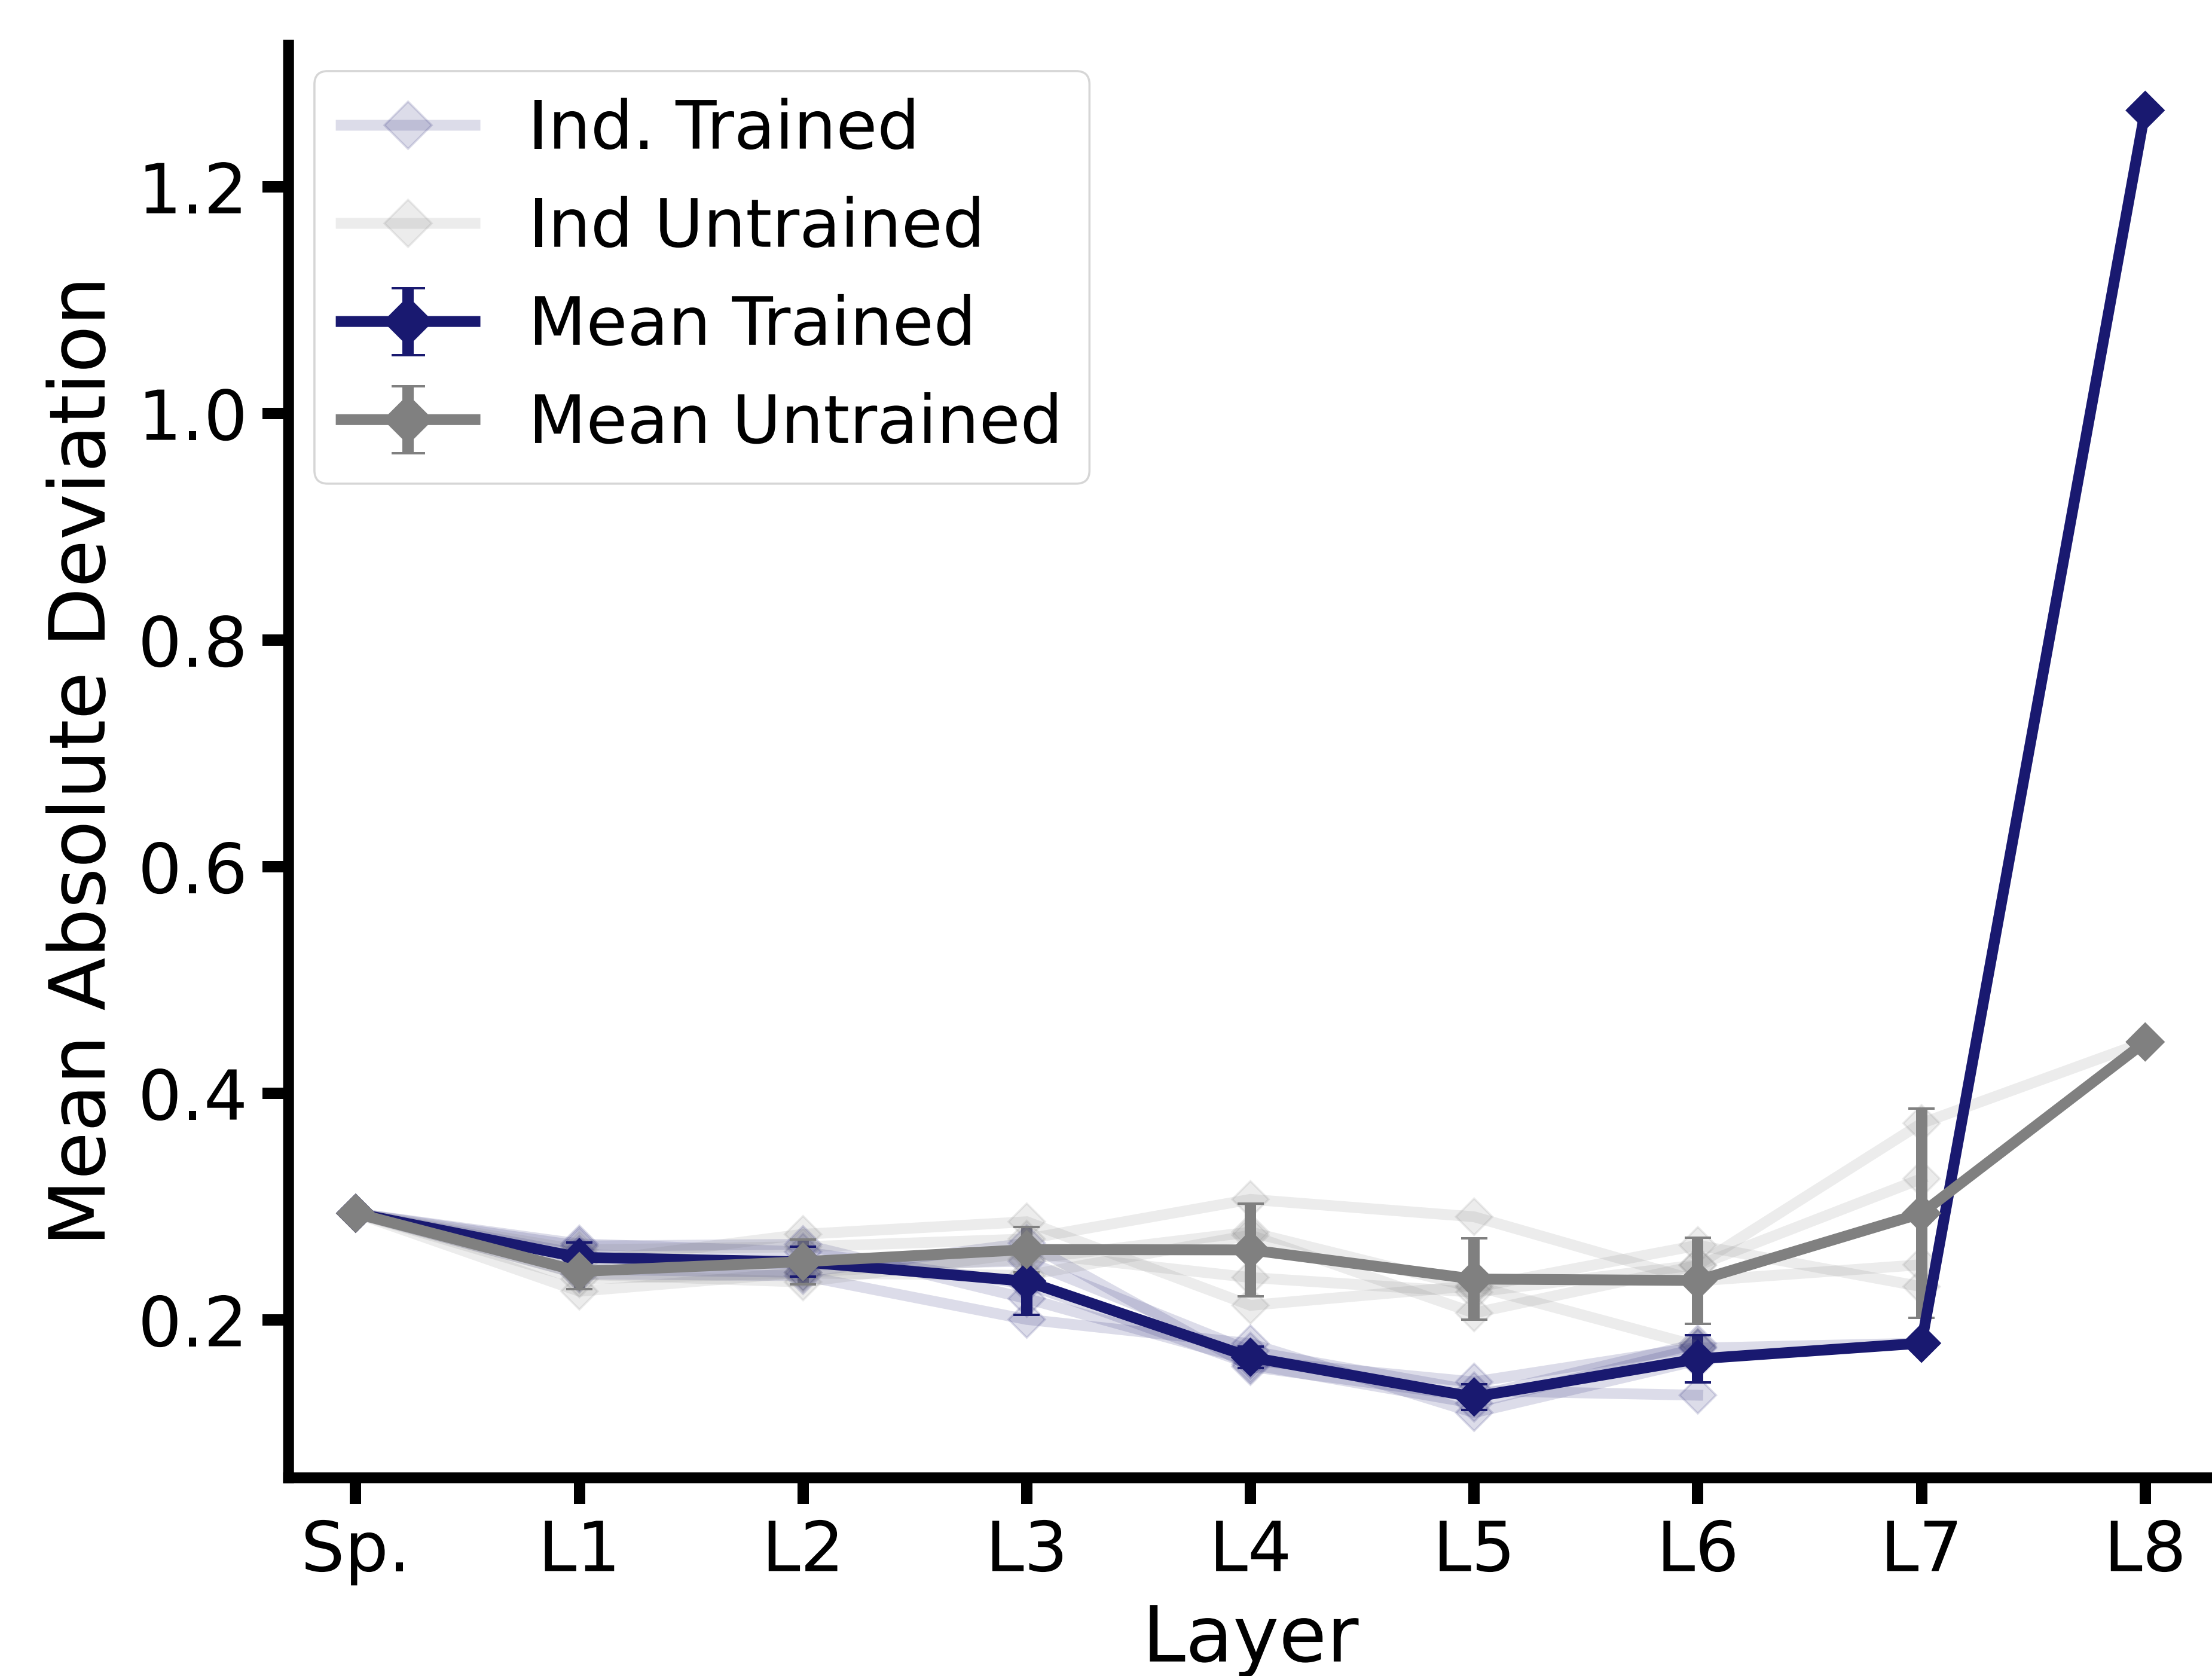

Spatiotemporal

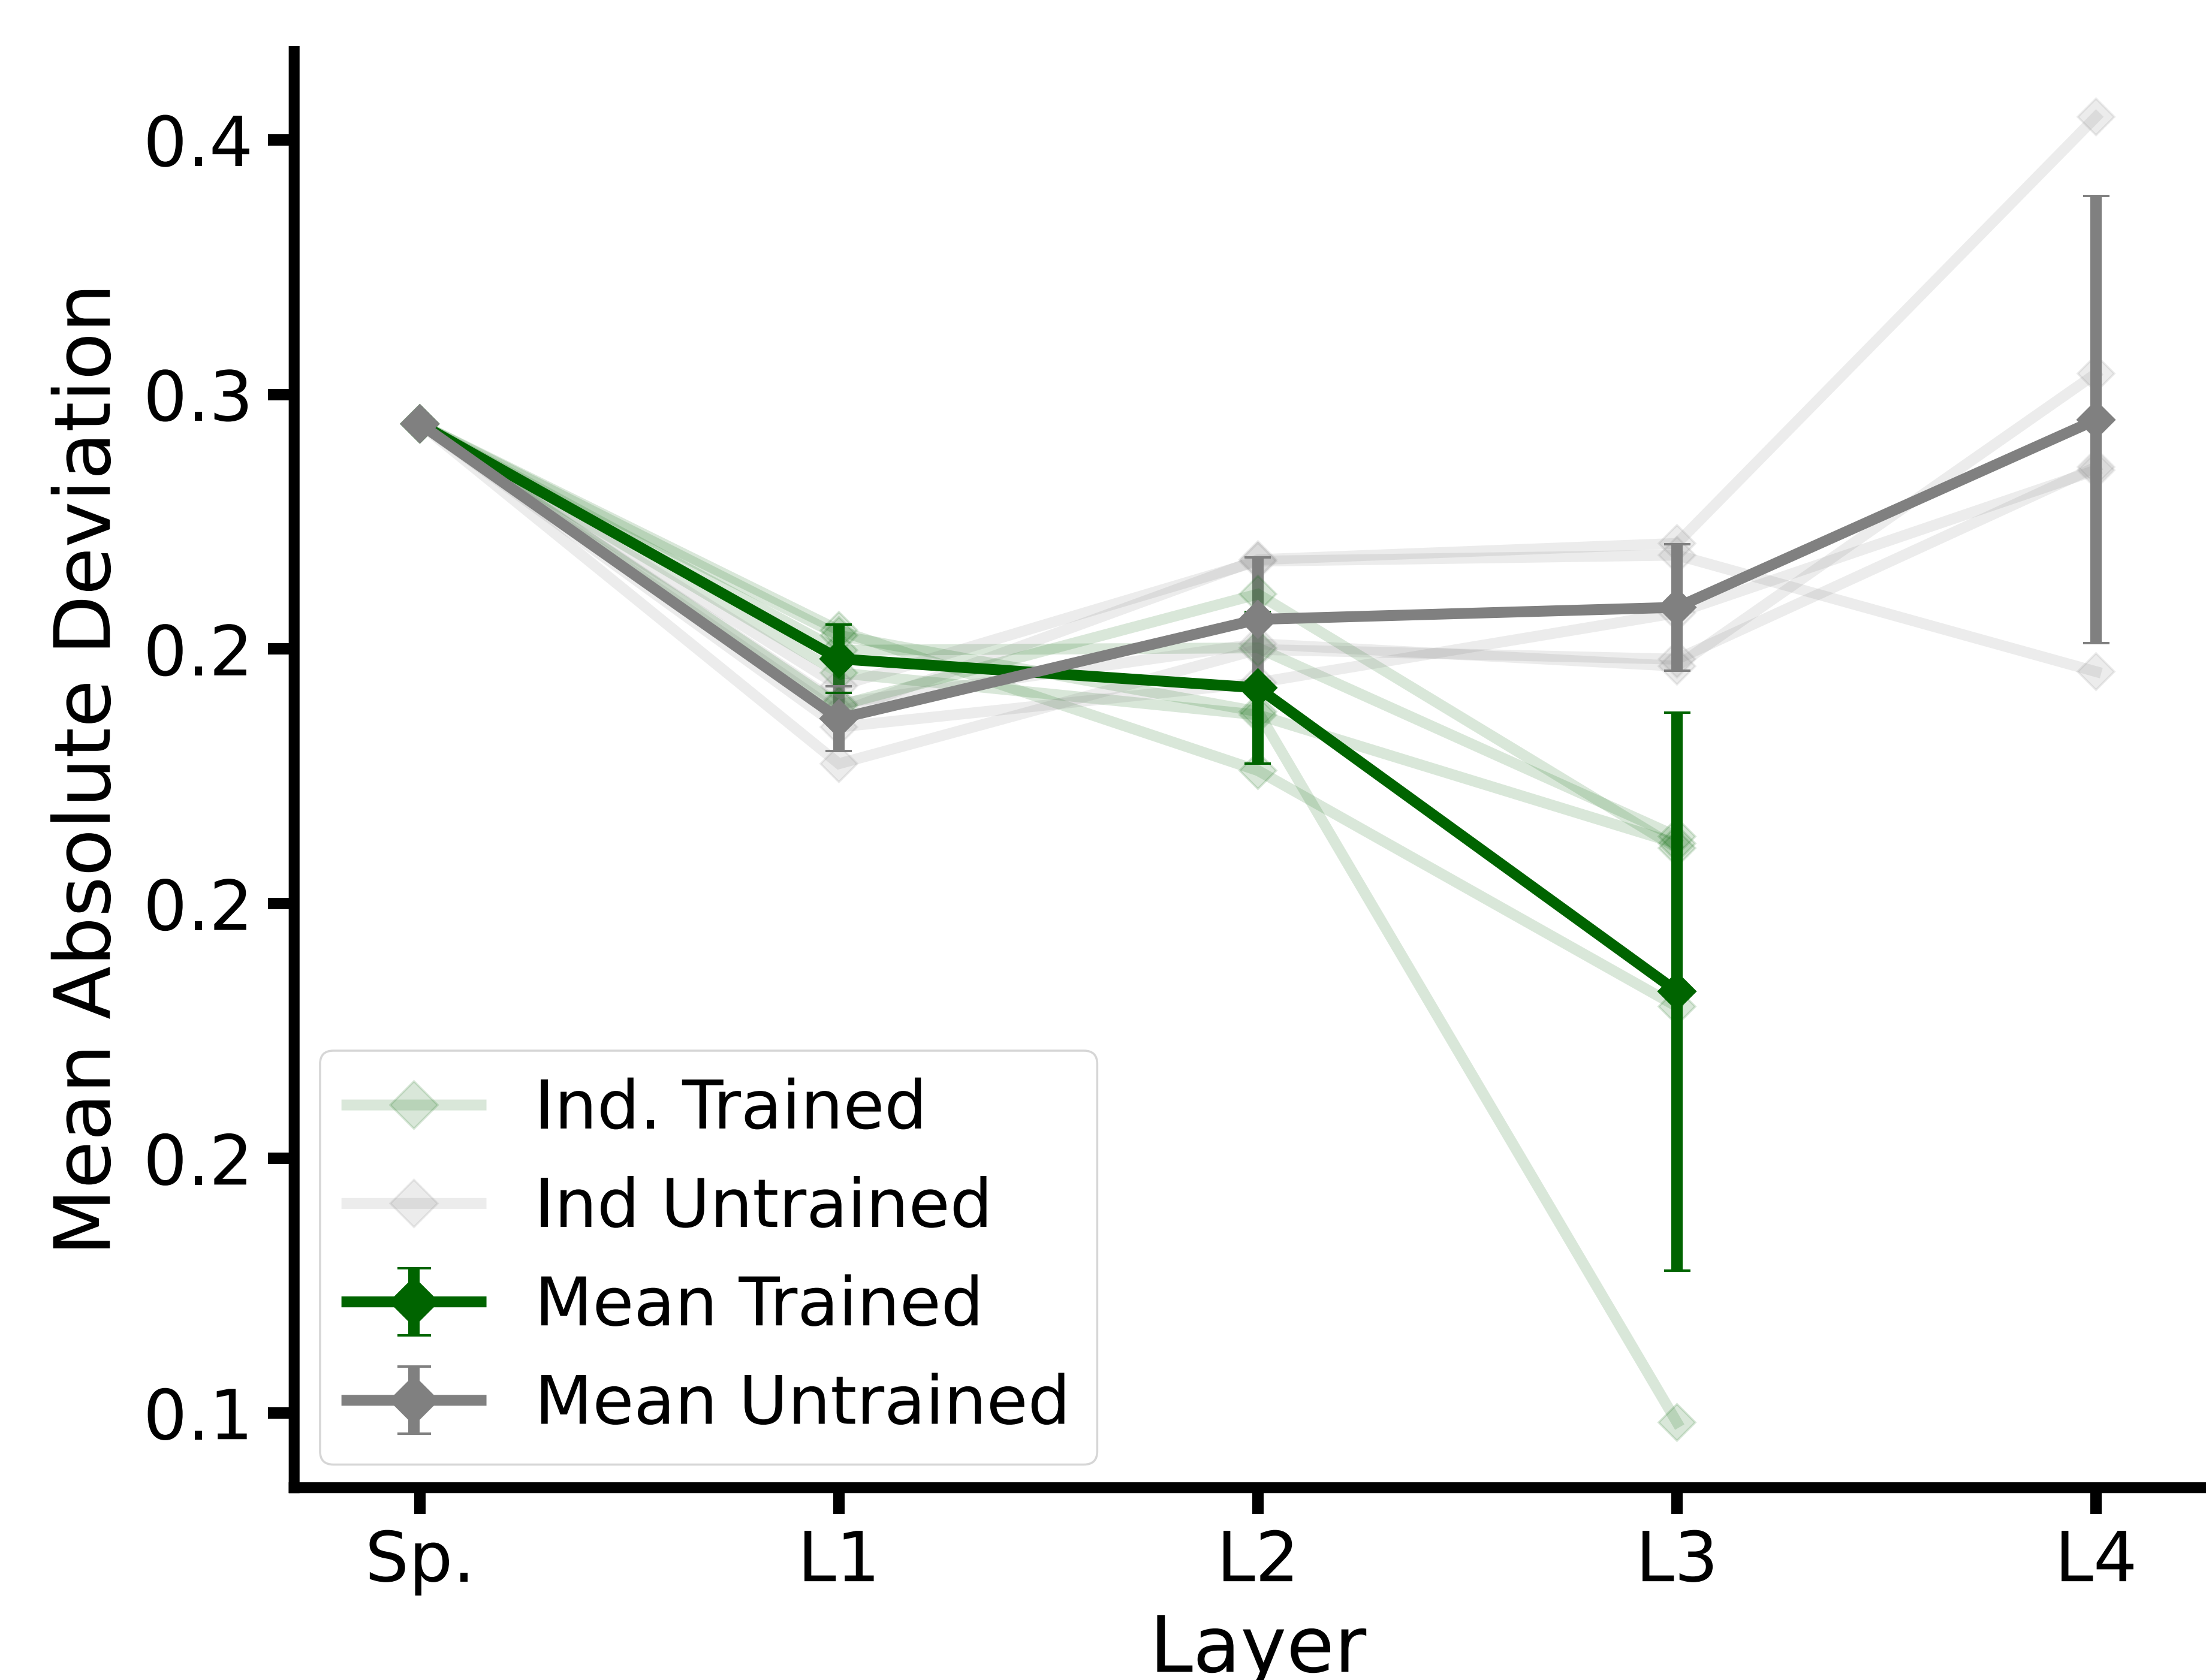

LSTM

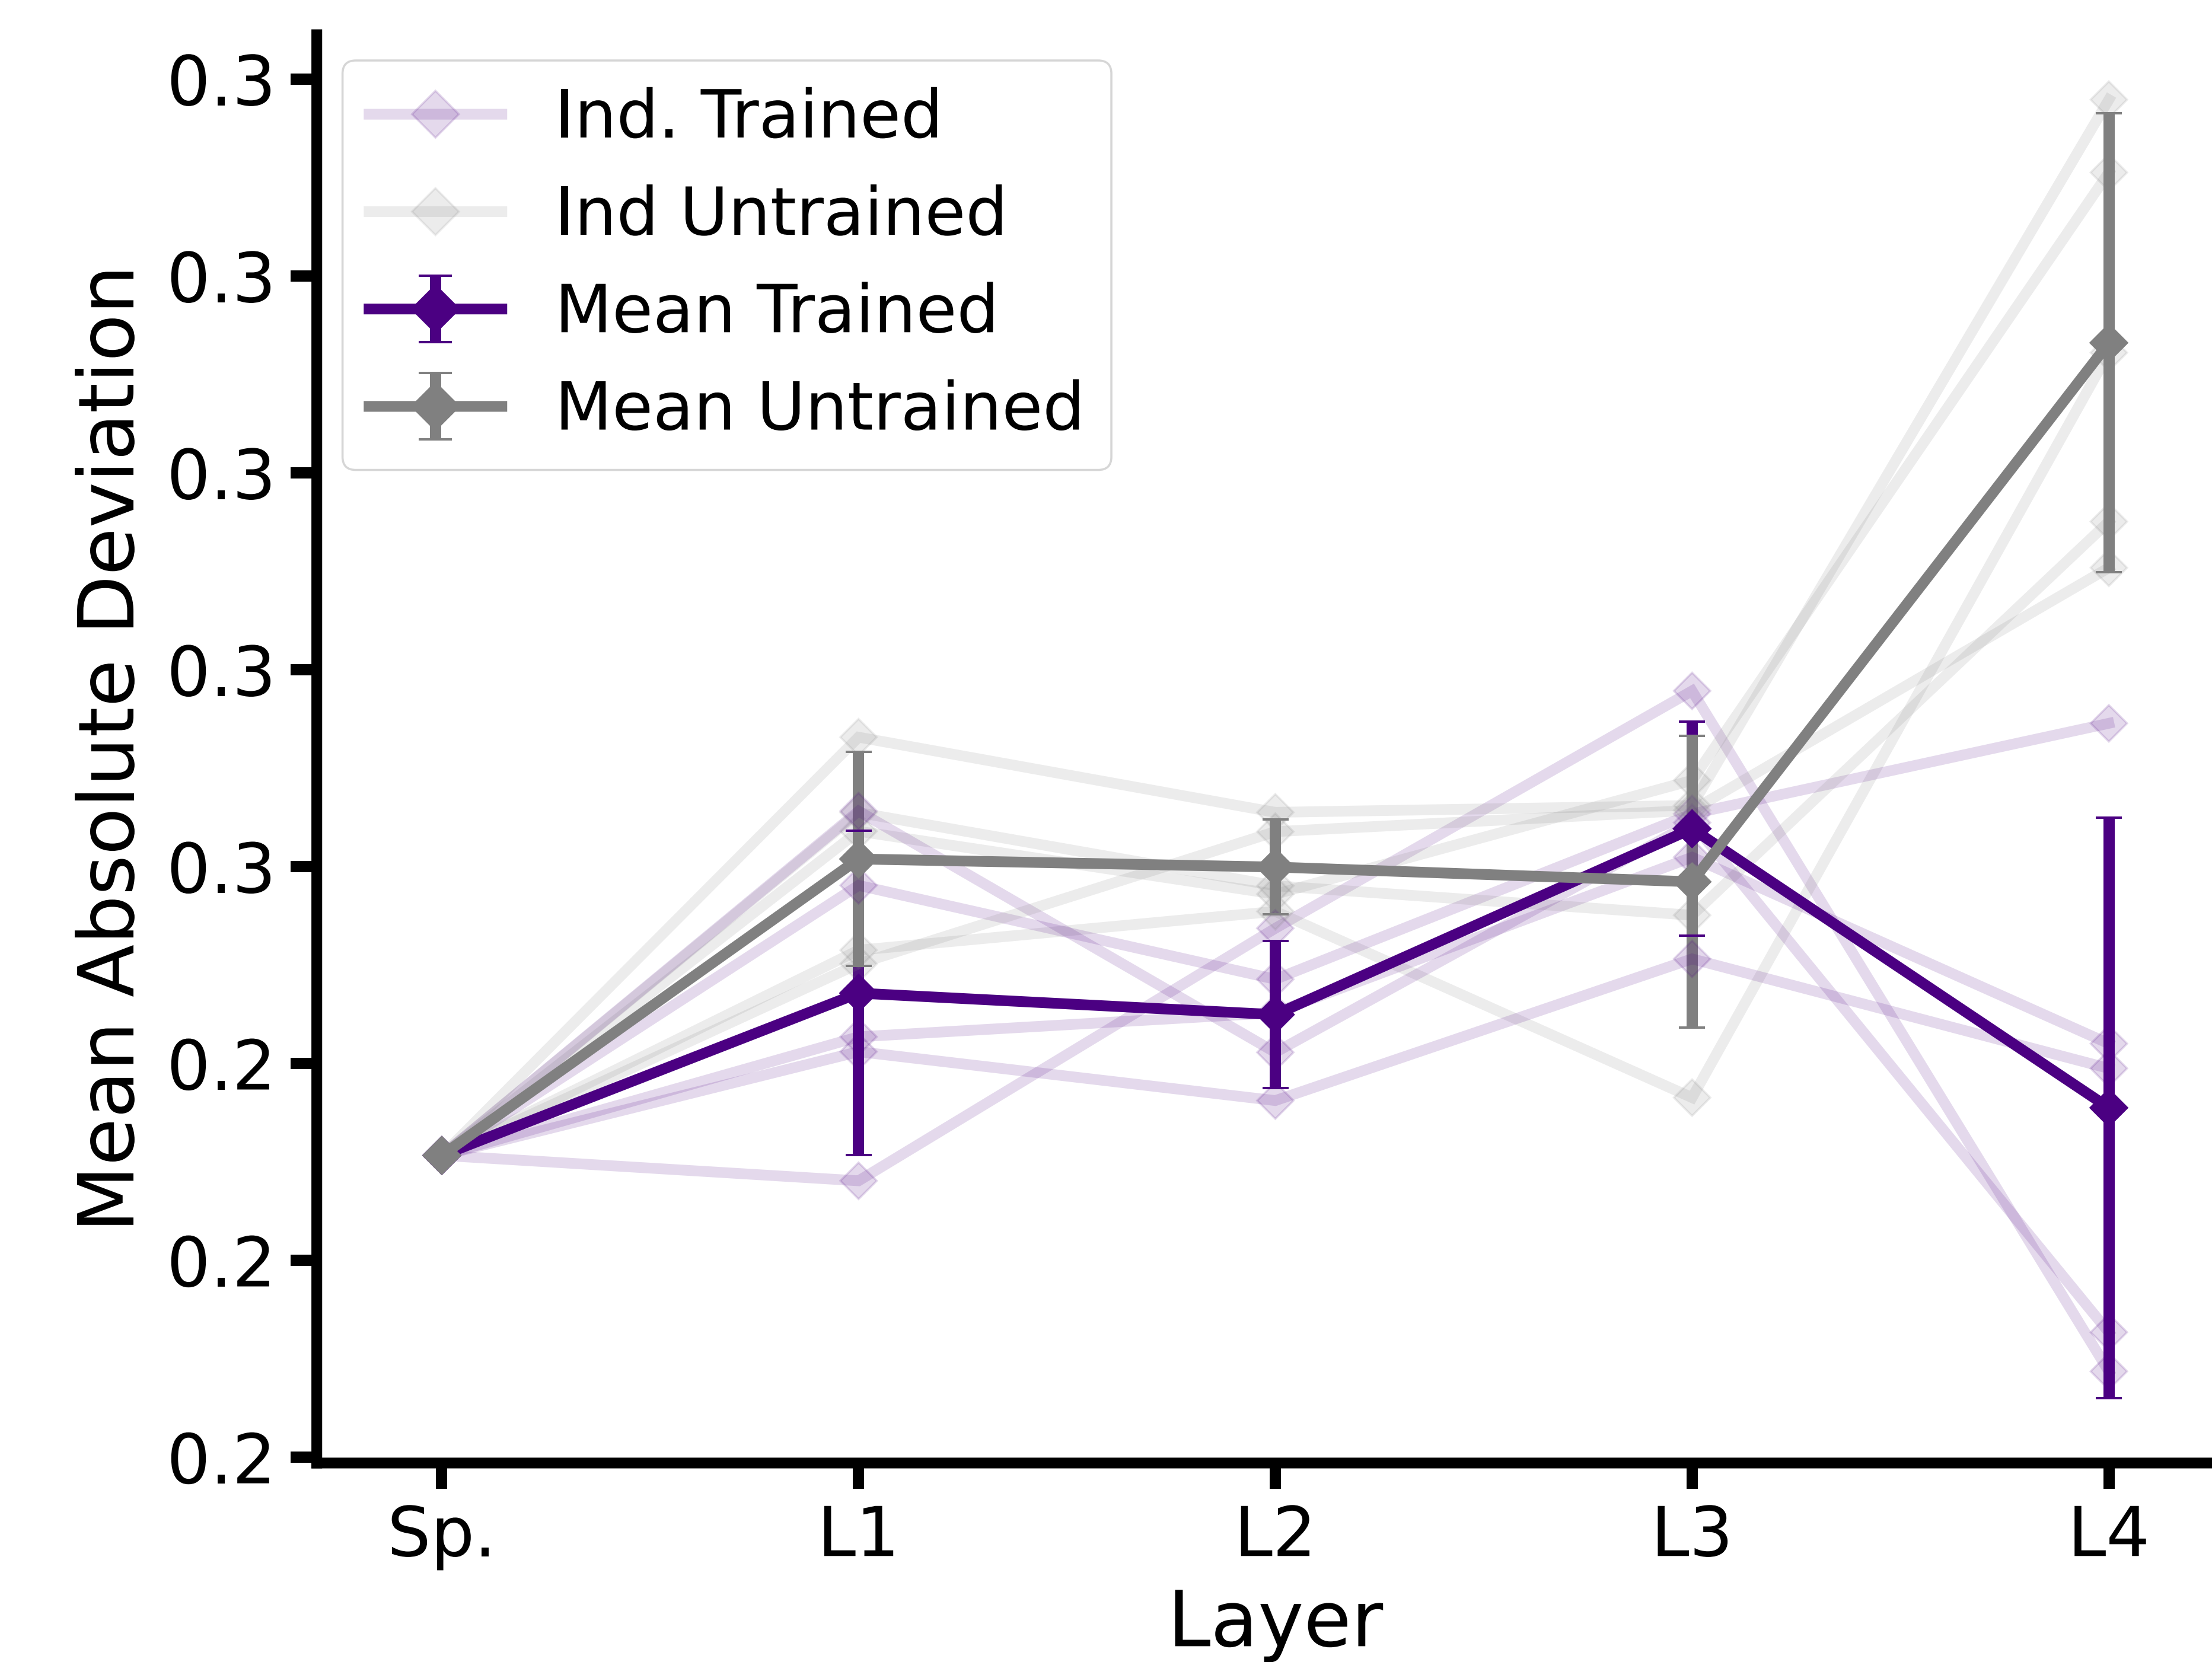**B**

Horizontal

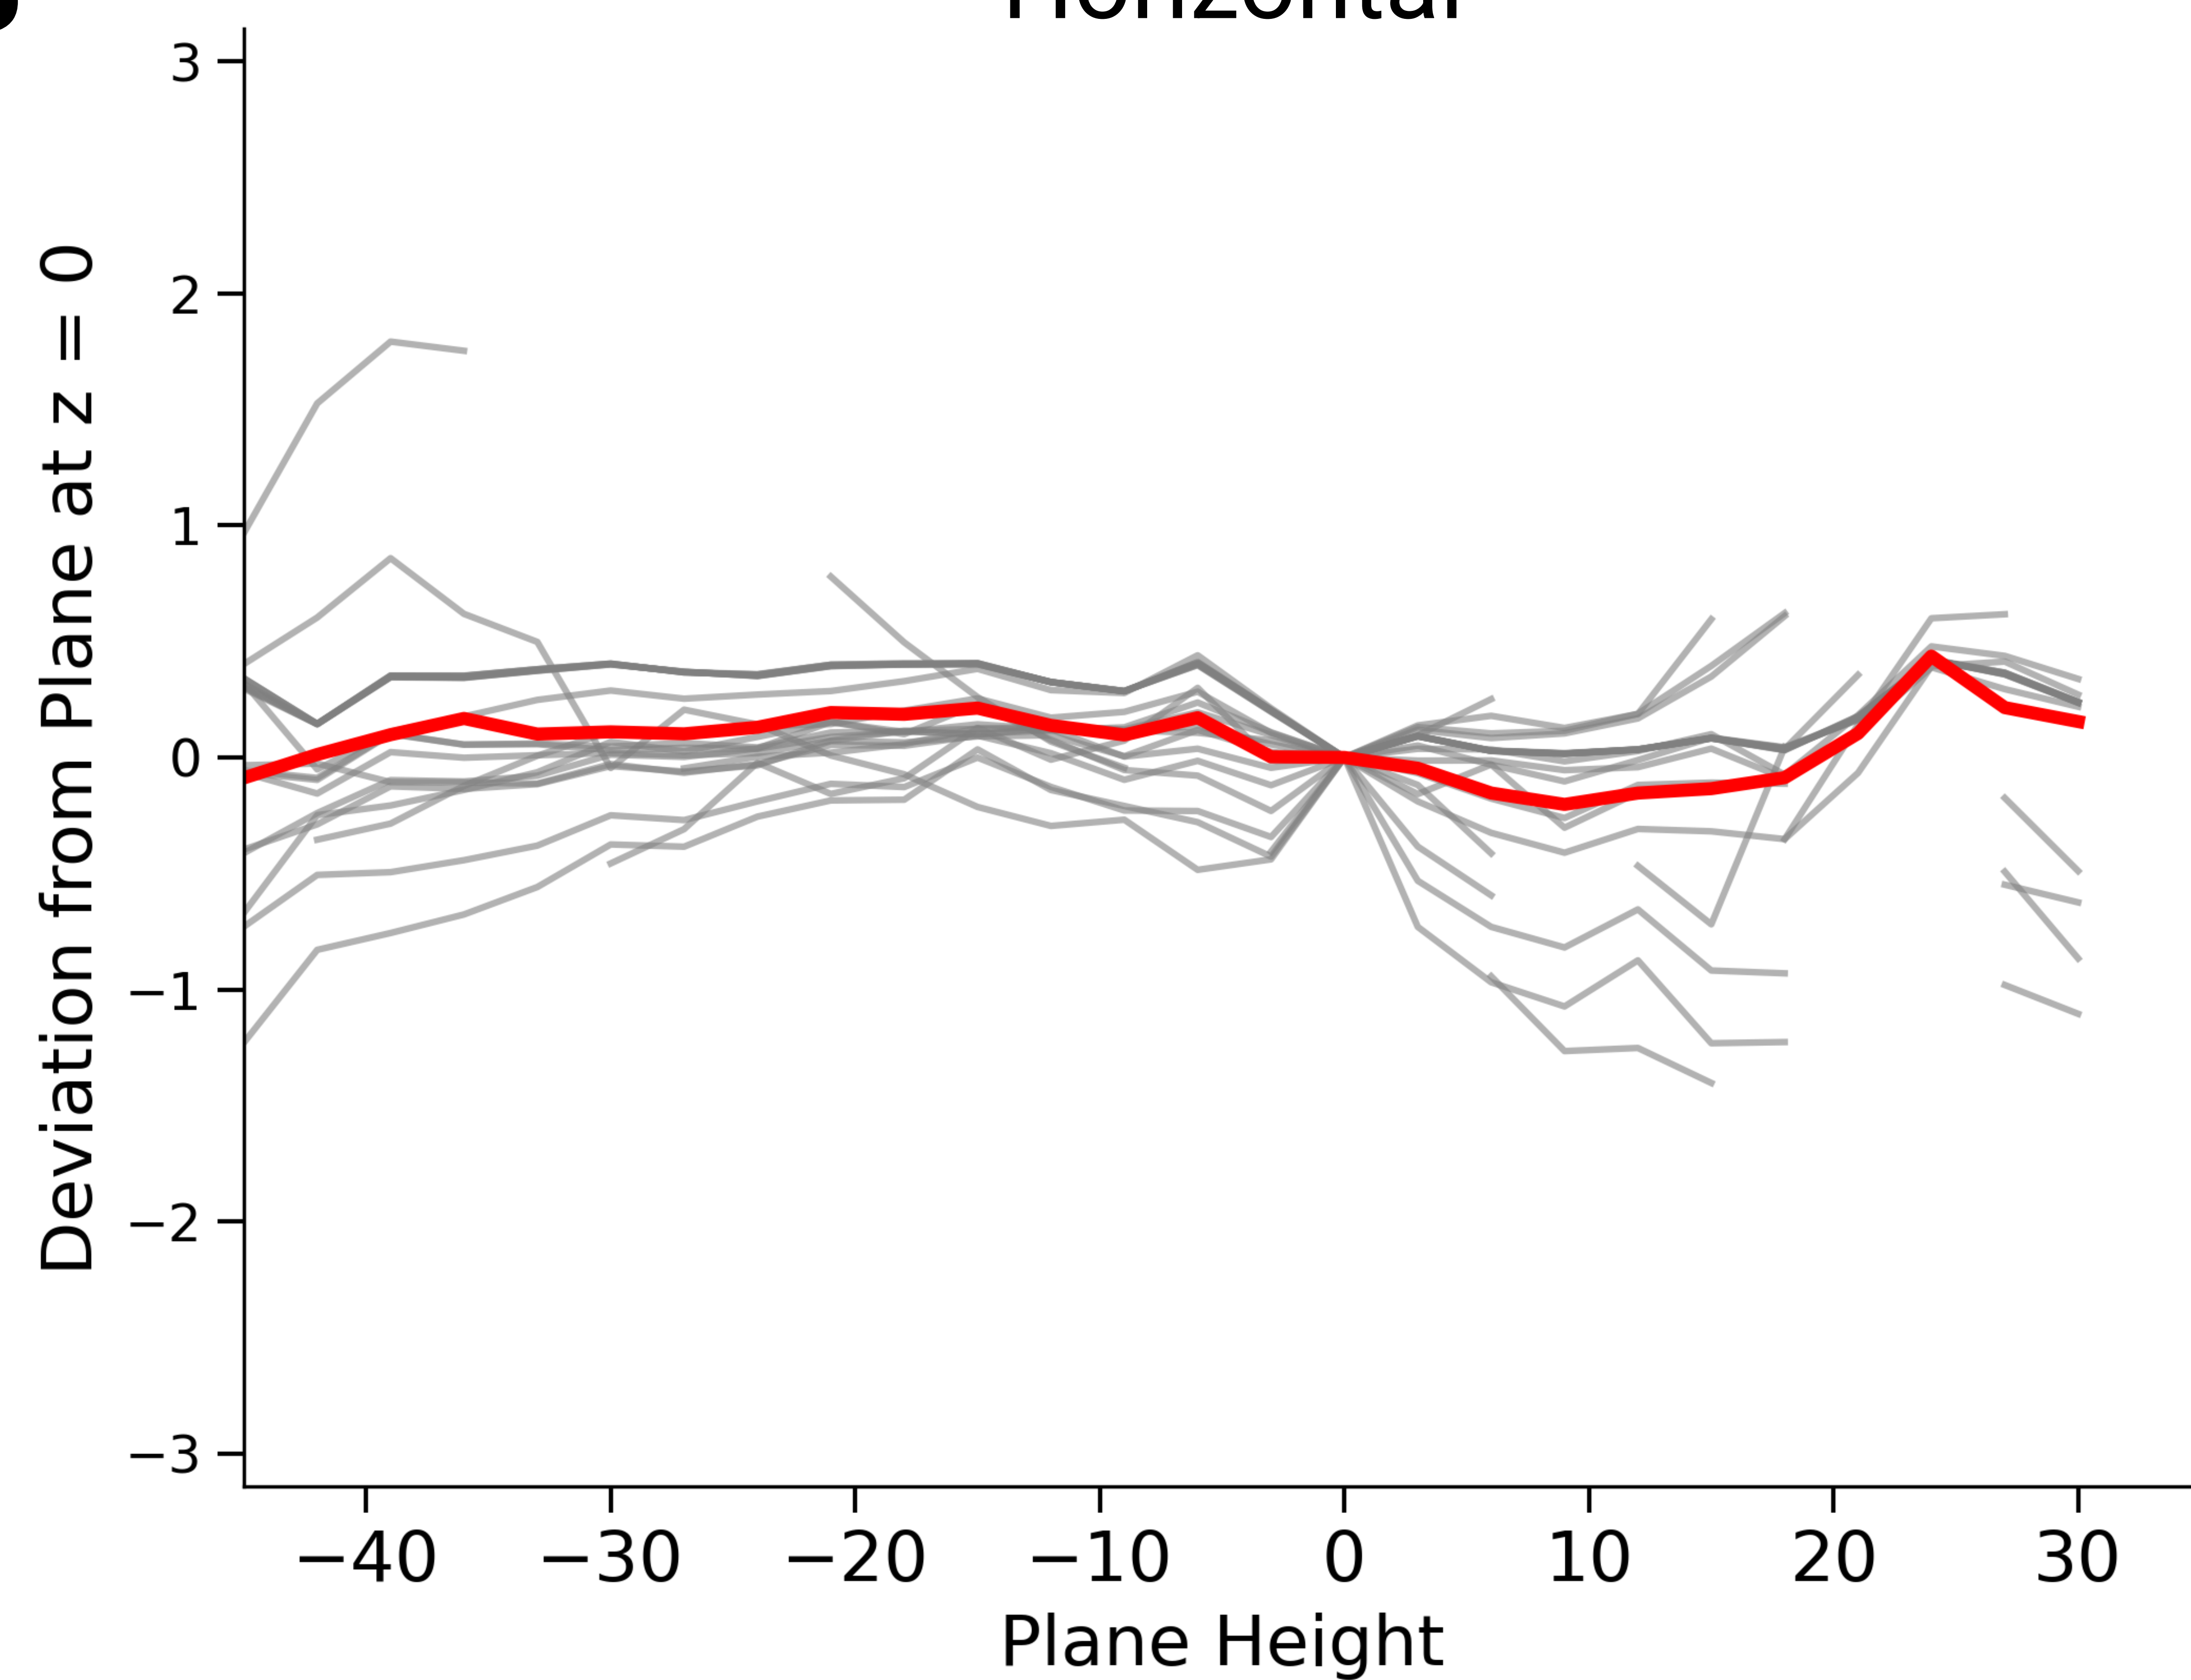**C**

Vertical

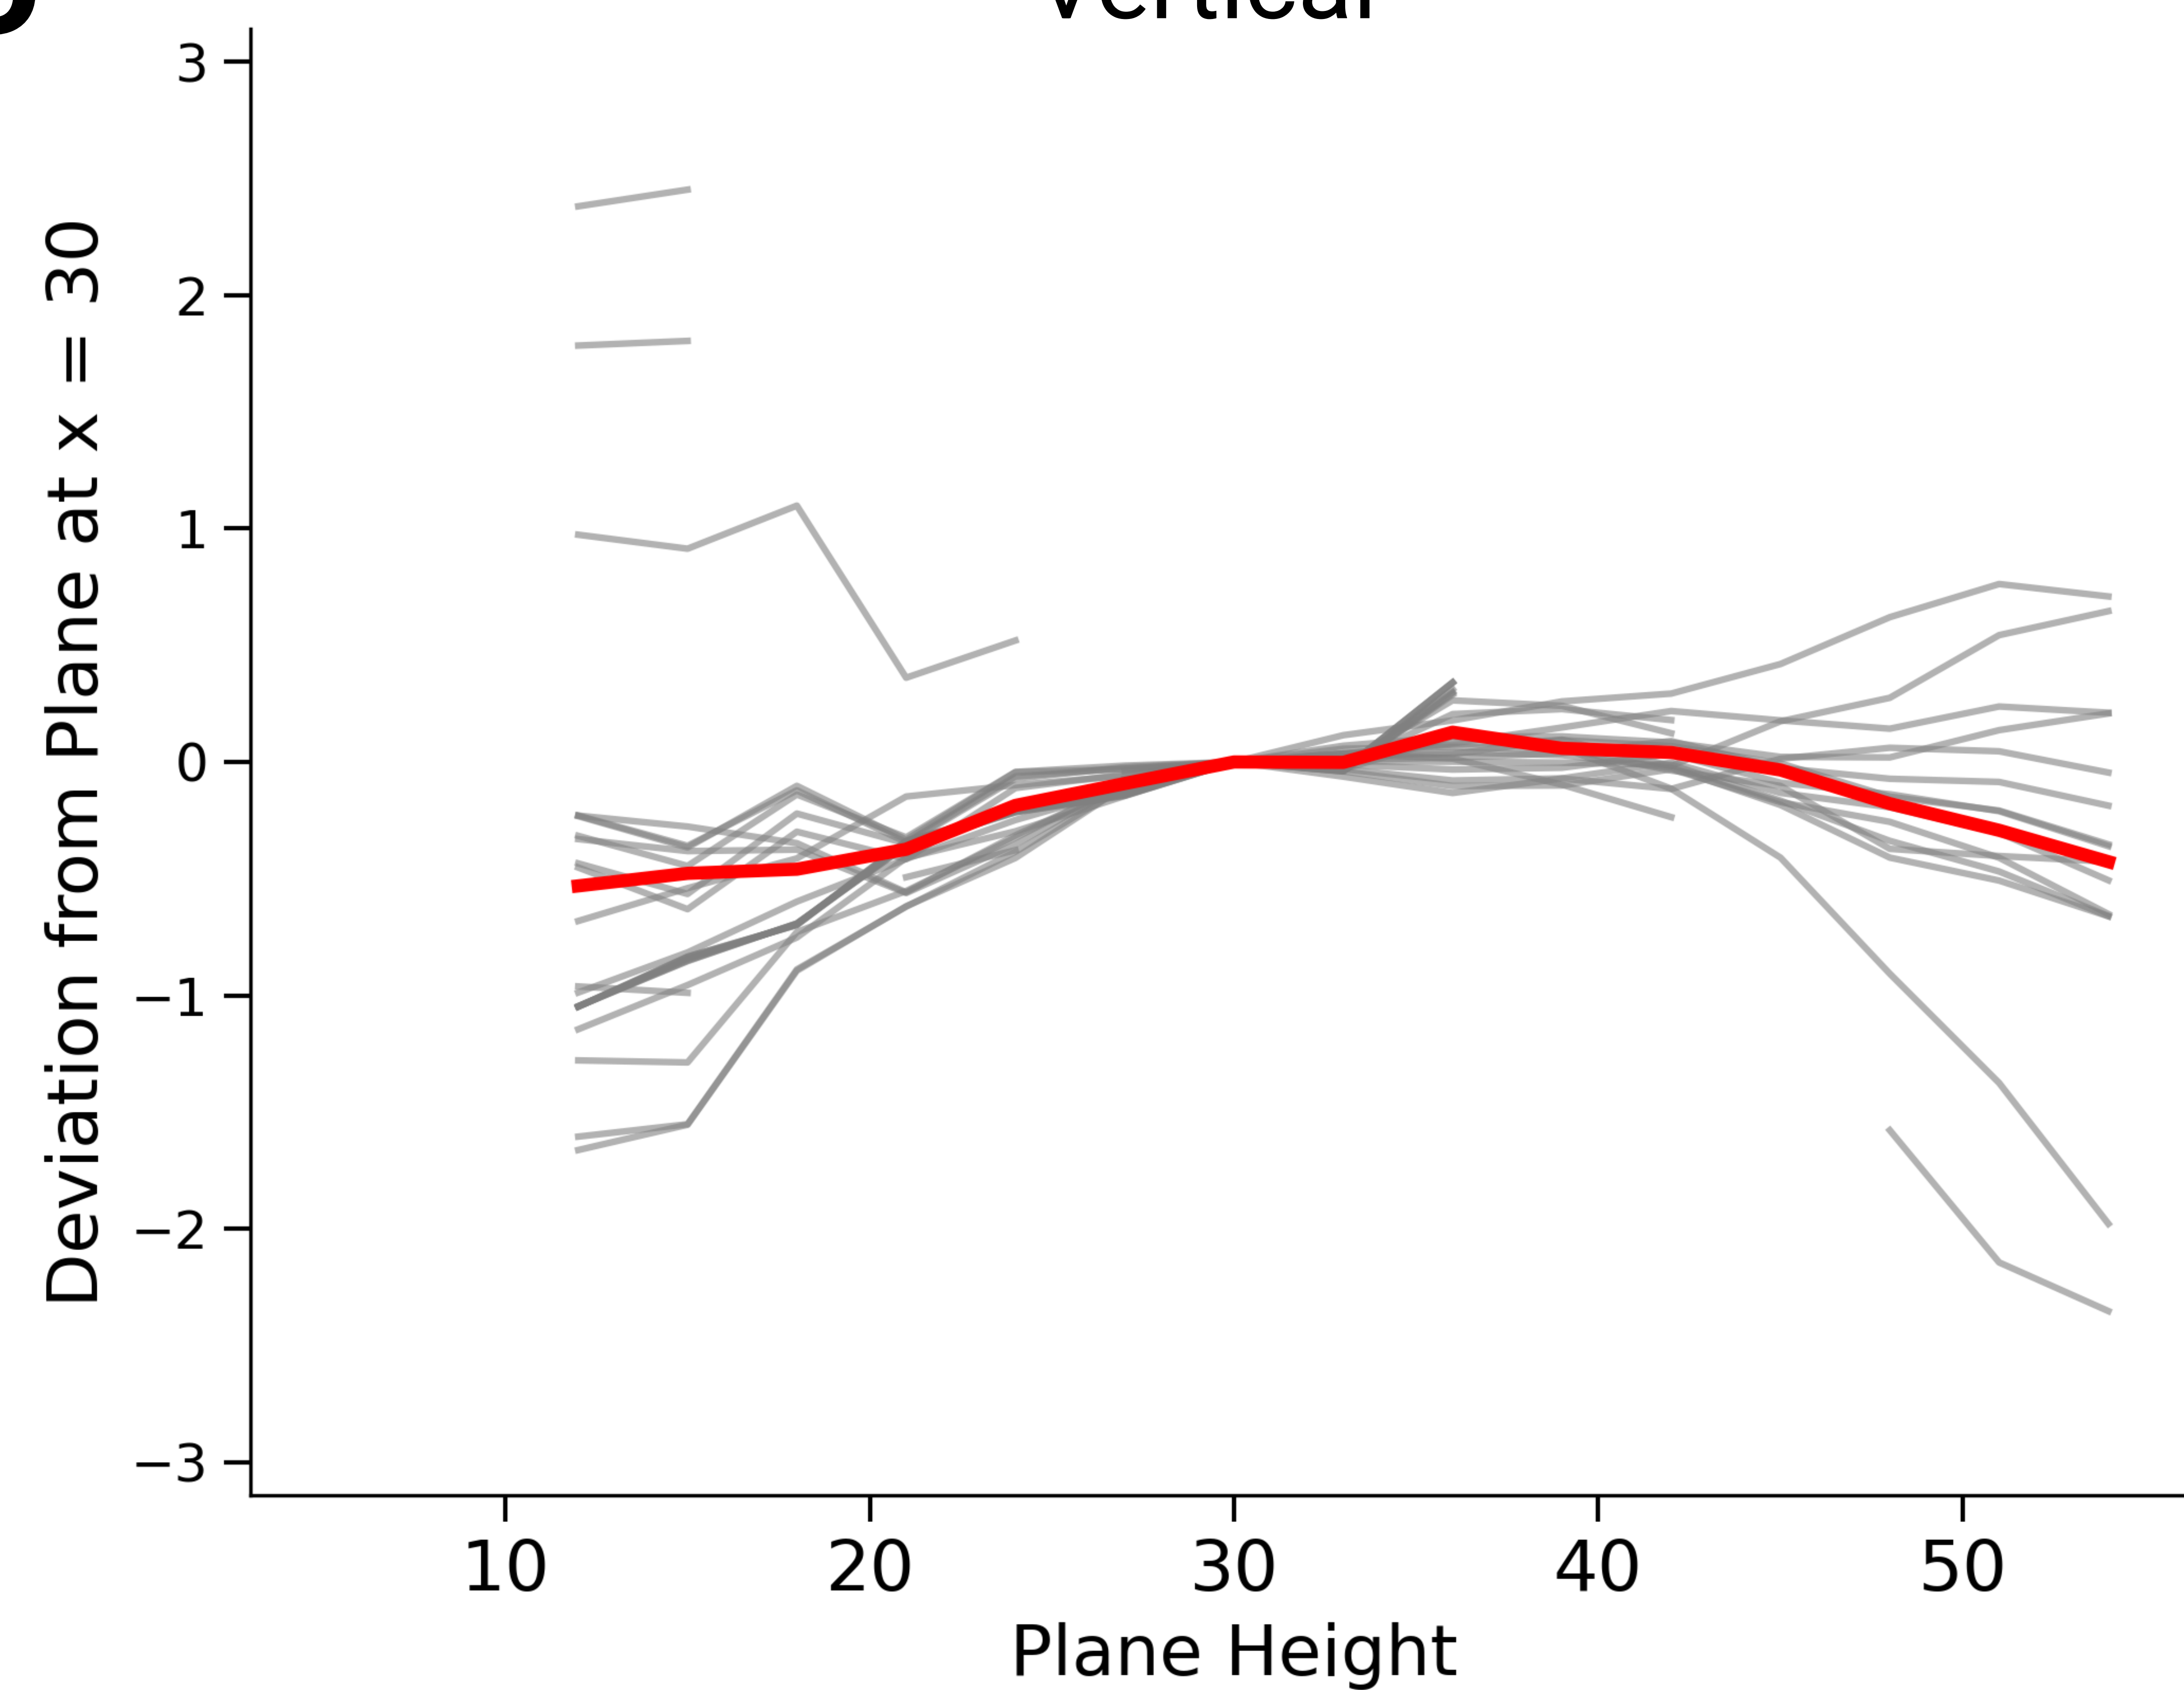**D**

Task-Trained

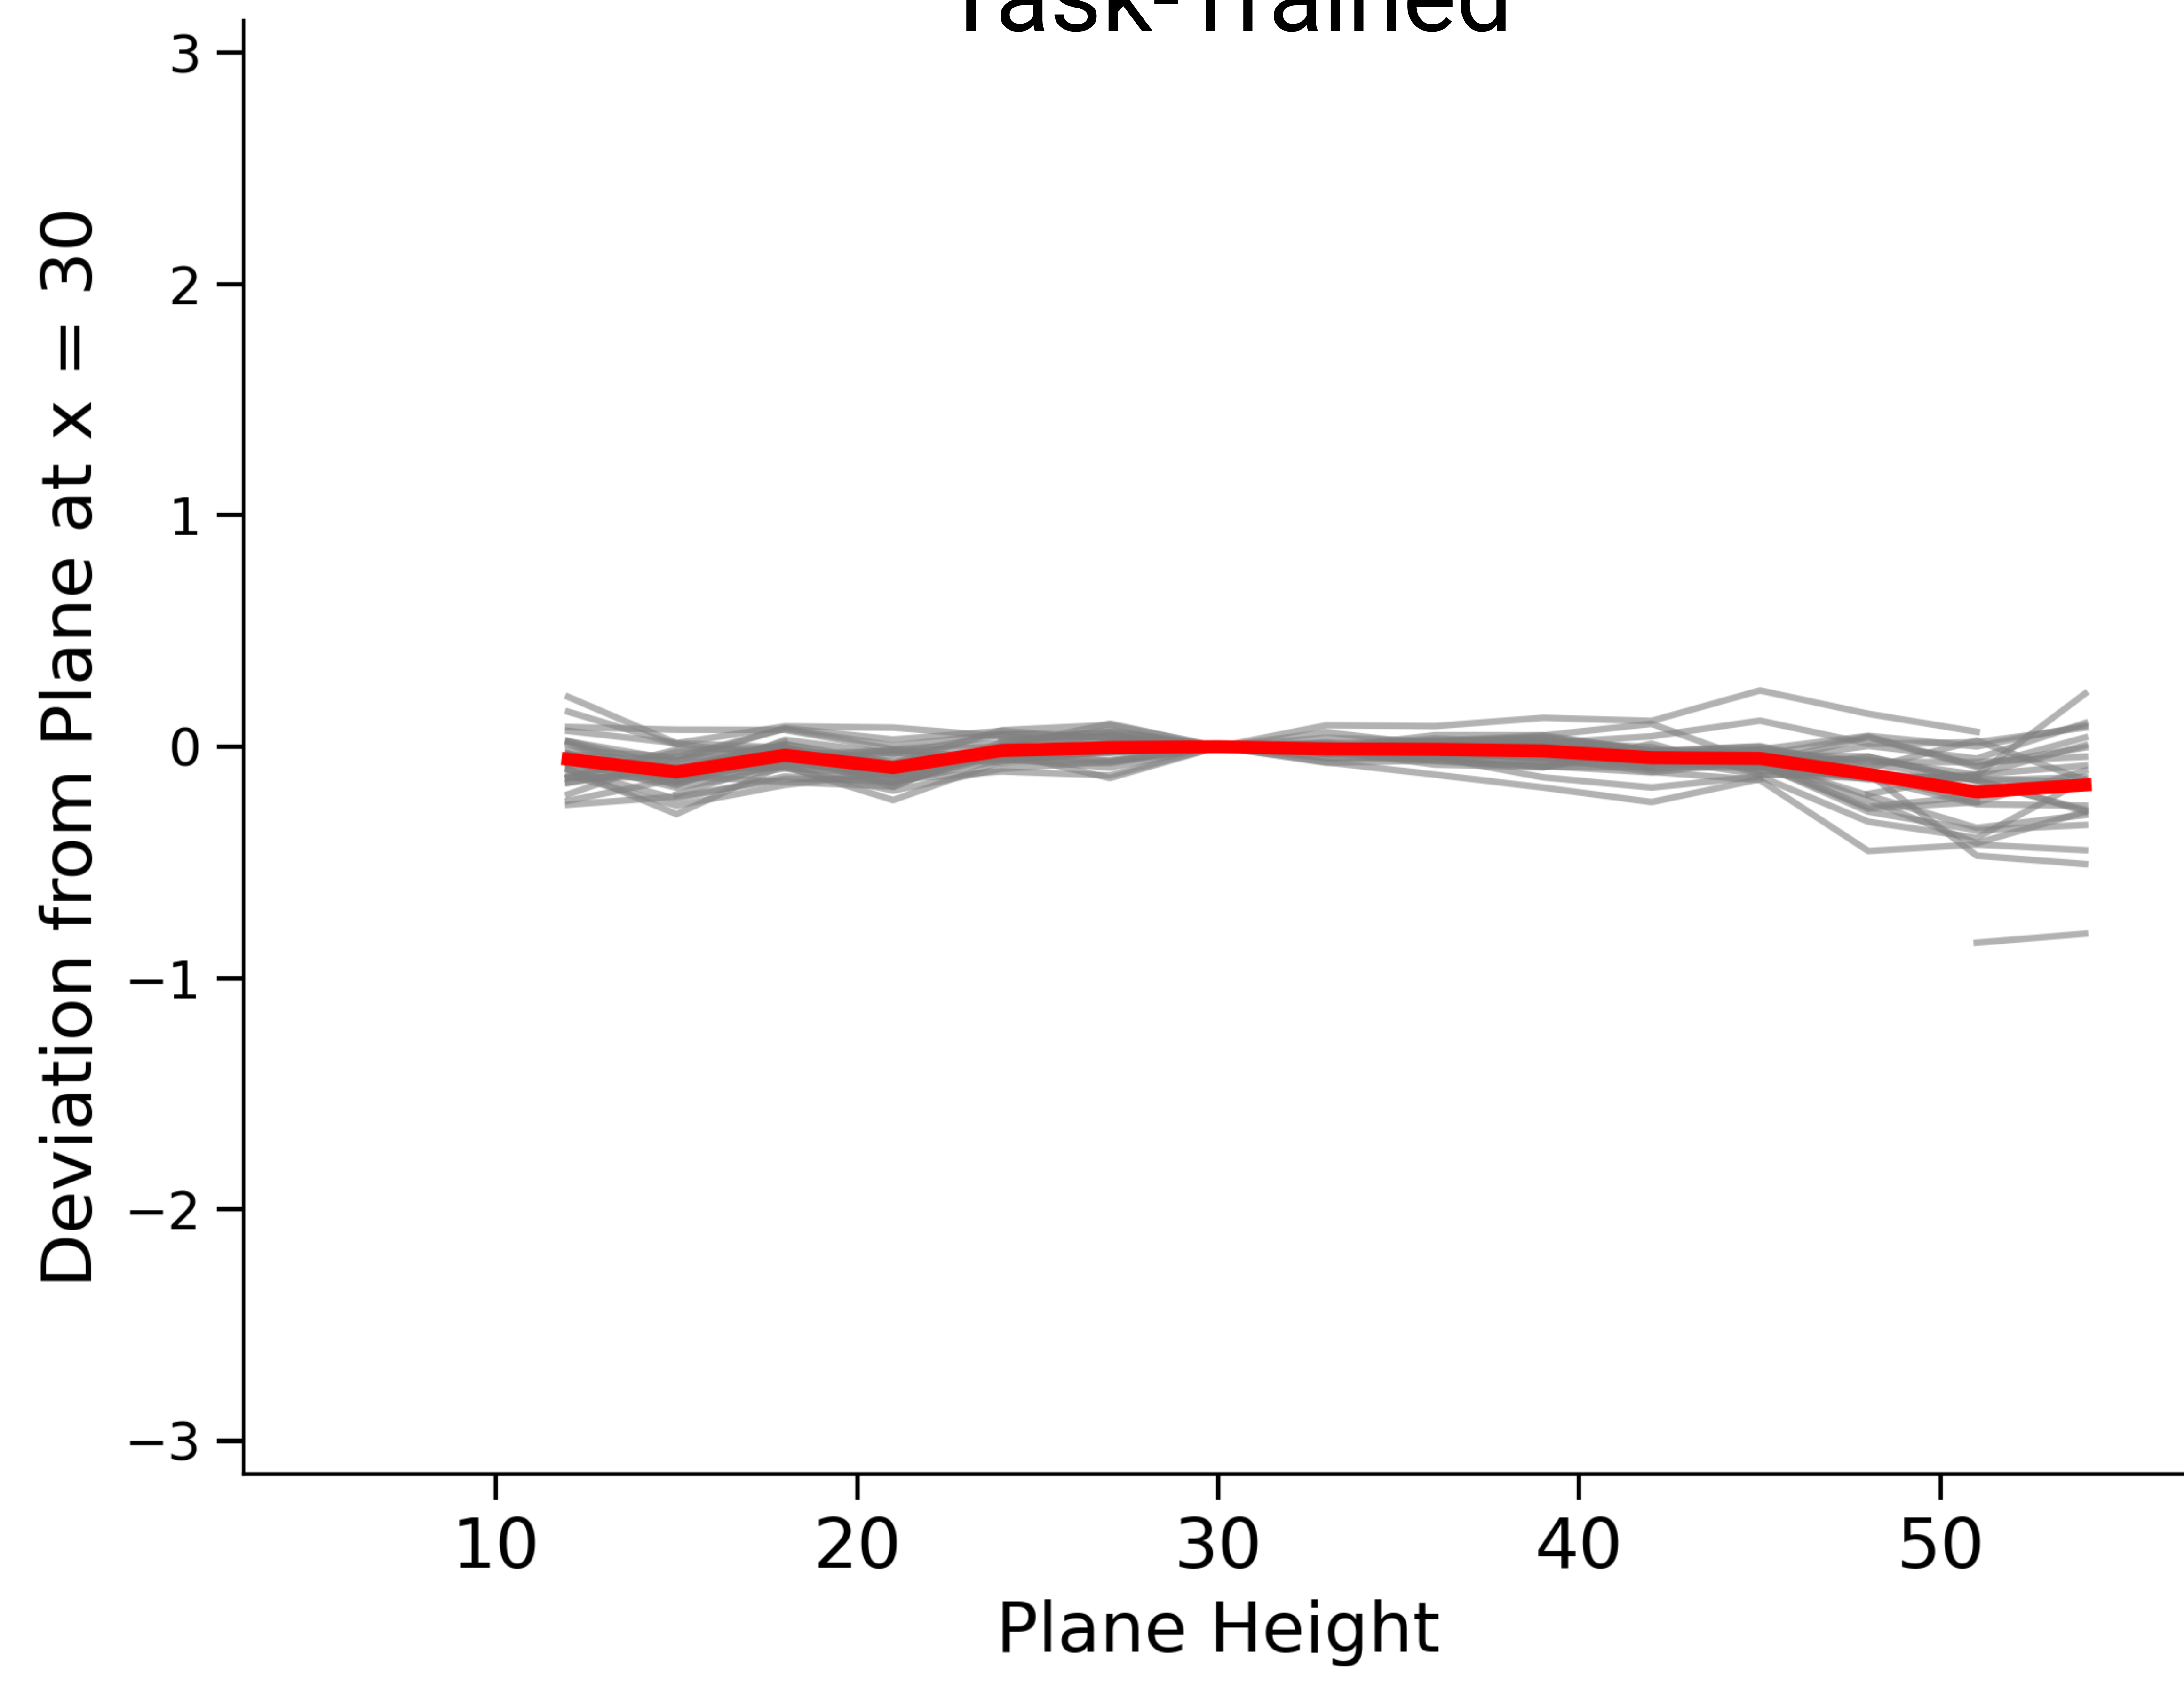**E**

Control

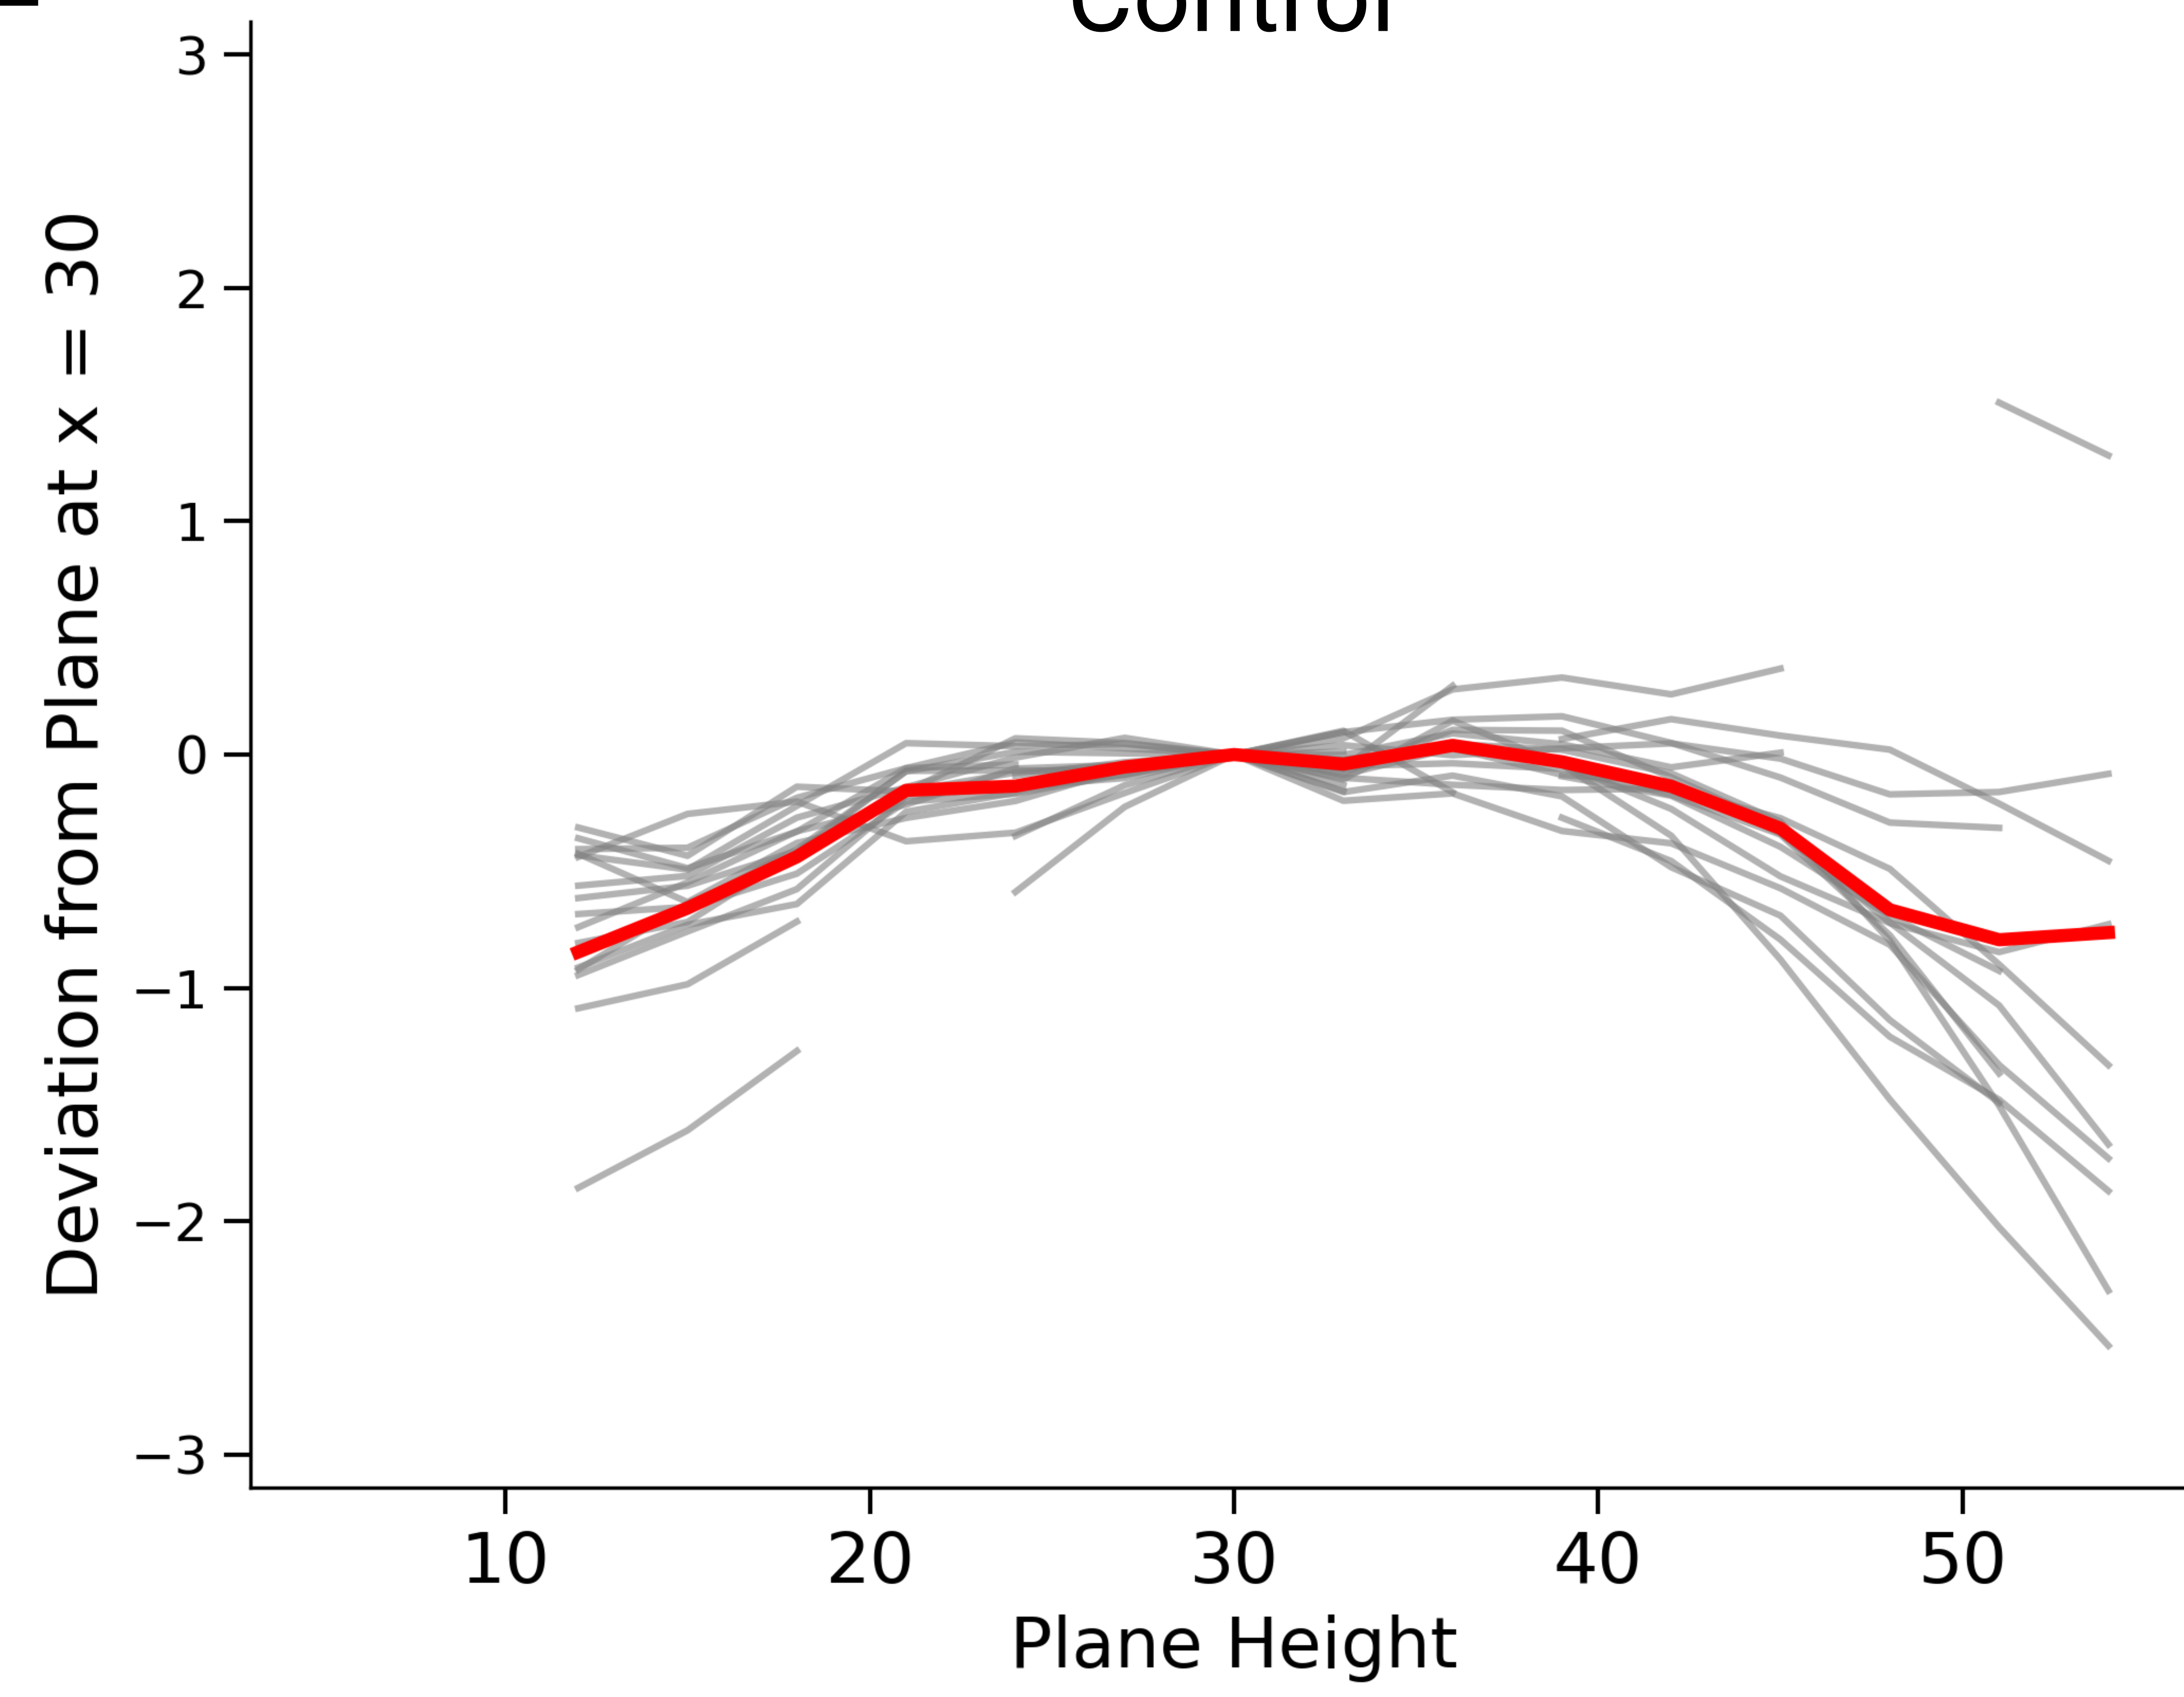

Supplement: supp [file elife_poa_e81499_Figure_7_figure_supplement_1.pdf › elife_poa_e81499_Figure_7_figure_supplement_1.pdf]
