# Supplementary figures and images for: Contrasting action and posture coding with hierarchical deep neural network models of proprioception
Source: eLife journal article supplement (doi:10.7554/elife.81499), 2023-05-31

**A**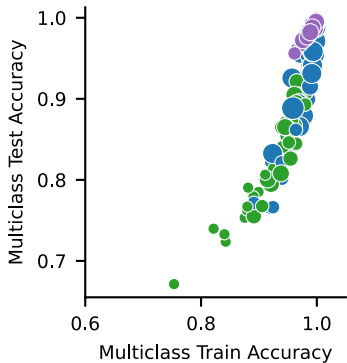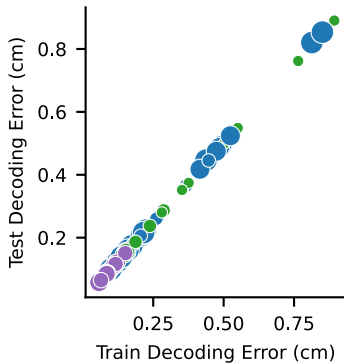

● Spatial-Temporal ● Spatiotemporal ● LSTM

**B**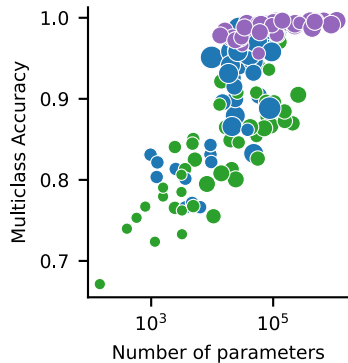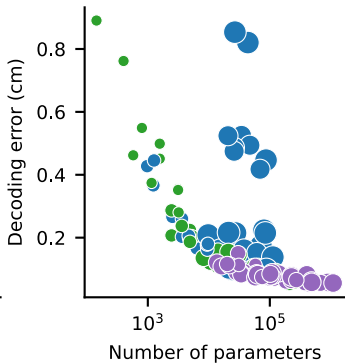

Number of Layers: 1 ● ● ● ● ● 8

Supplement: supp [file elife_poa_e81499_Figure_3_figure_supplement_1.pdf › elife_poa_e81499_Figure_3_figure_supplement_1.pdf]

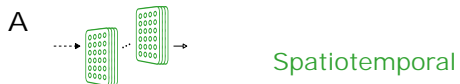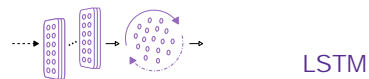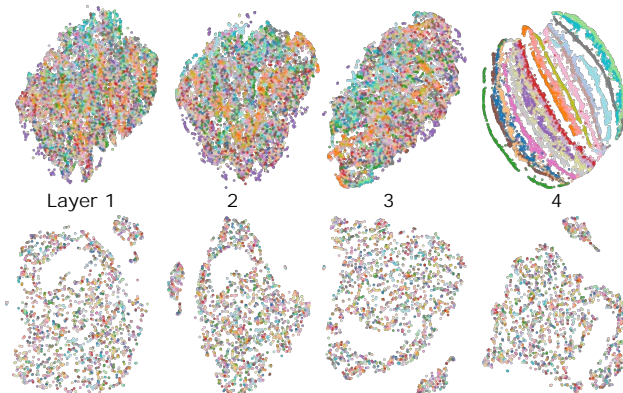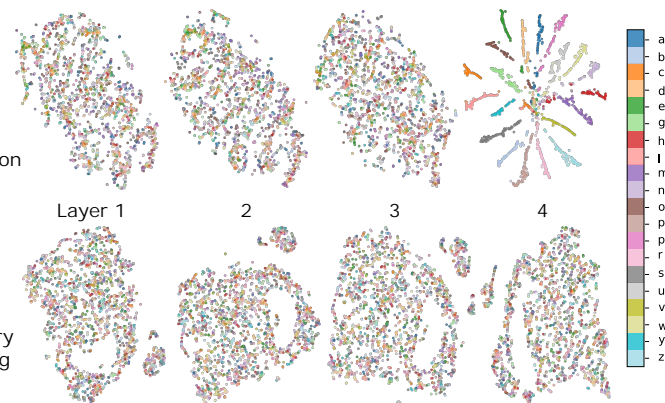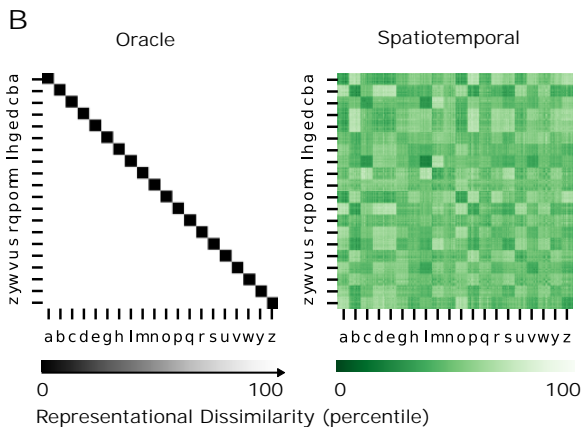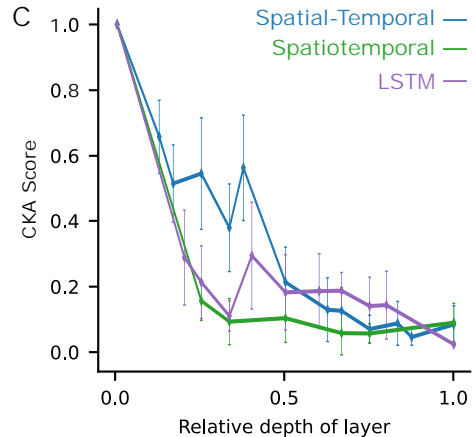

Supplement: supp [file elife_poa_e81499_Figure_4_figure_supplement_1.pdf › elife_poa_e81499_Figure_4_figure_supplement_1.pdf]

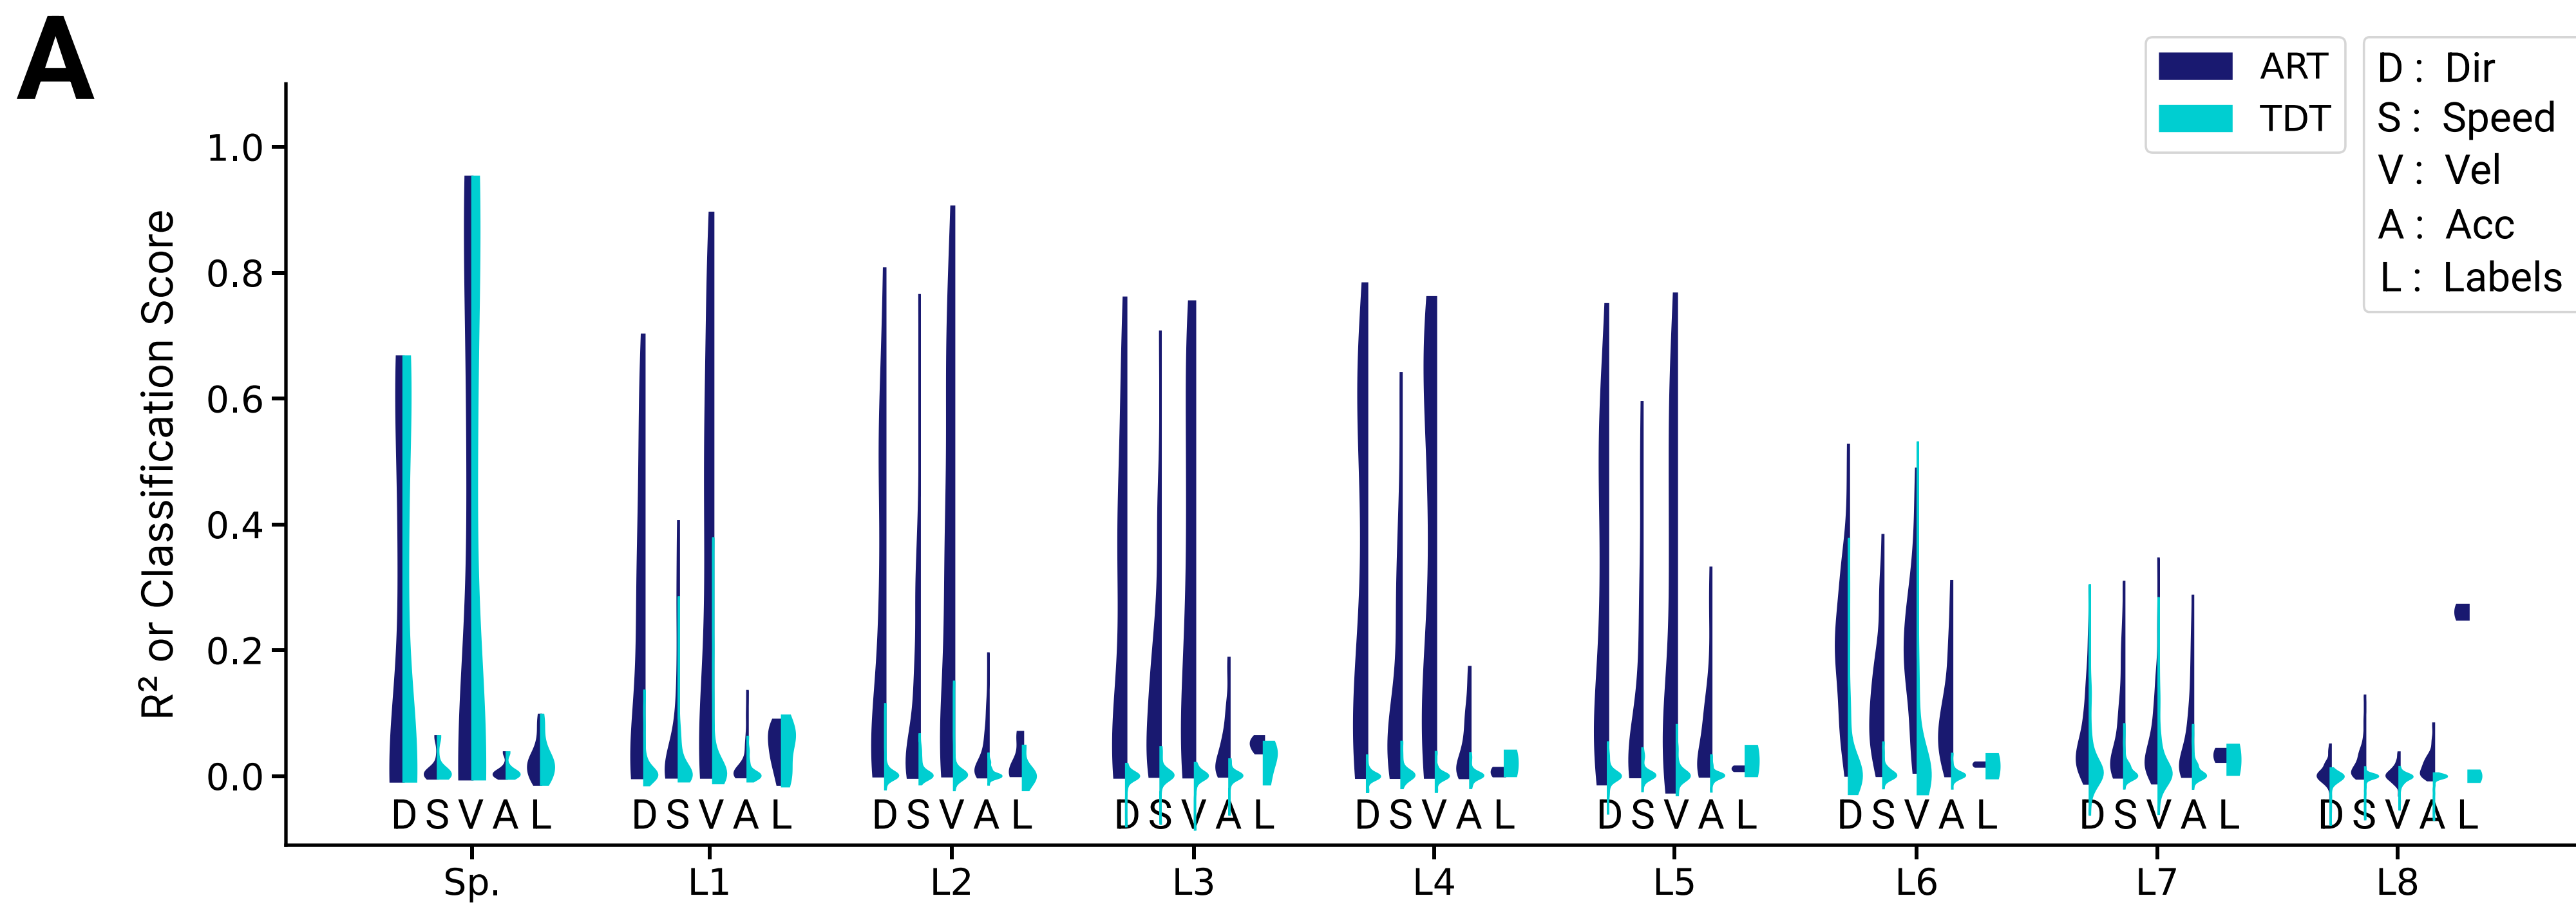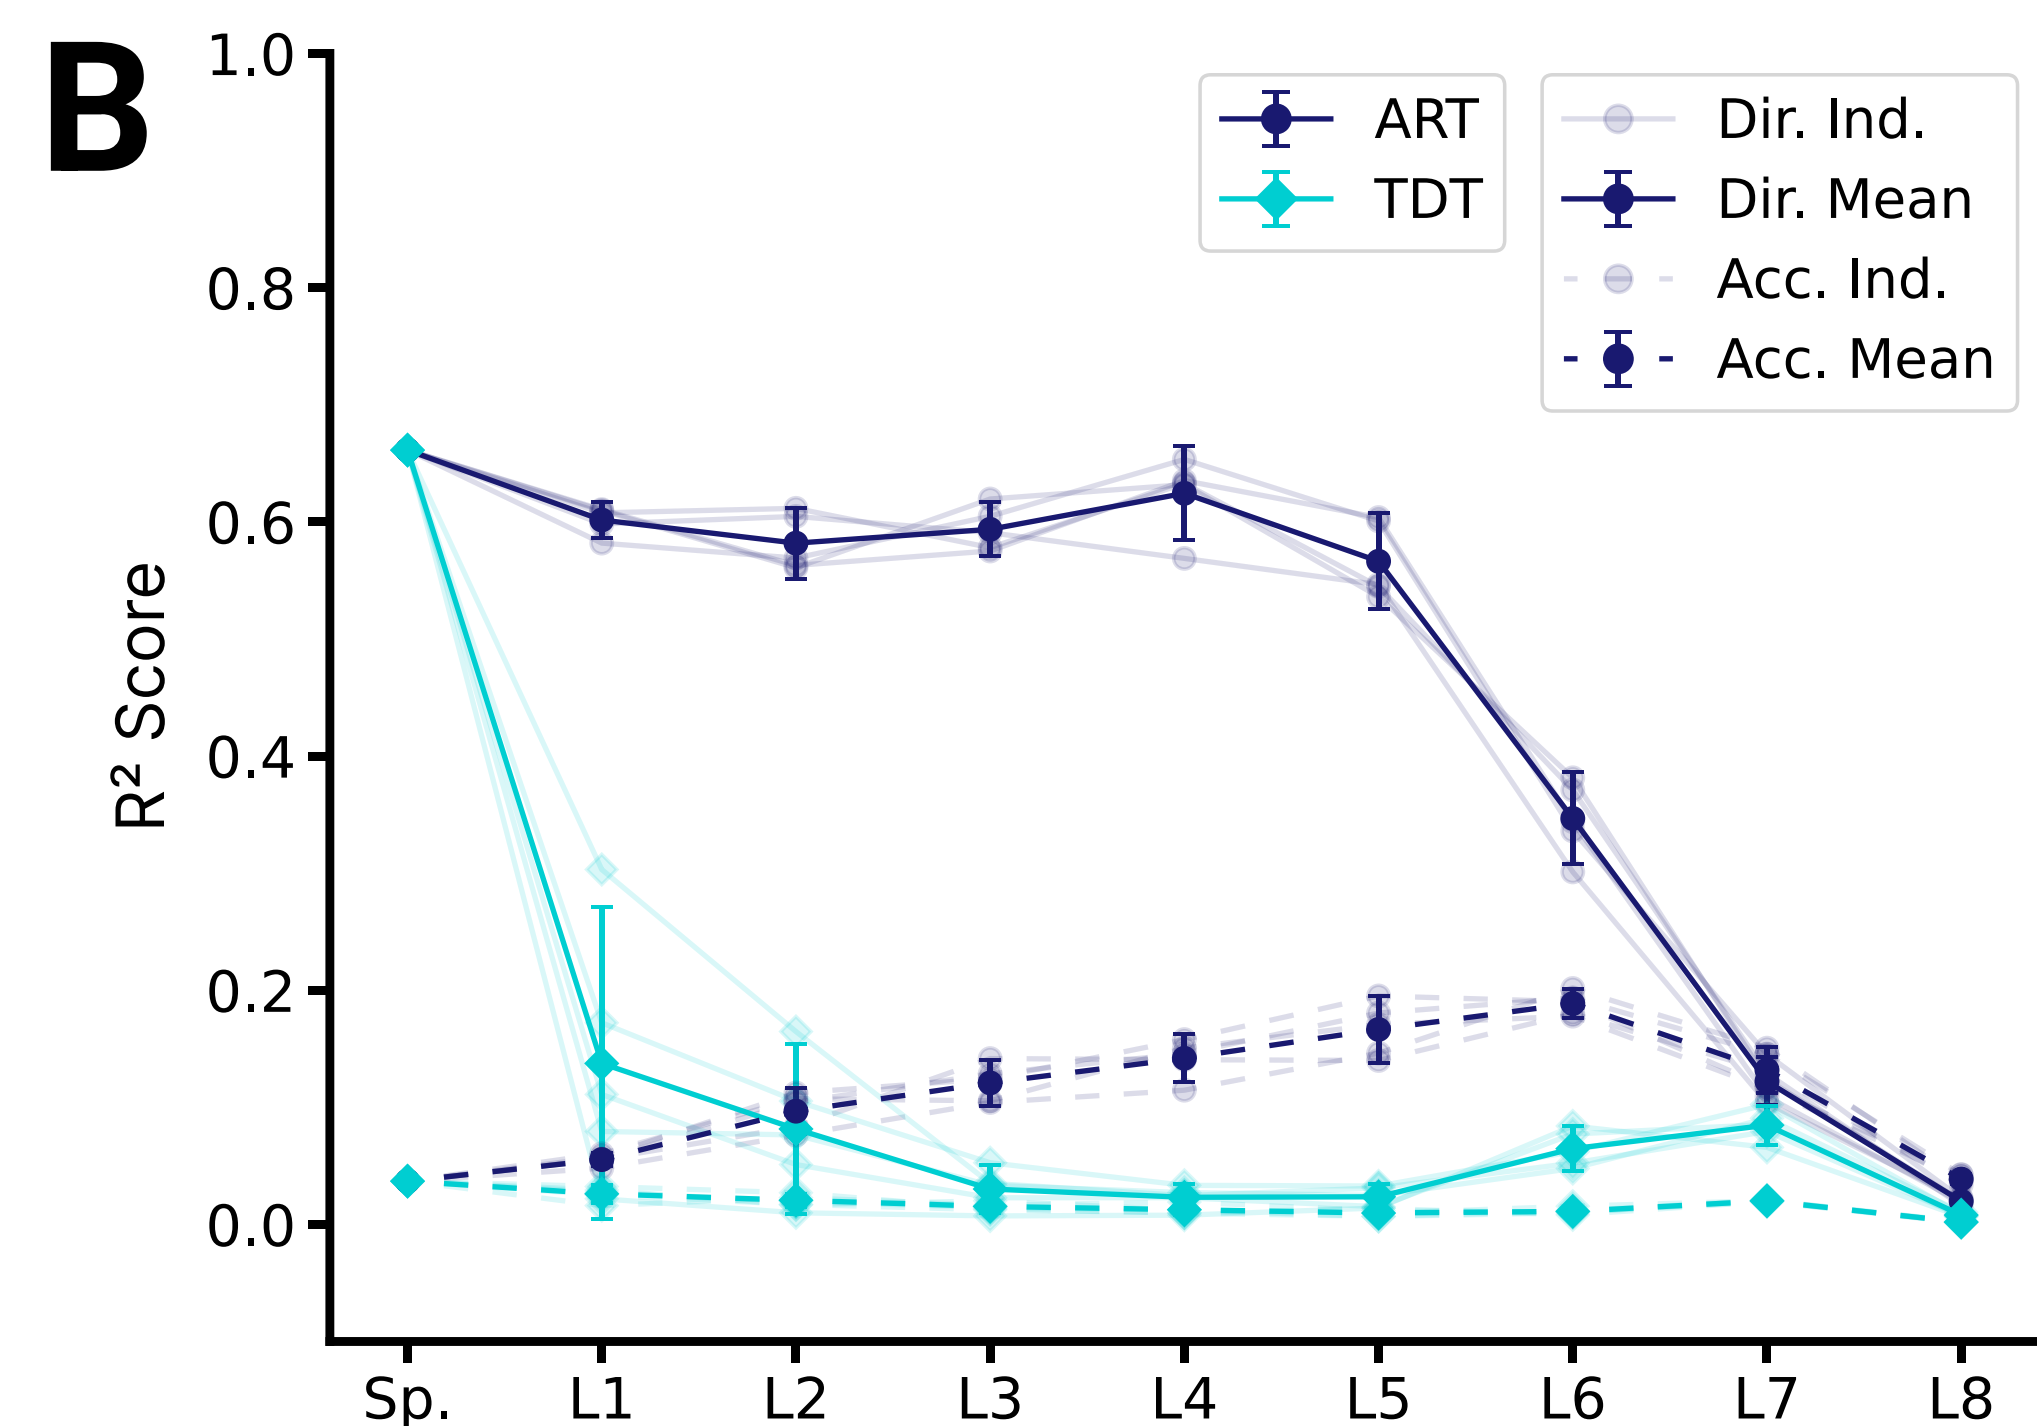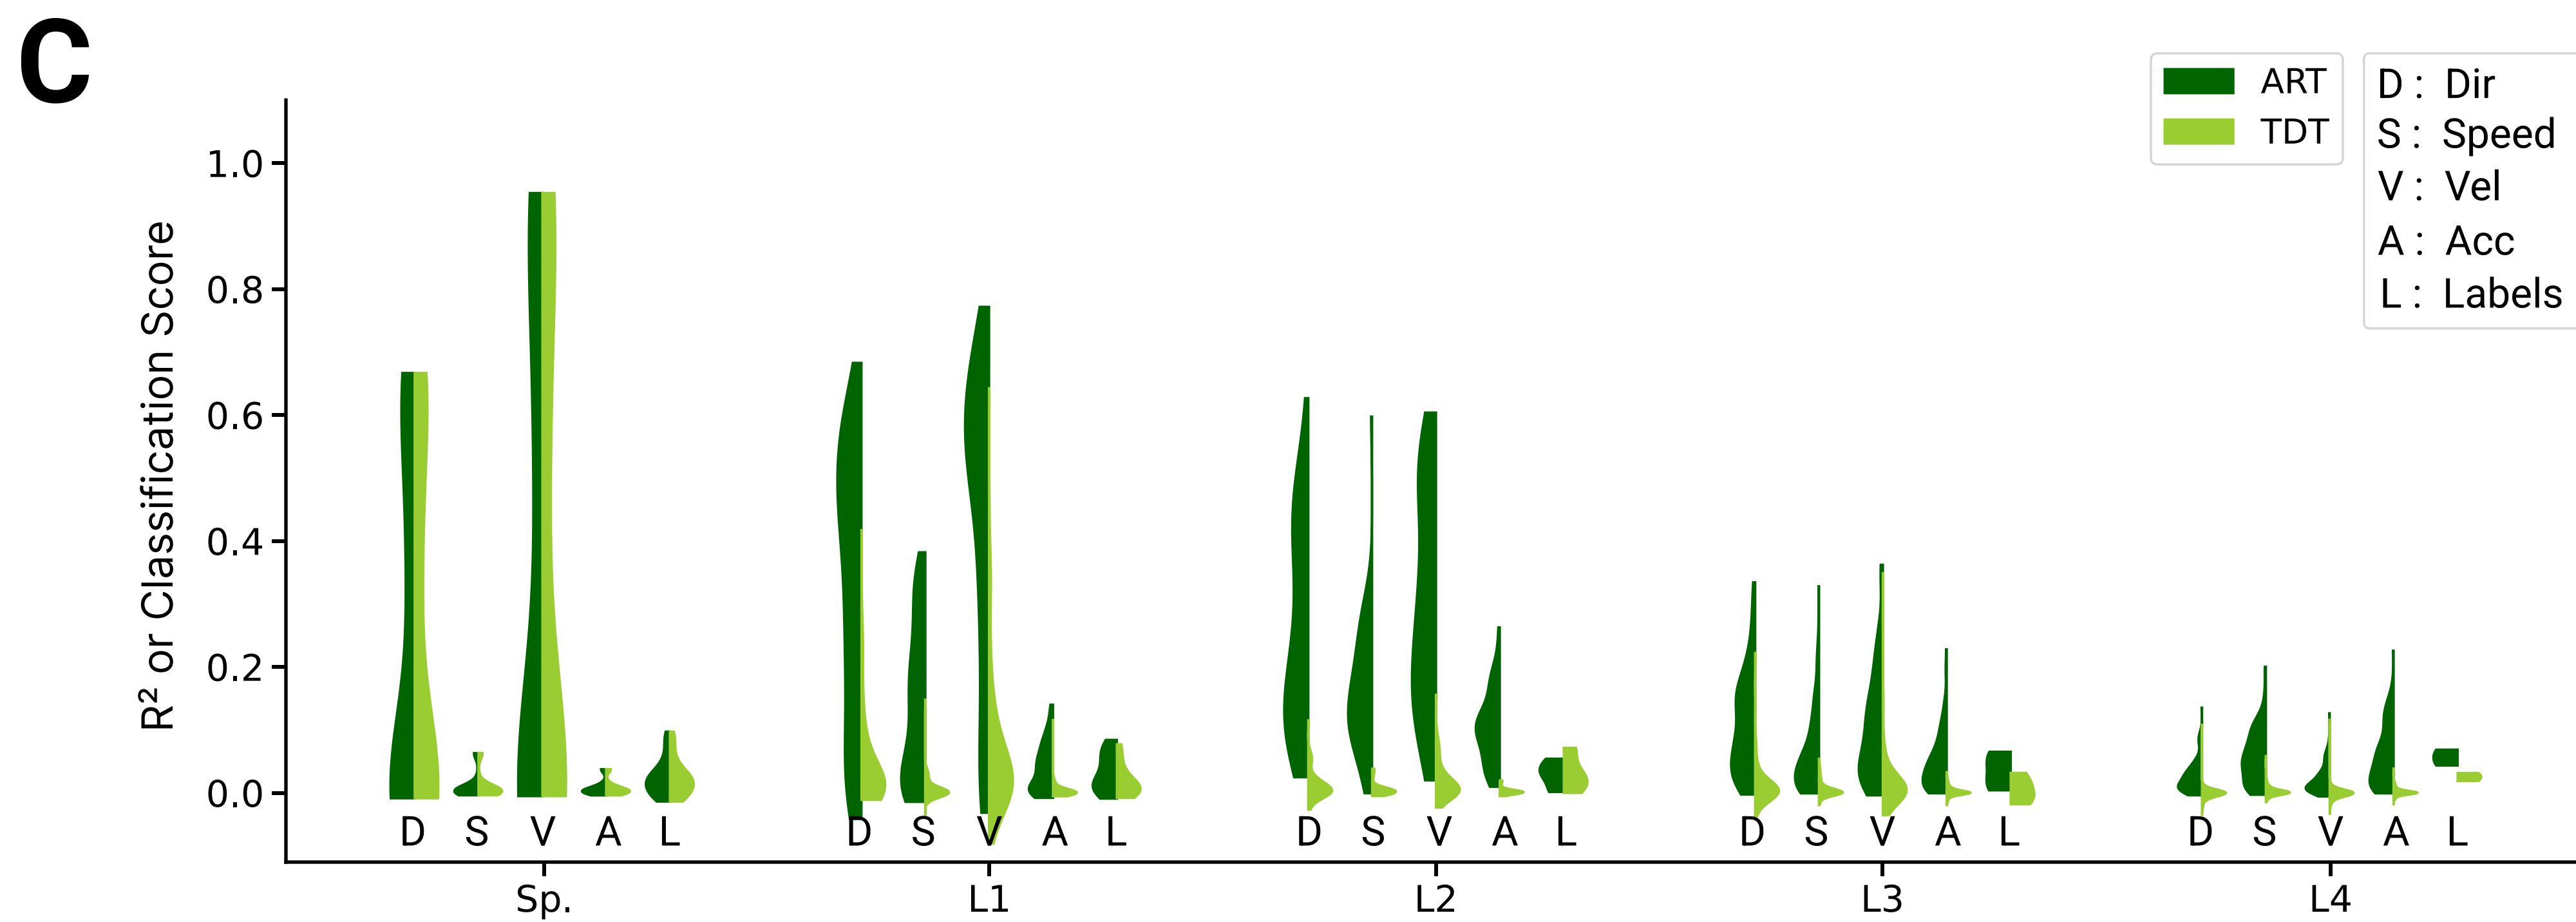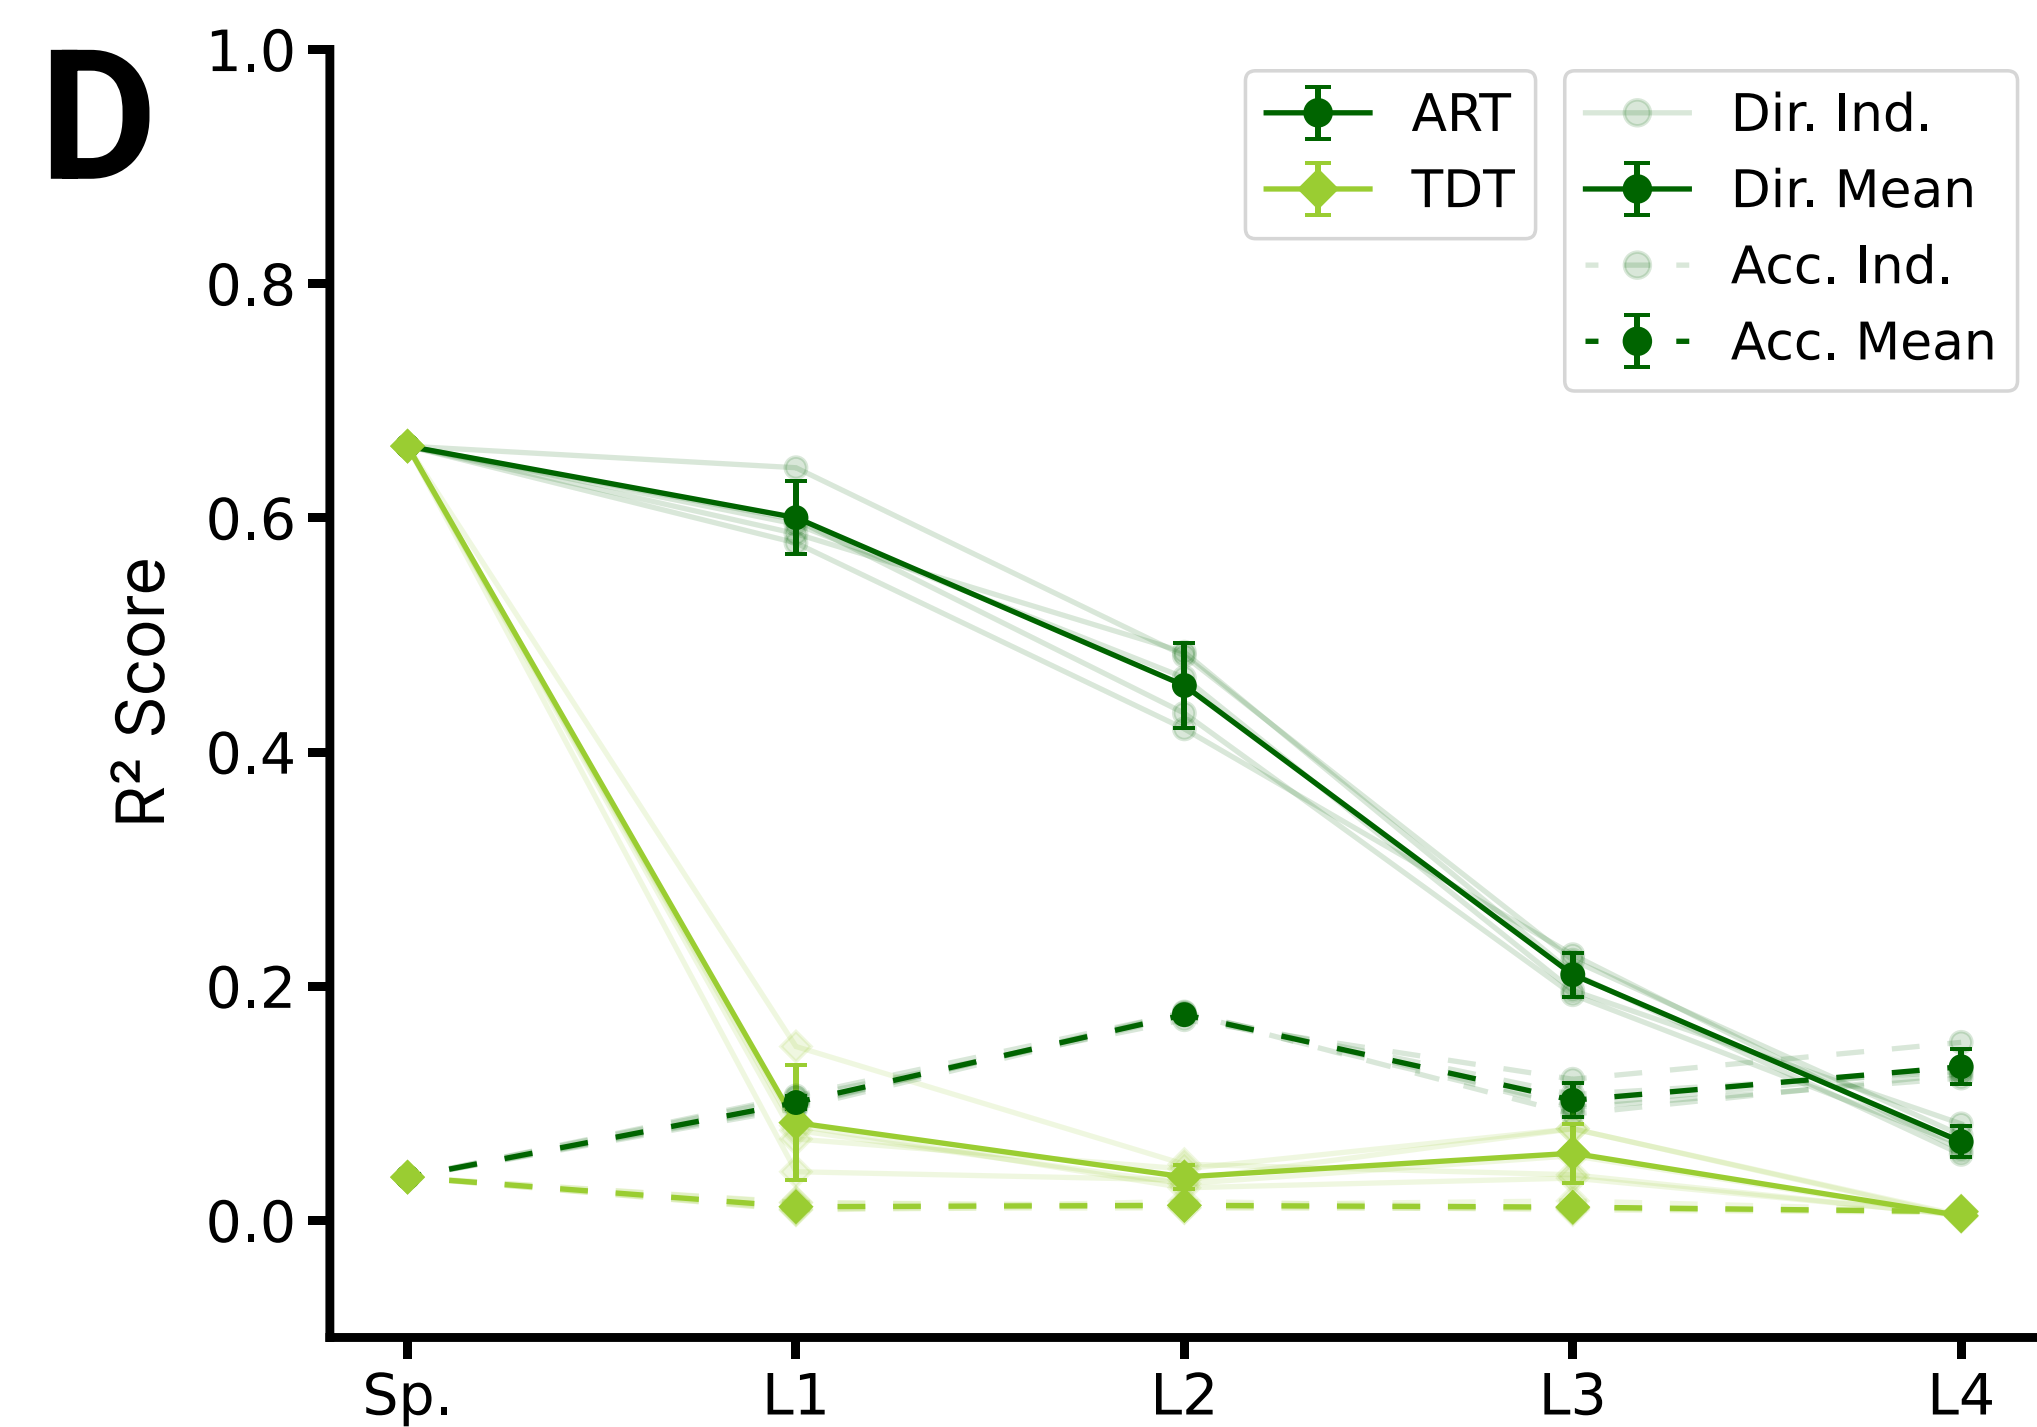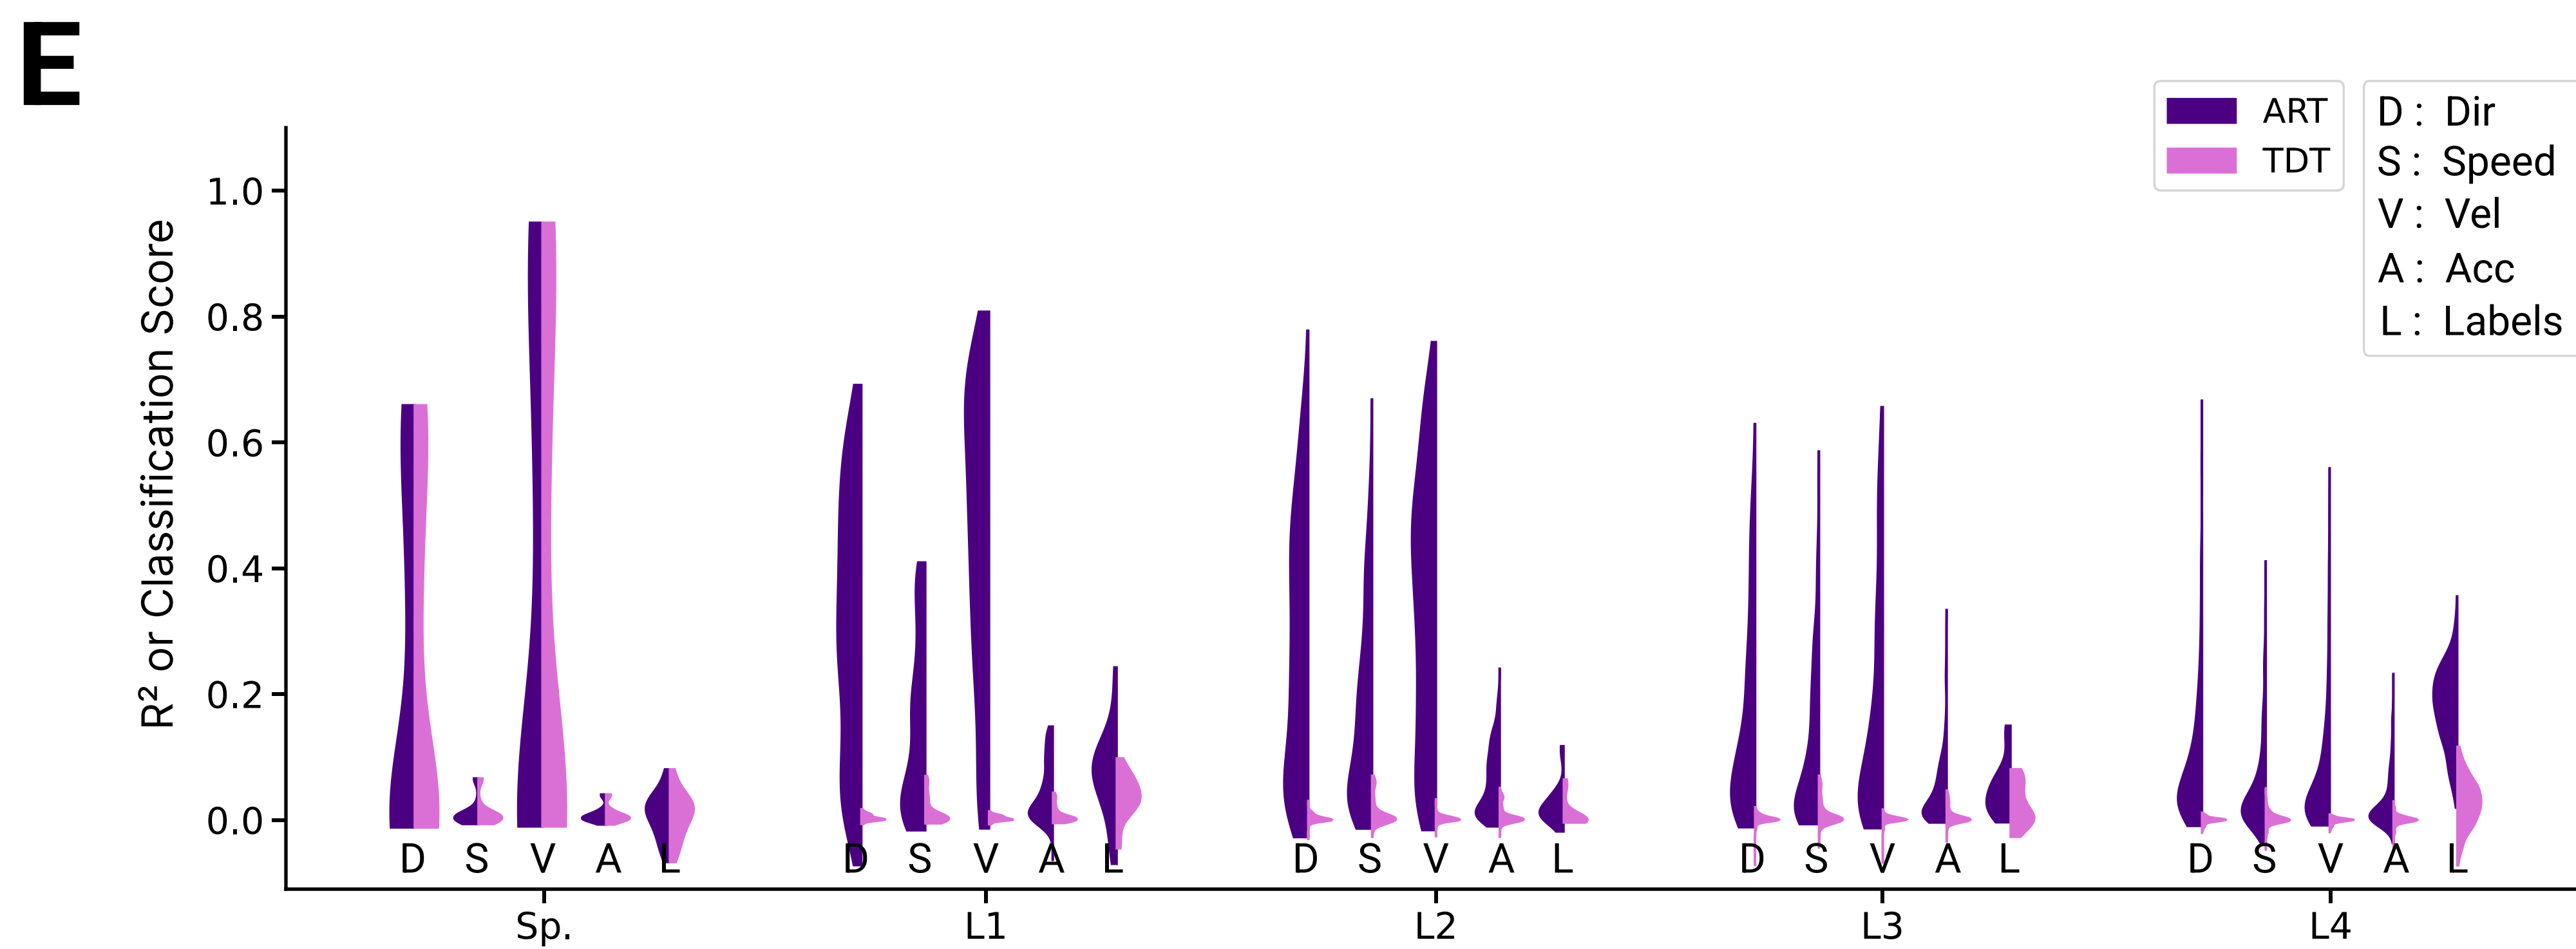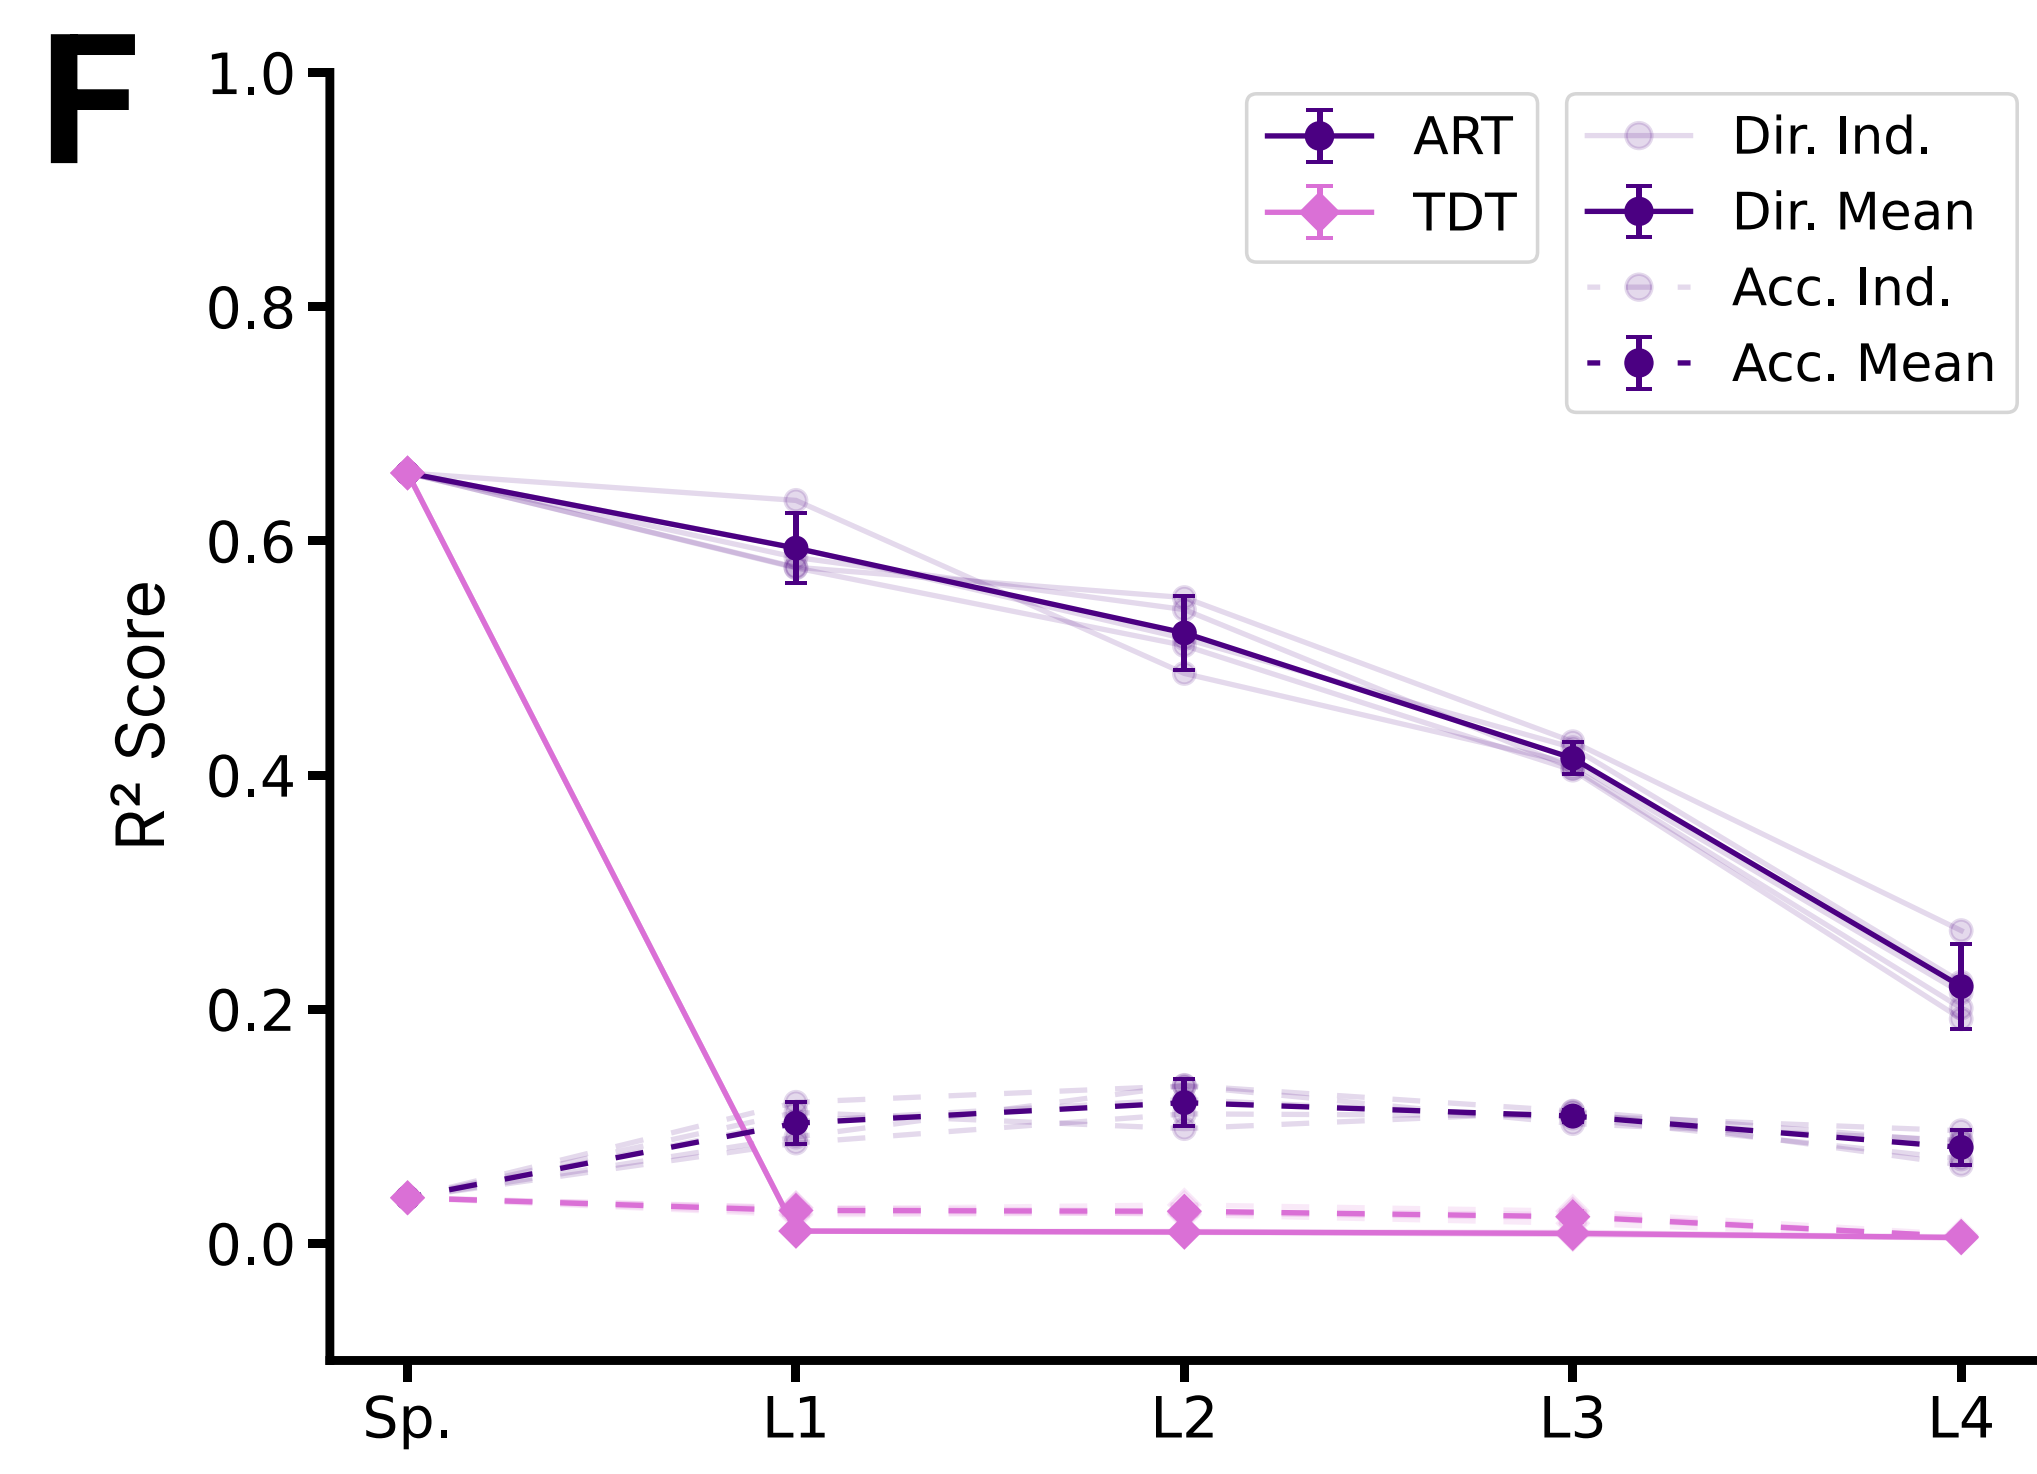

Supplement: supp [file elife_poa_e81499_Figure_5_figure_supplement_1.pdf › elife_poa_e81499_Figure_5_figure_supplement_1.pdf]

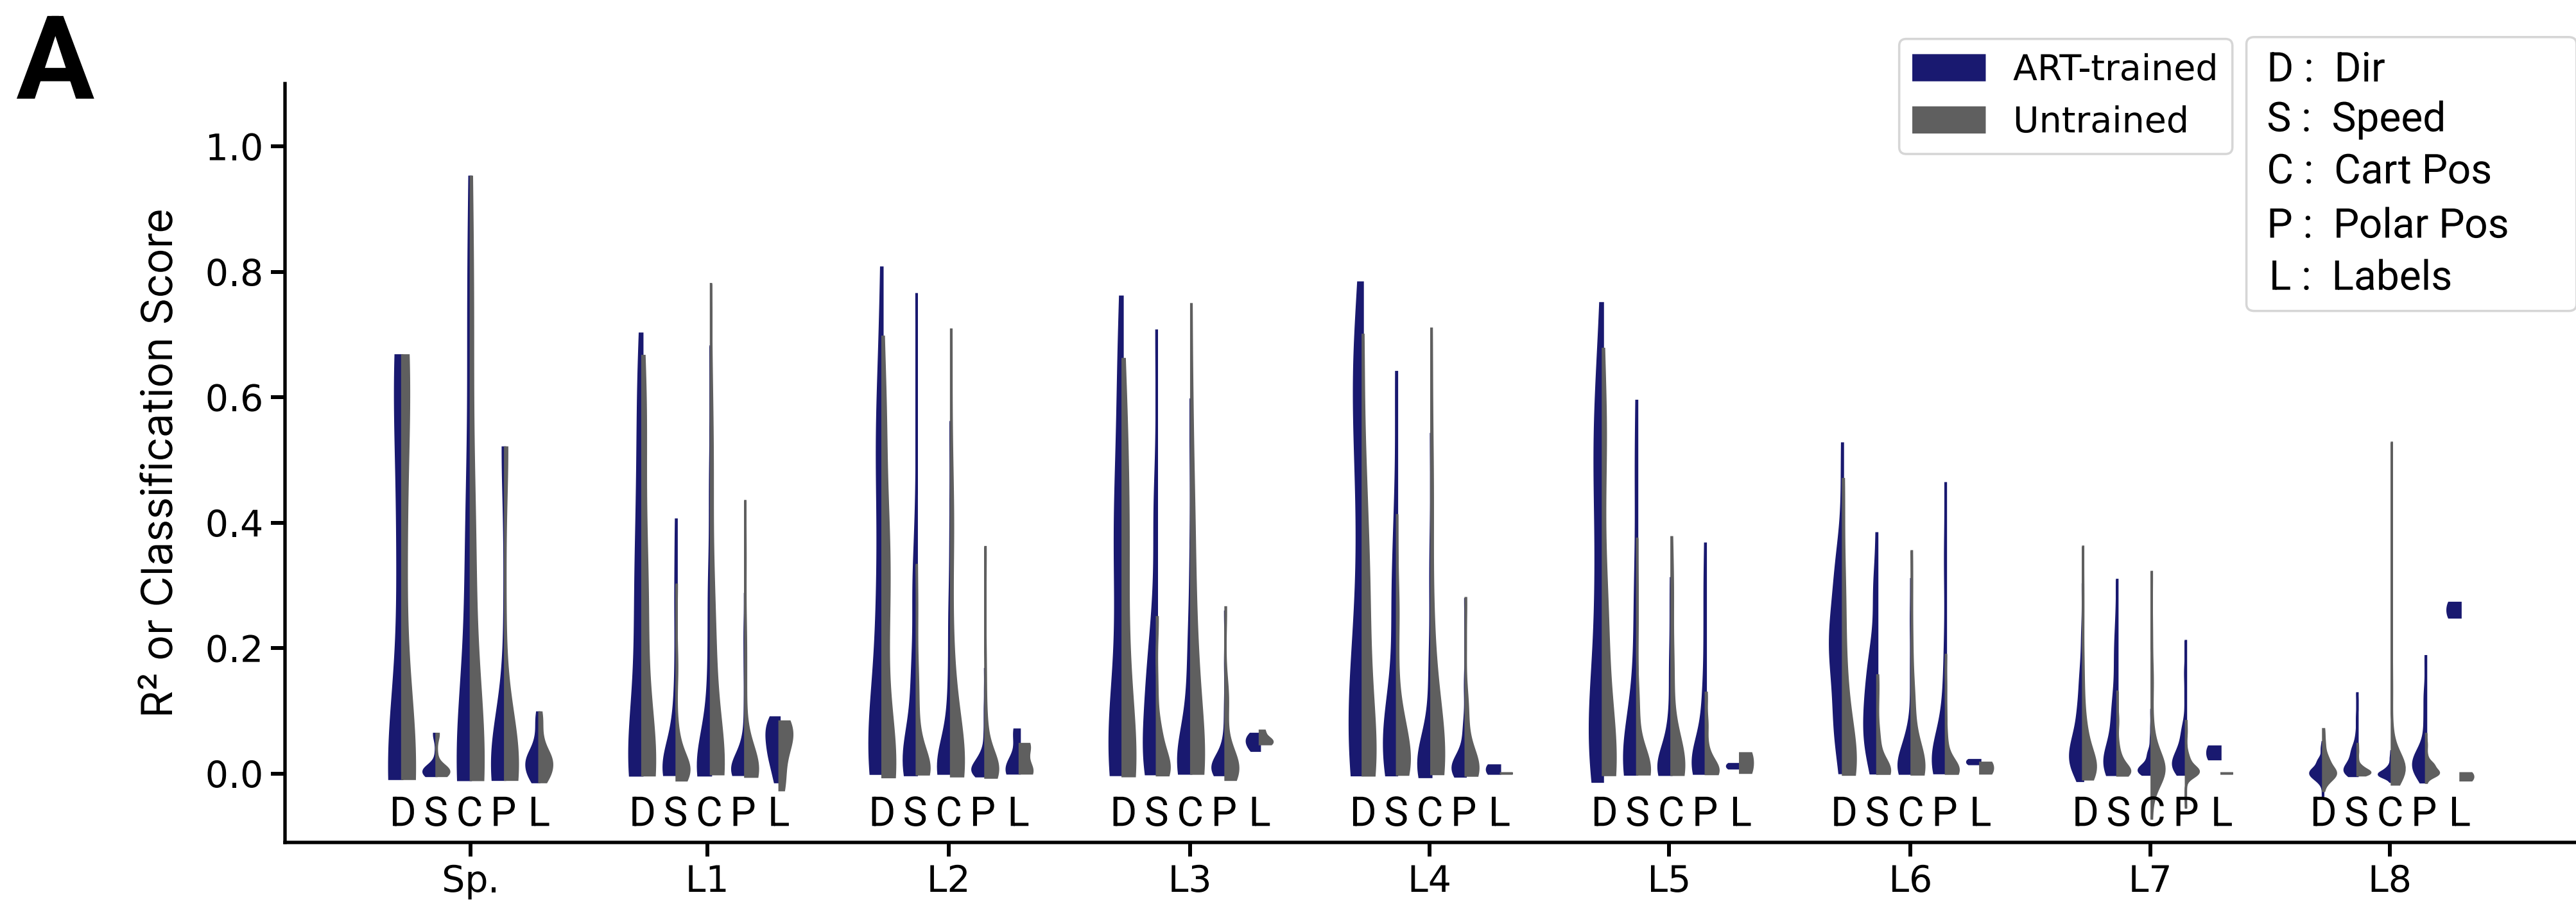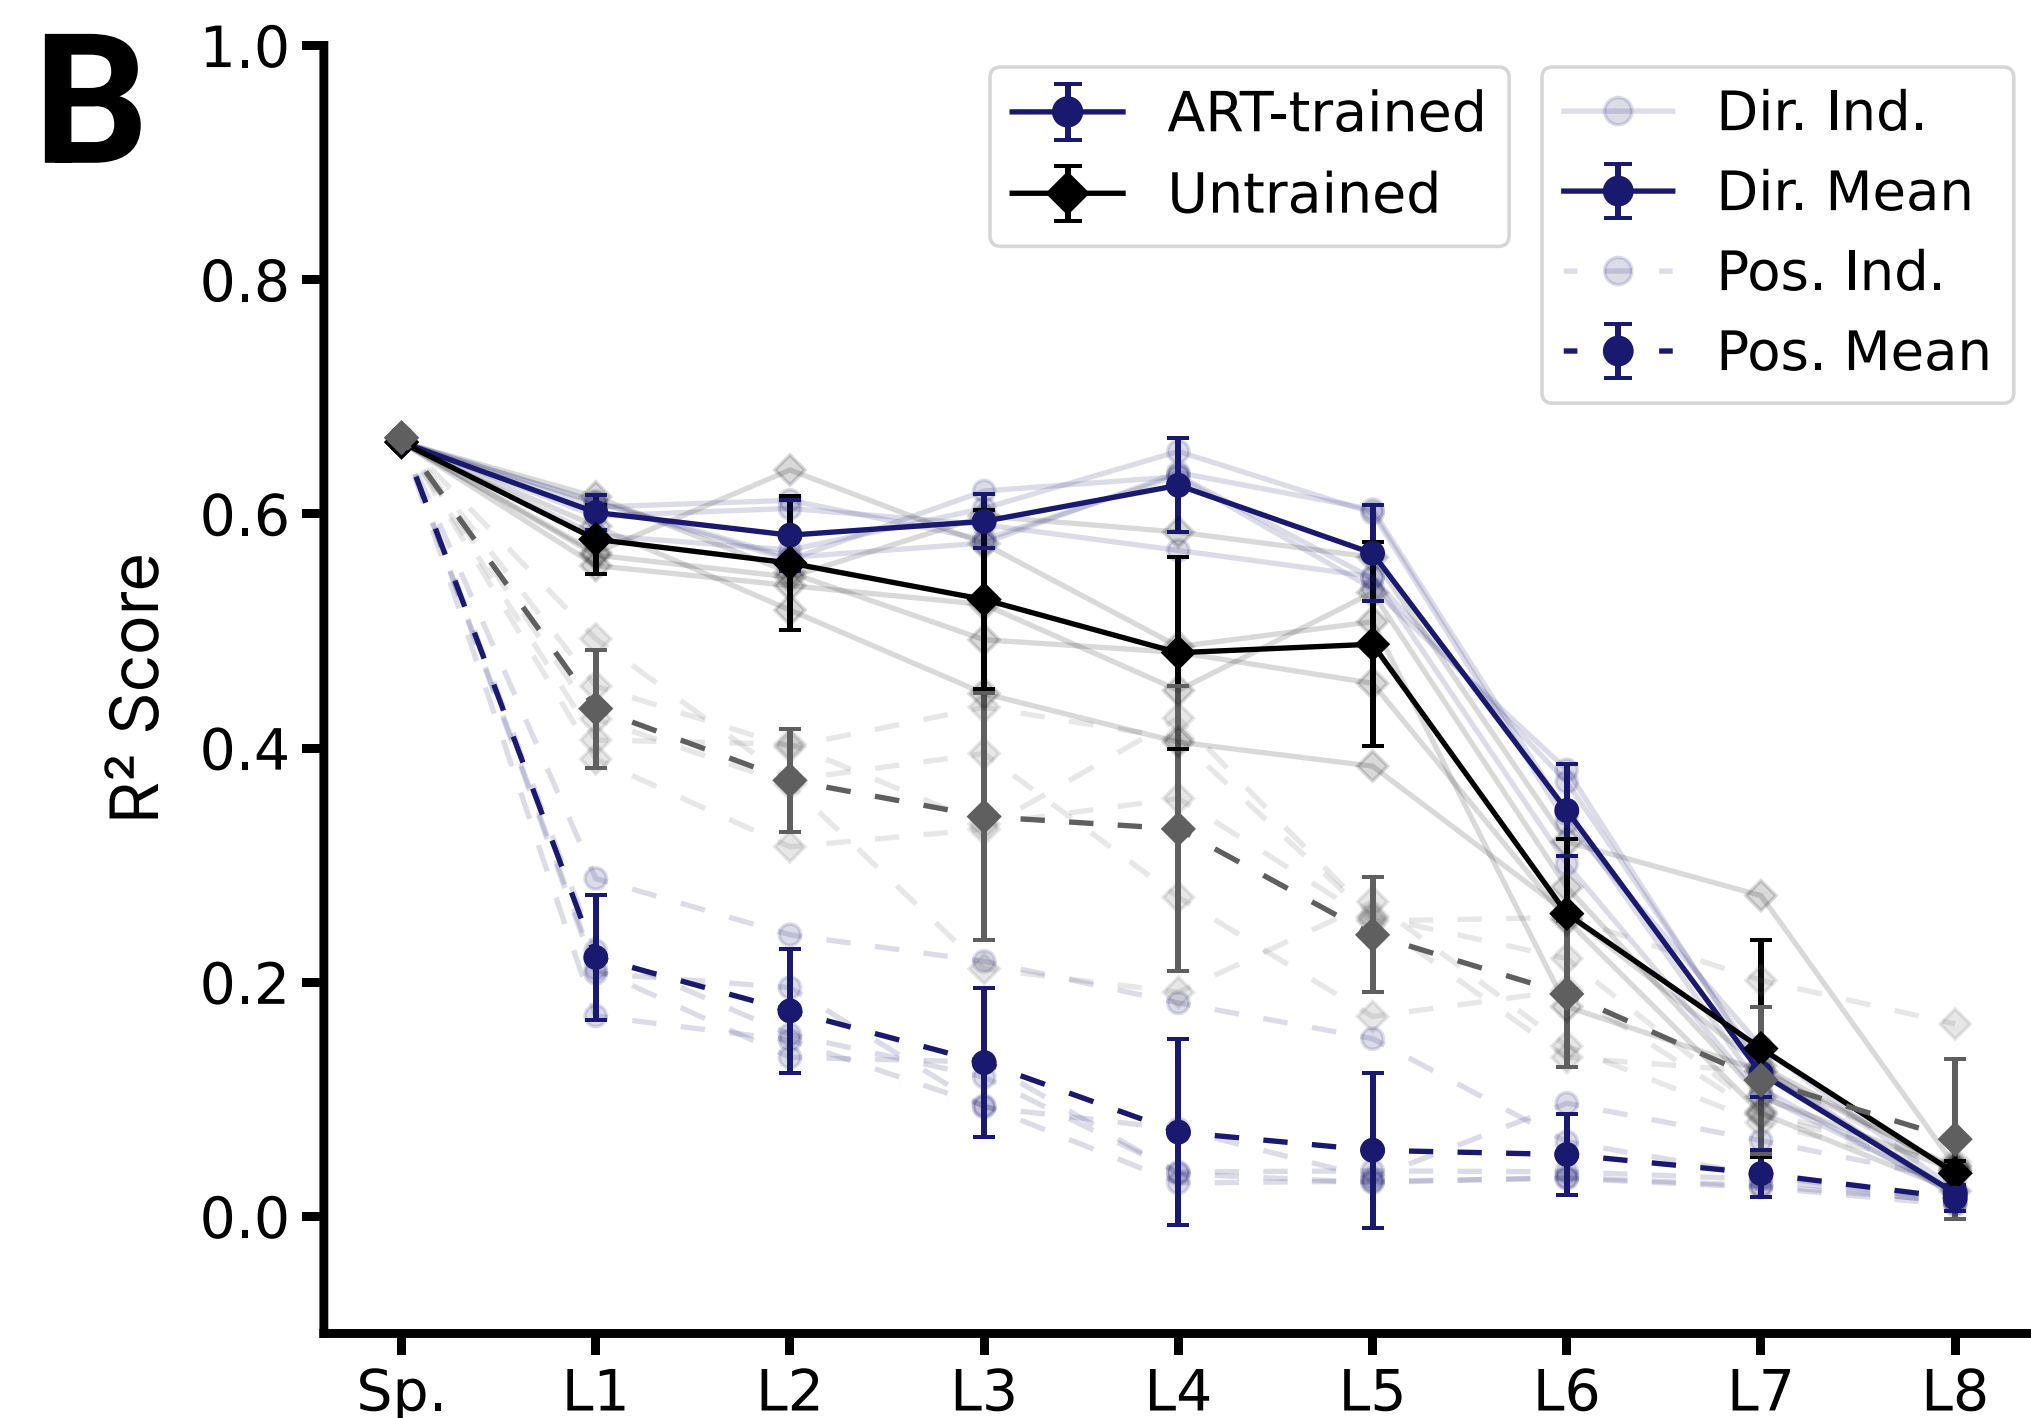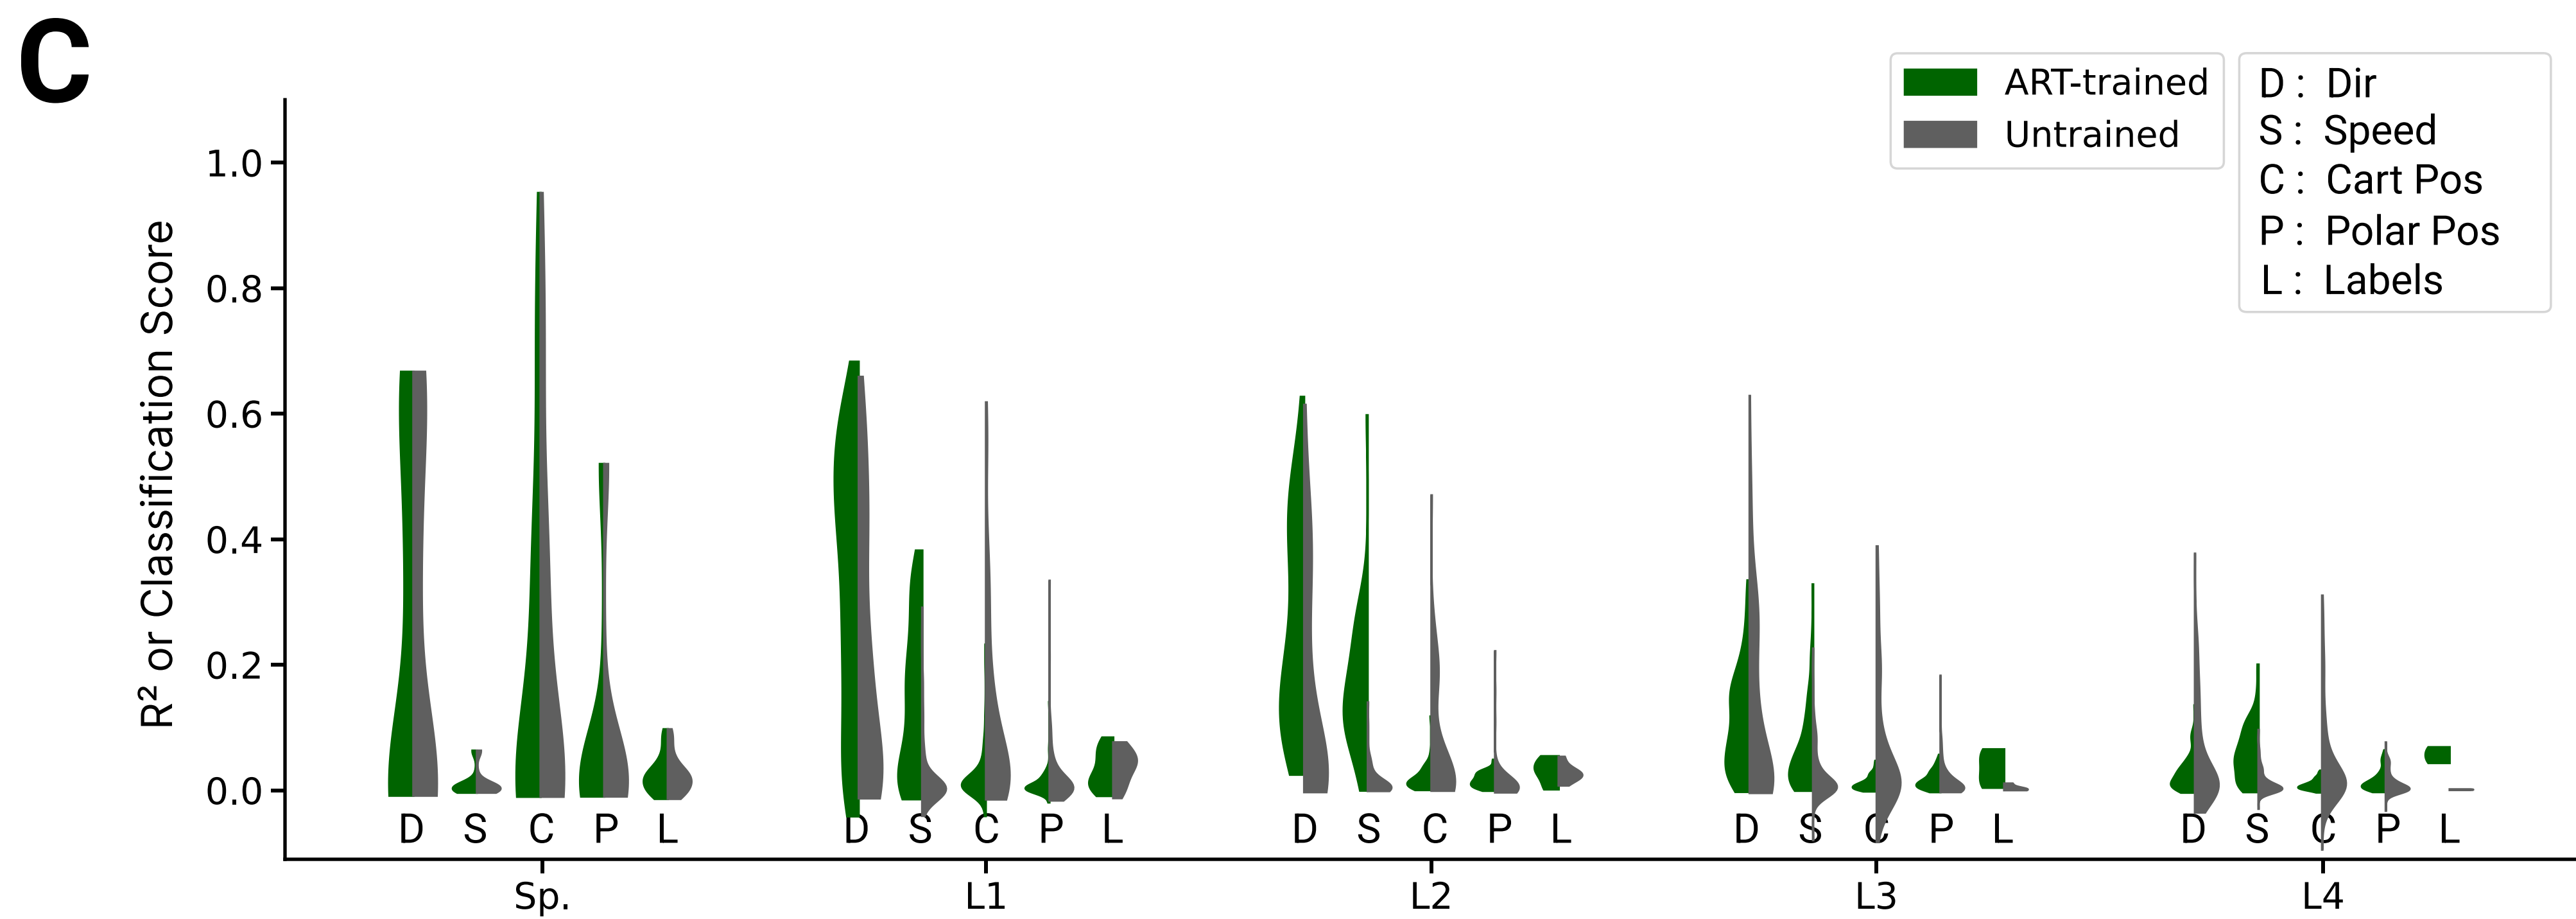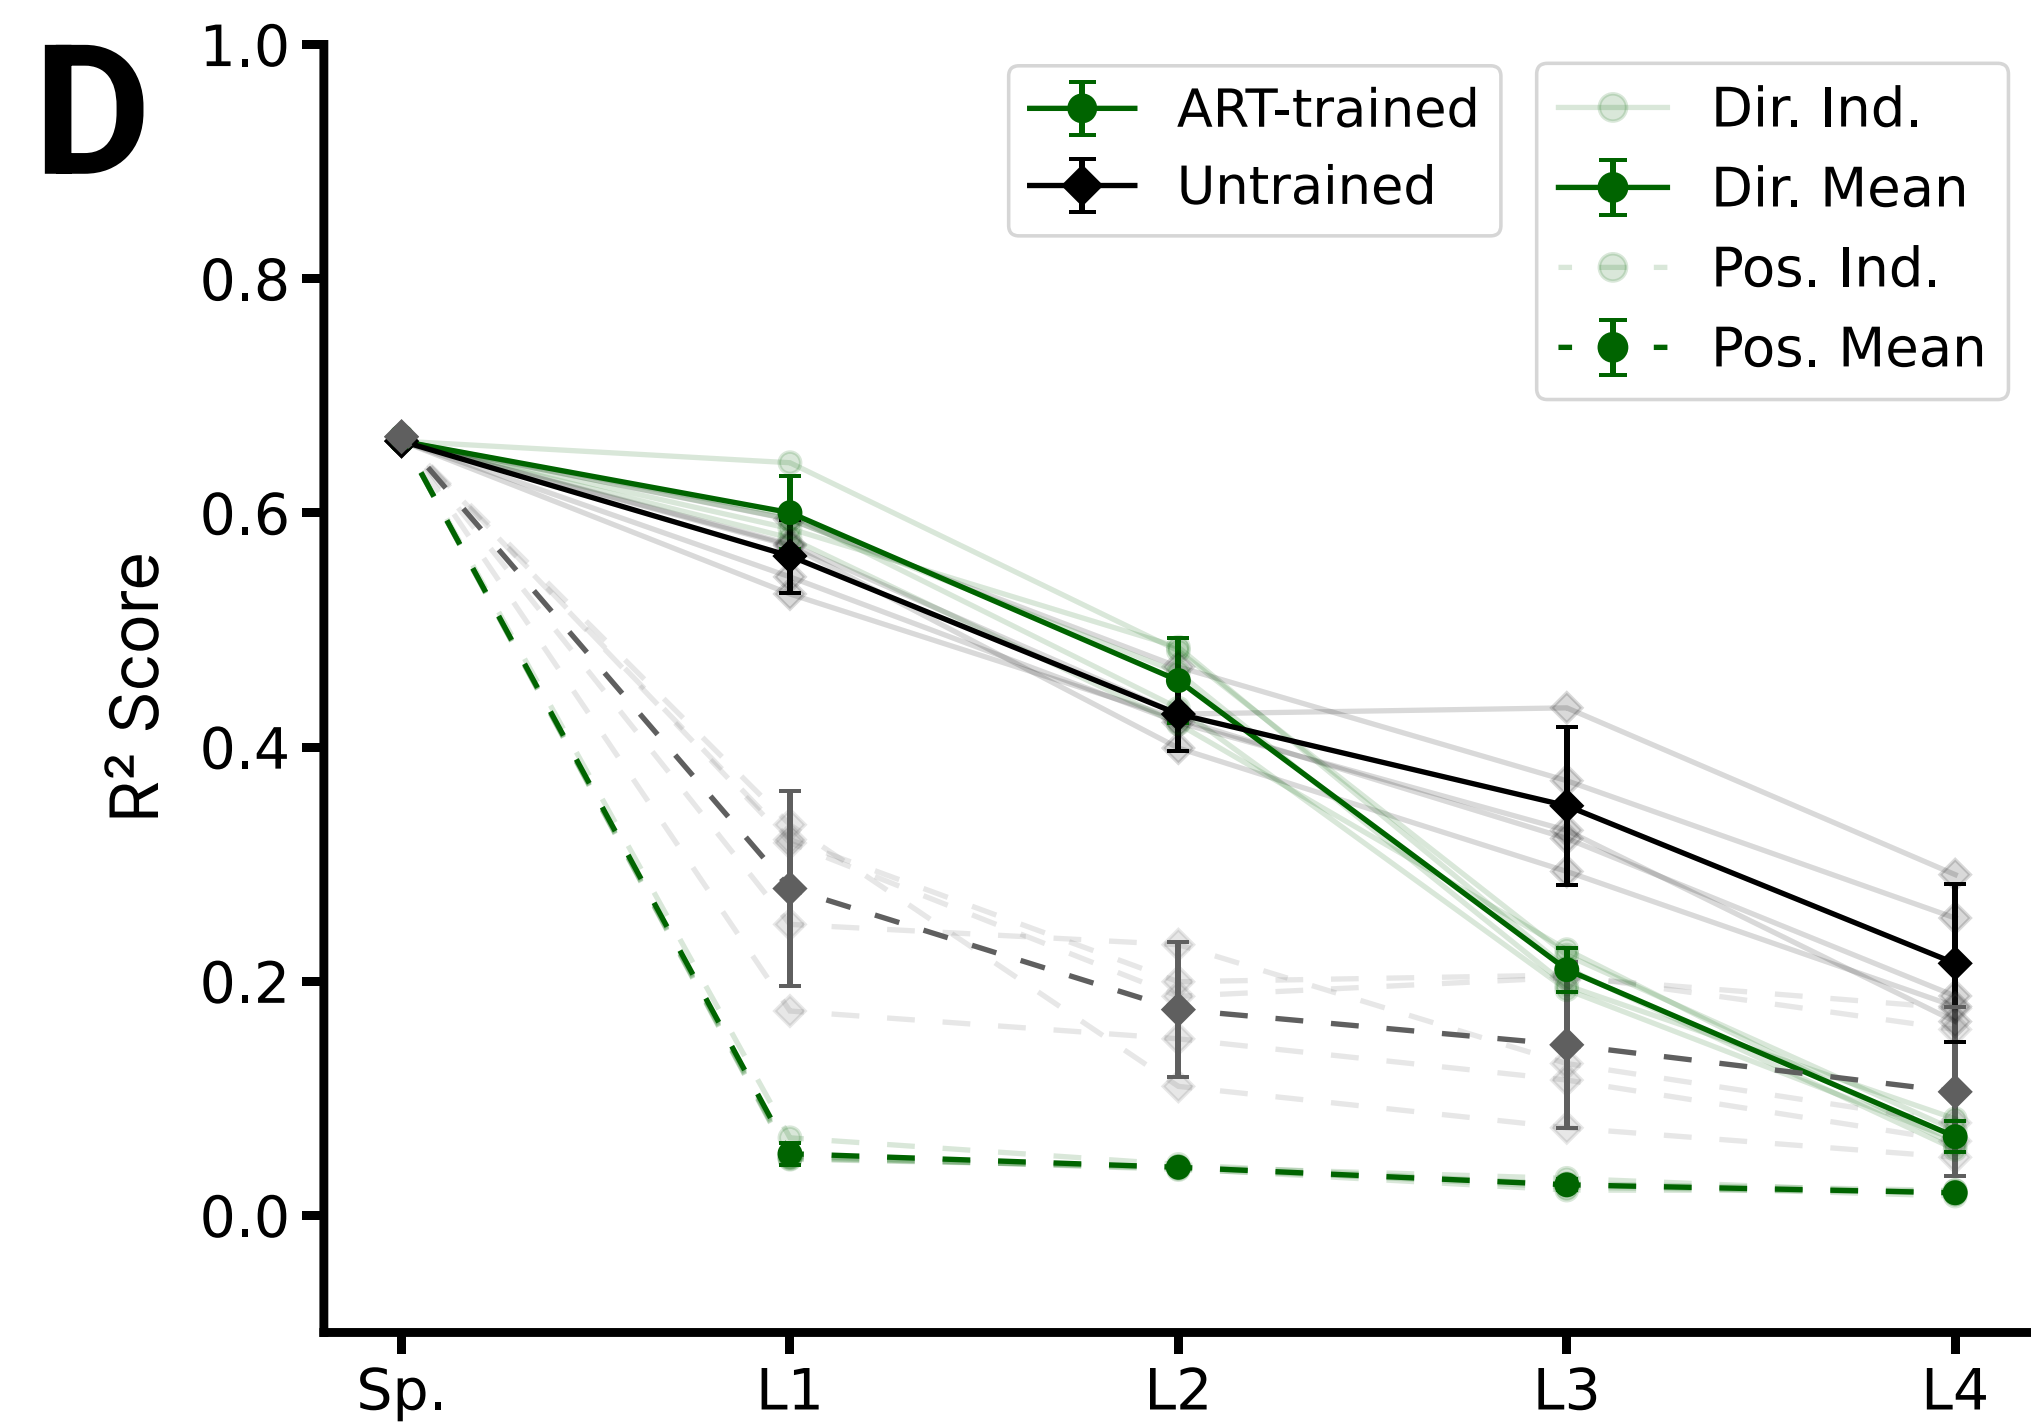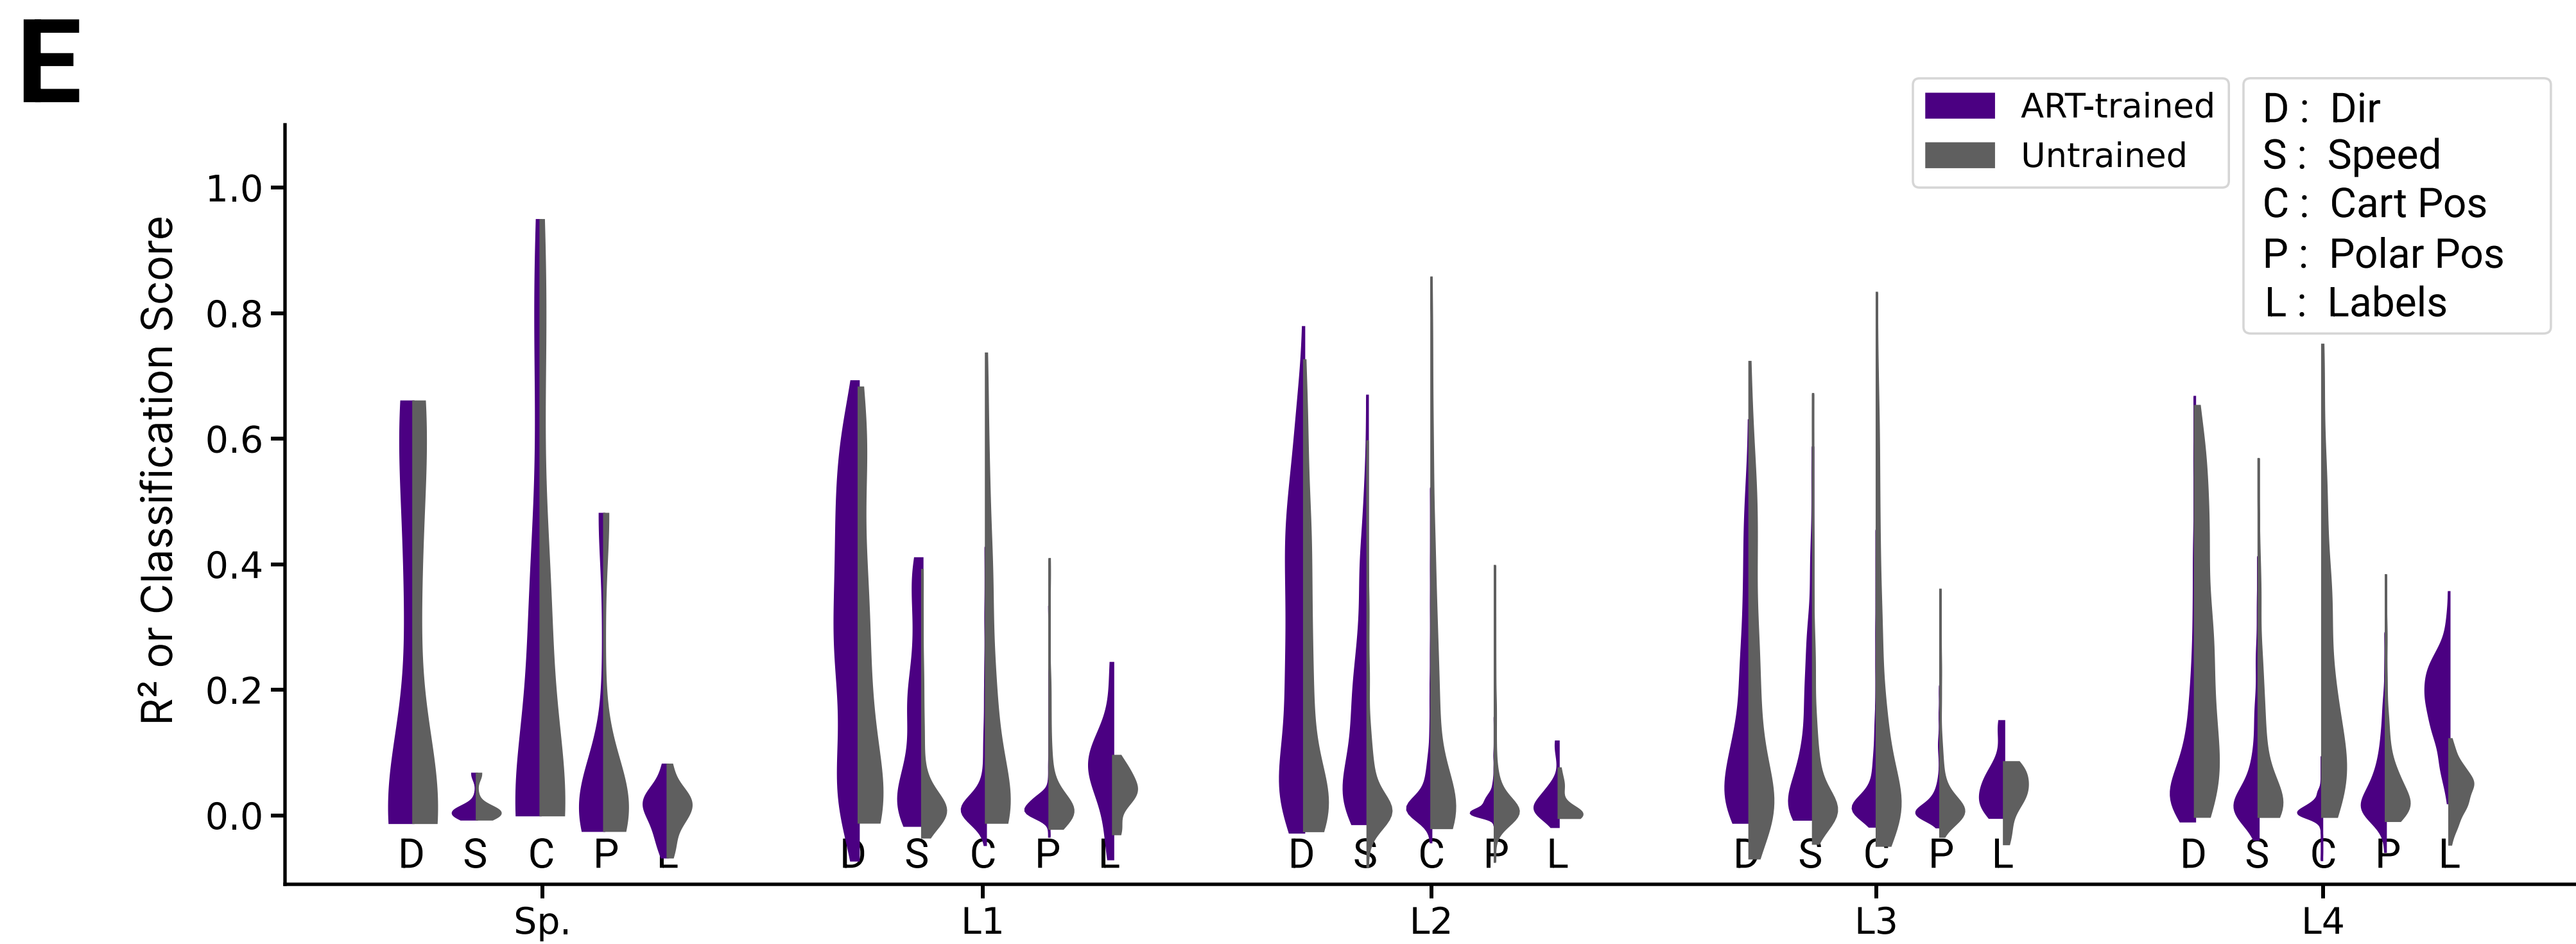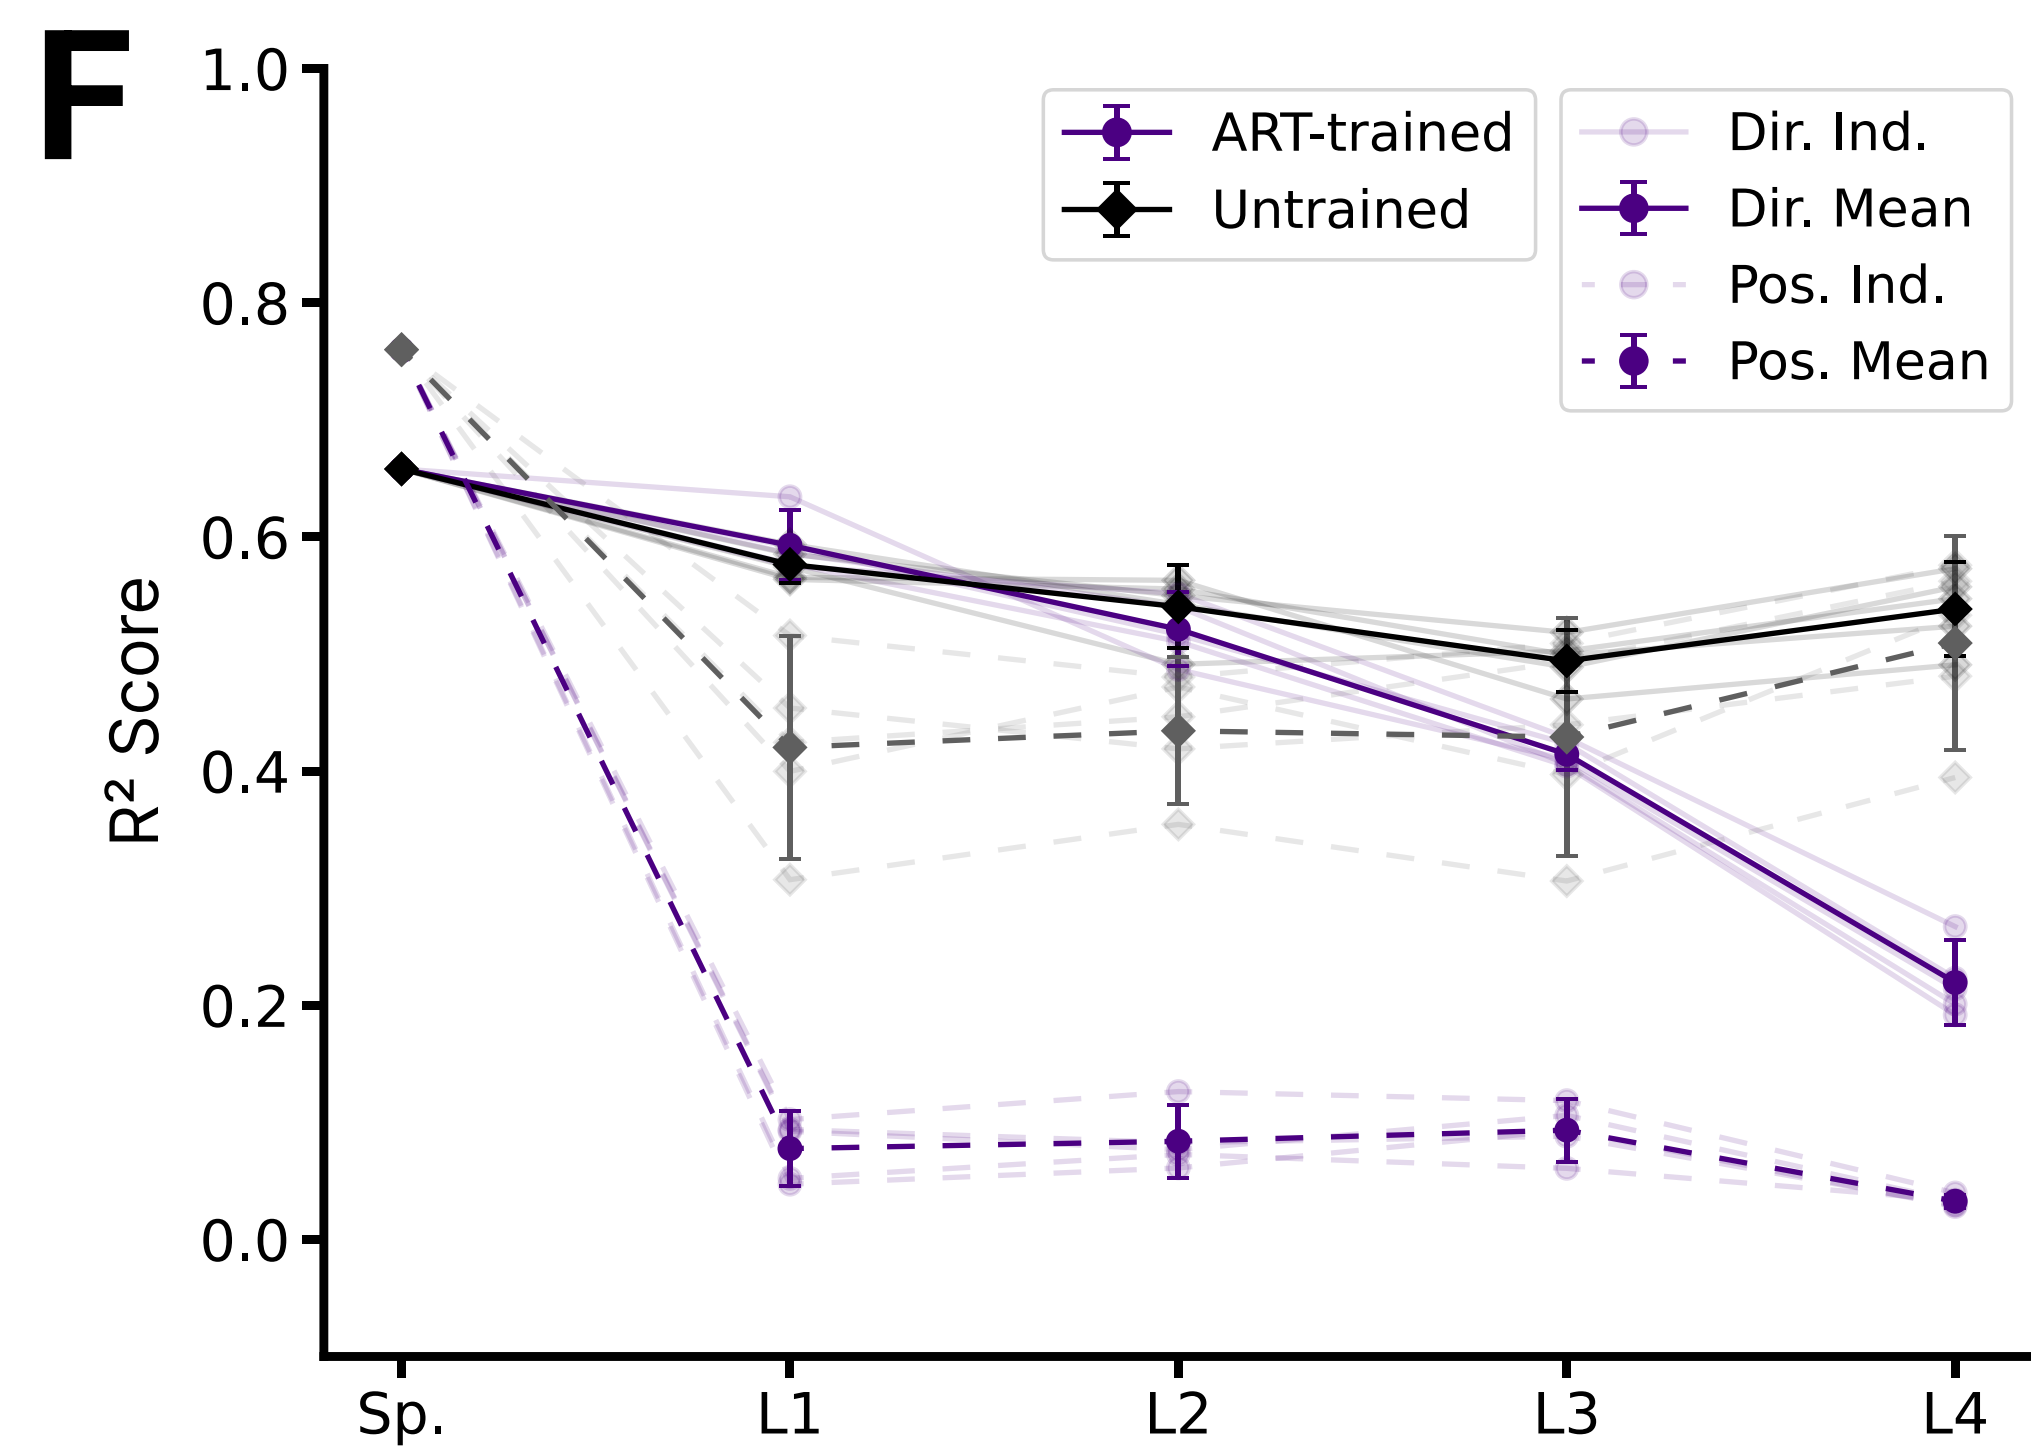

Supplement: supp [file elife_poa_e81499_Figure_5_figure_supplement_2.pdf › elife_poa_e81499_Figure_5_figure_supplement_2.pdf]

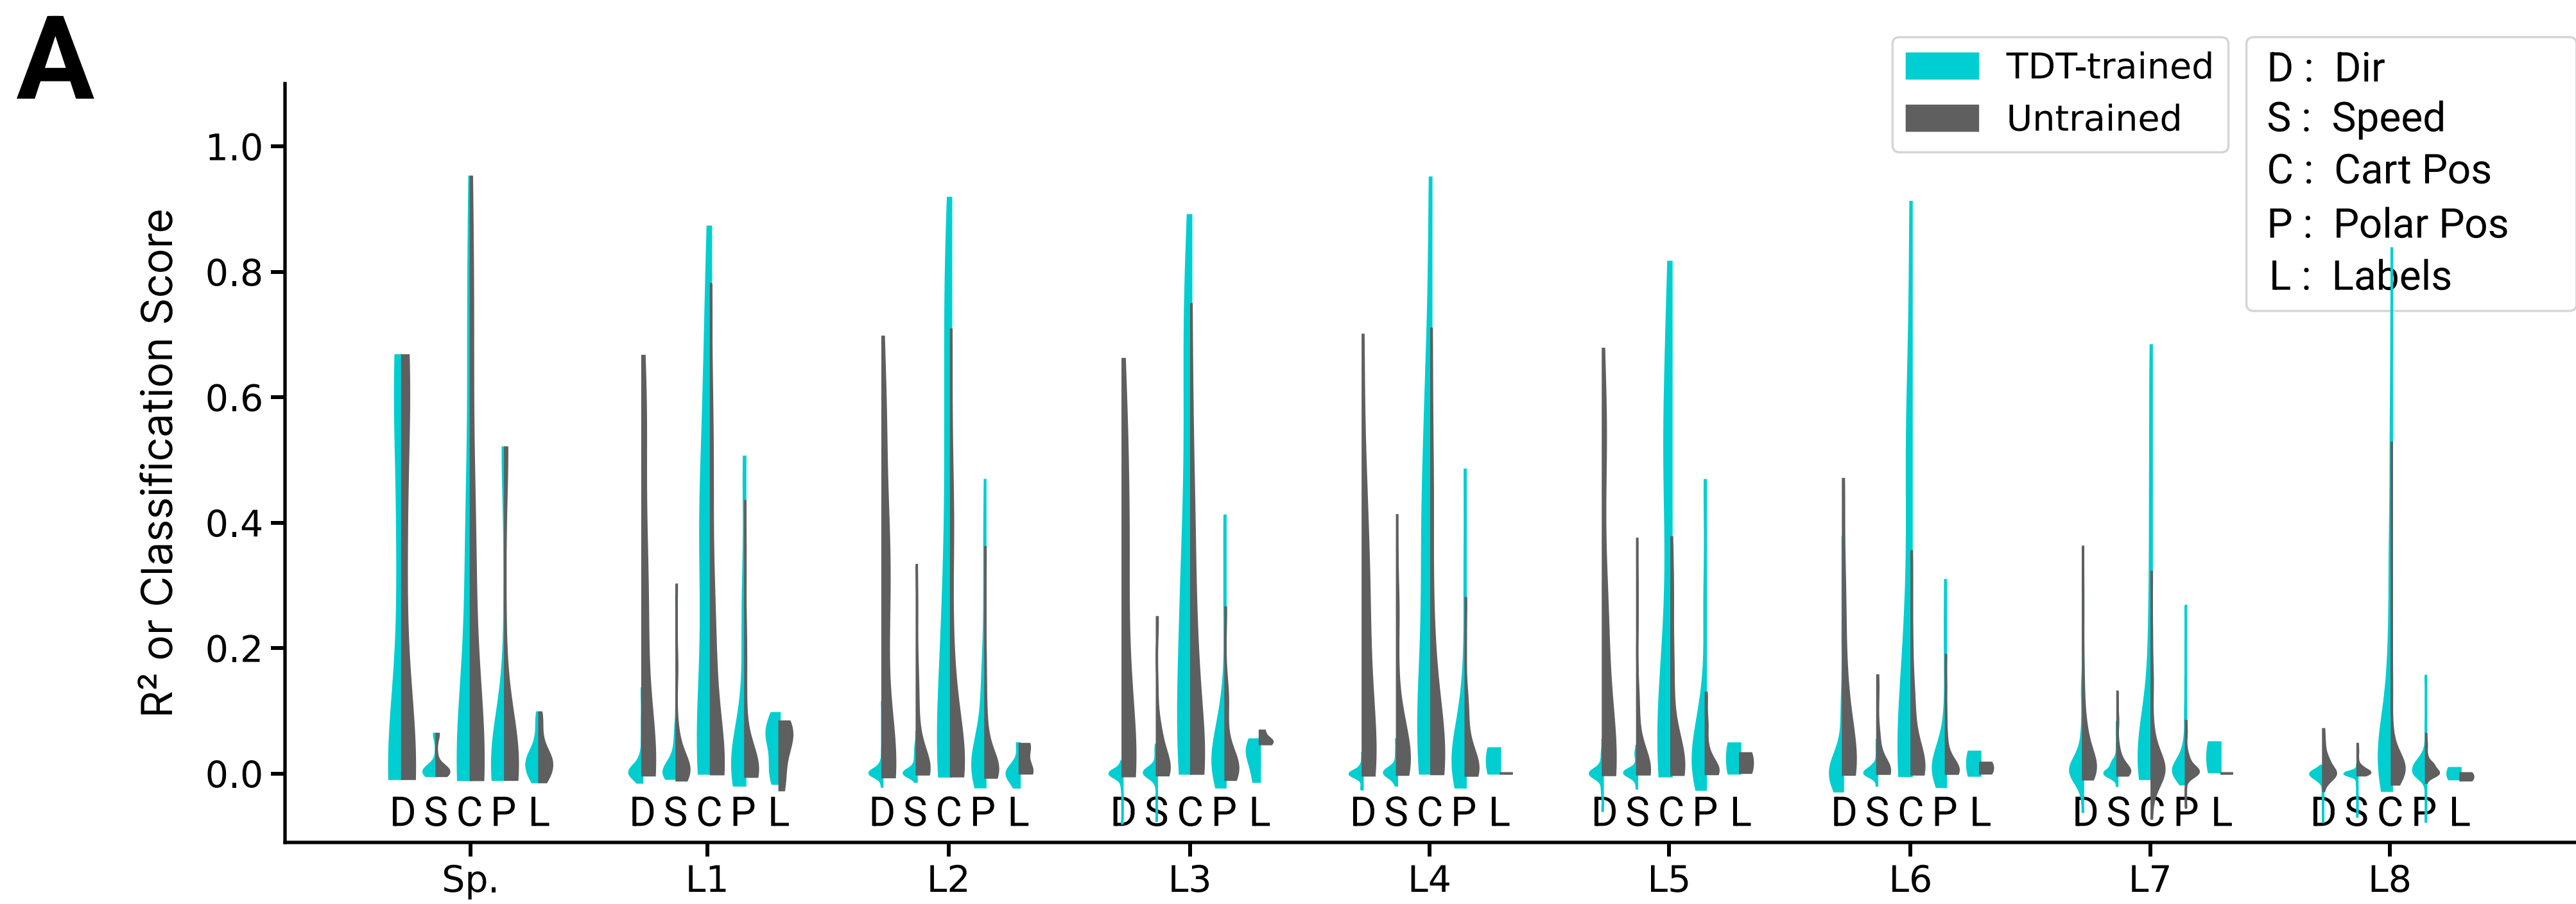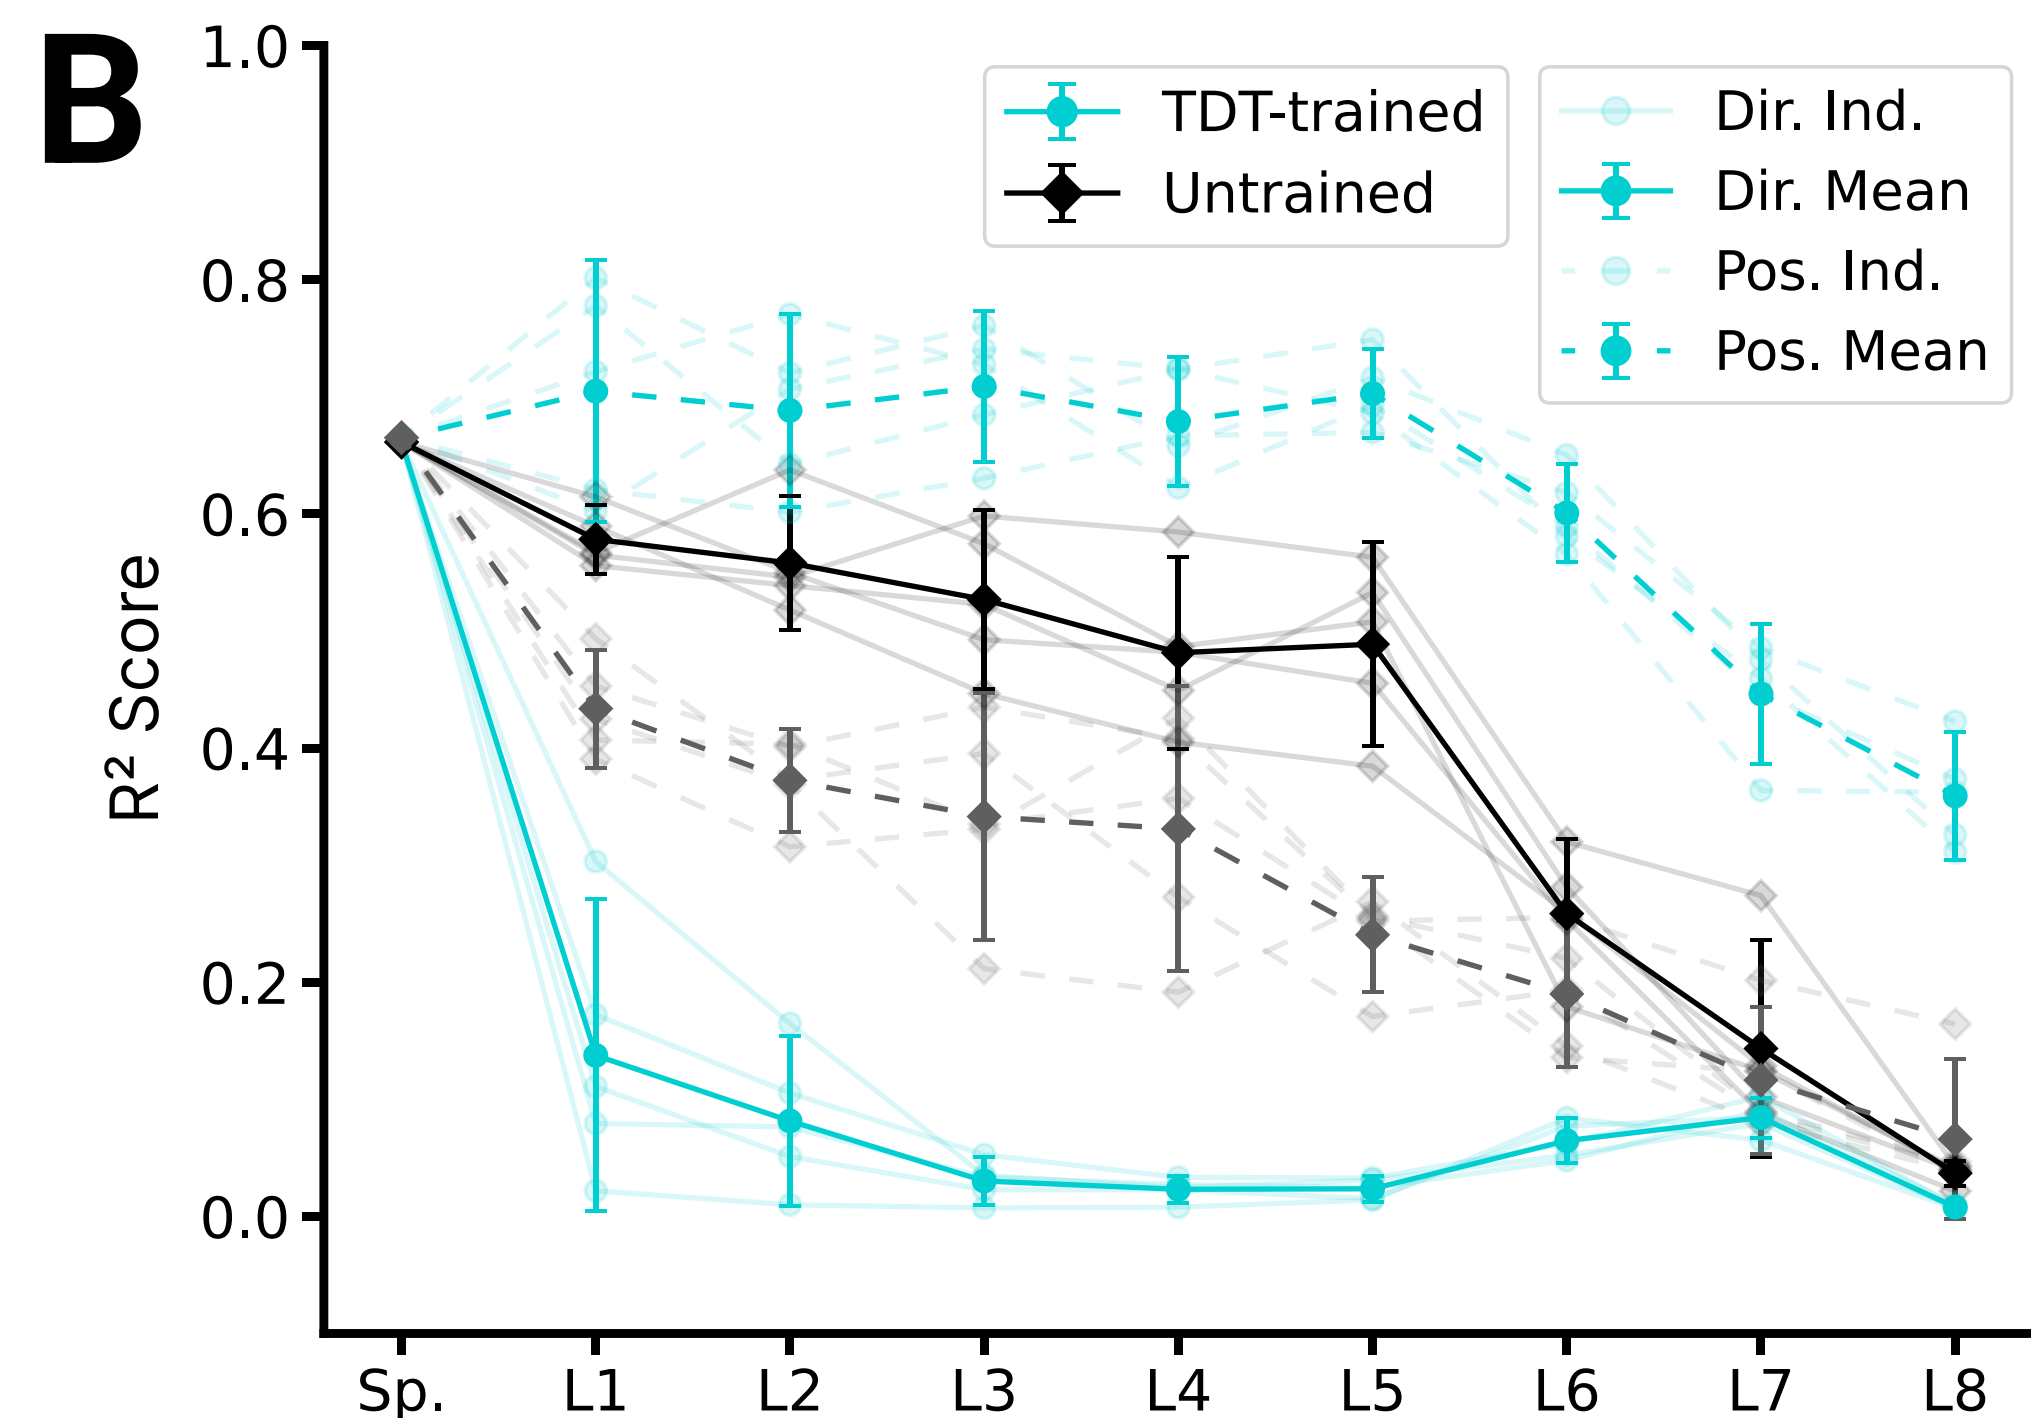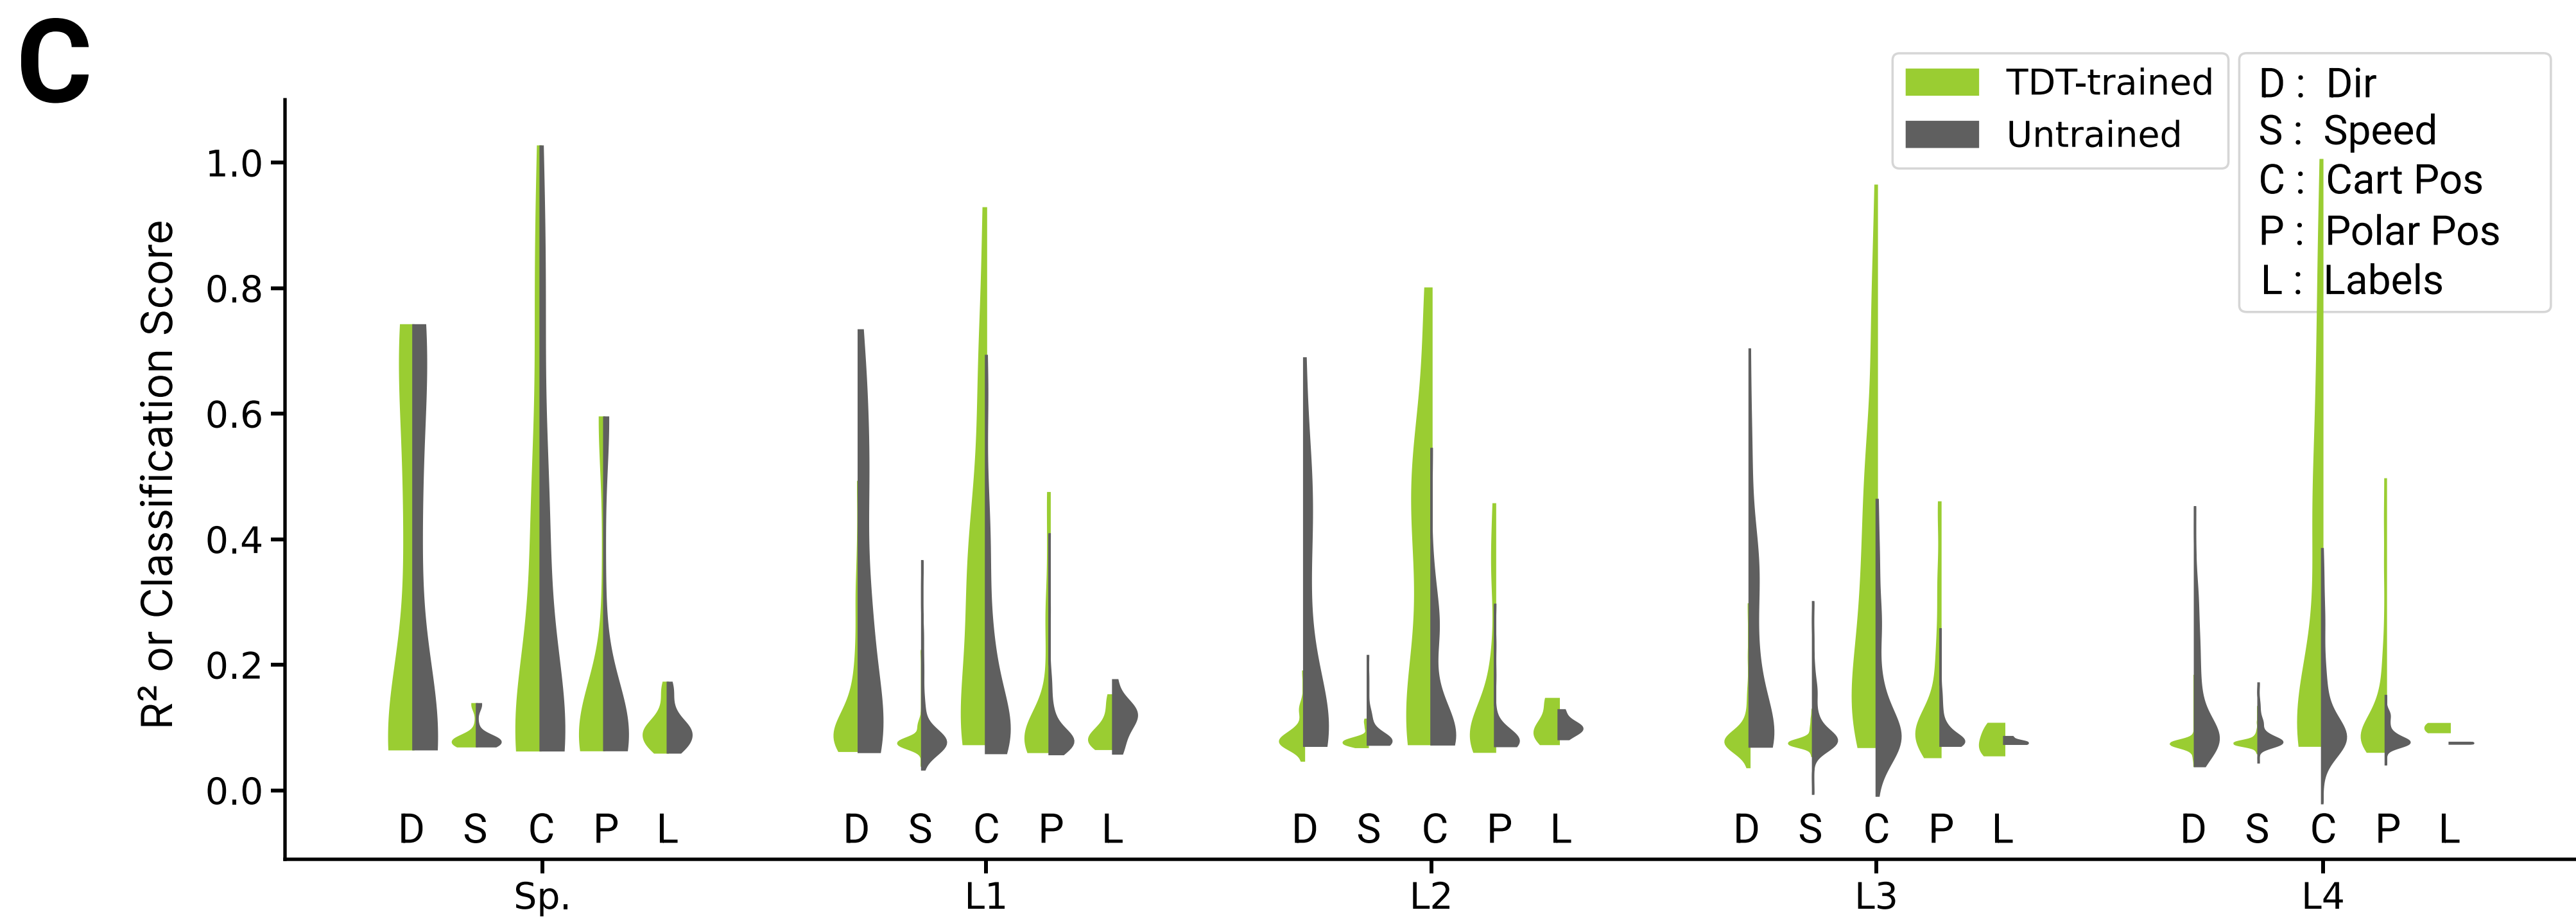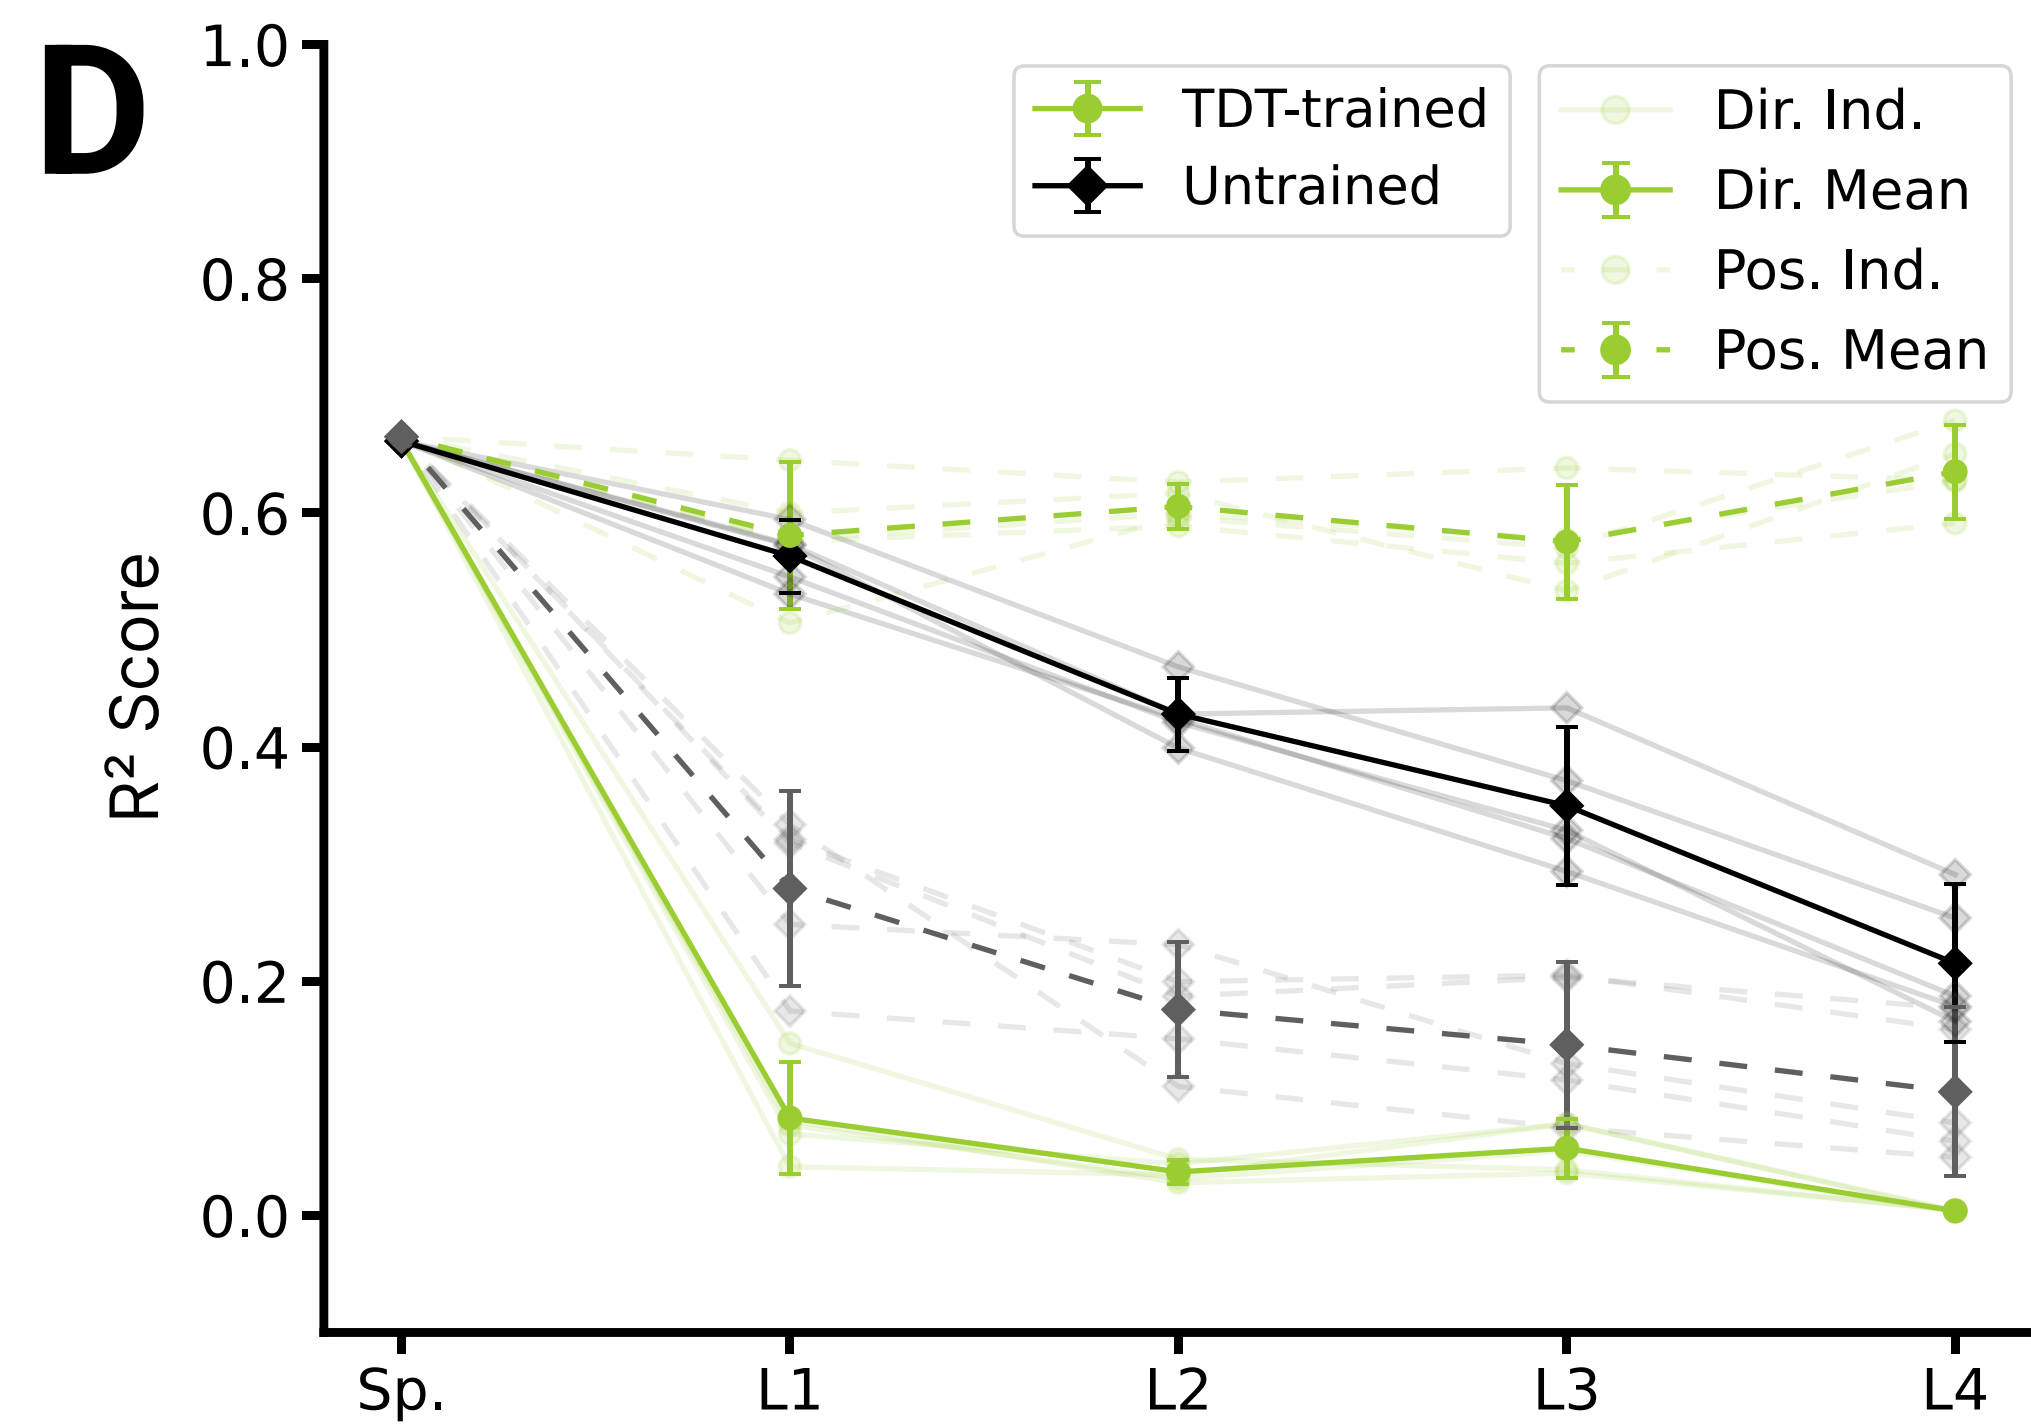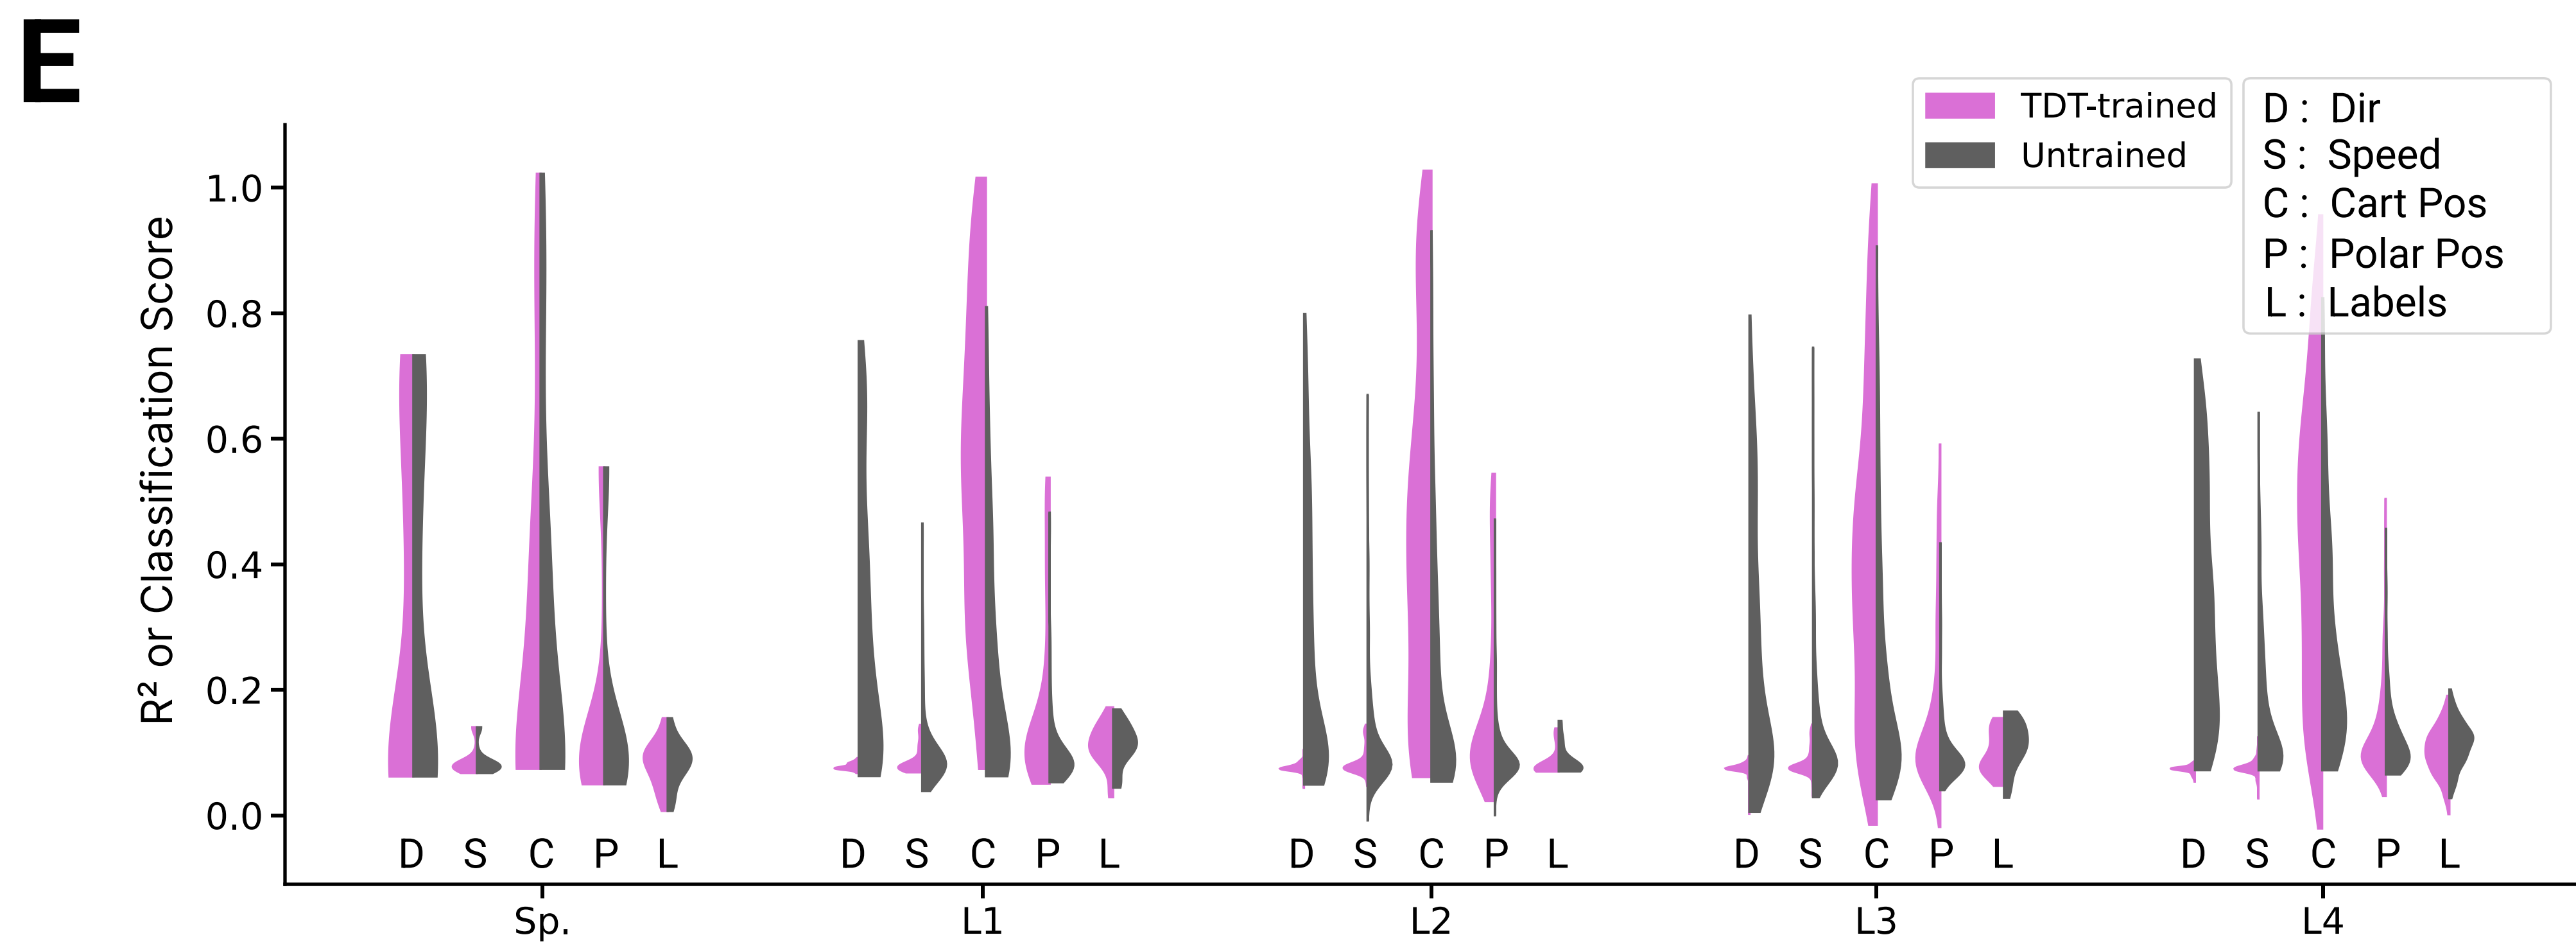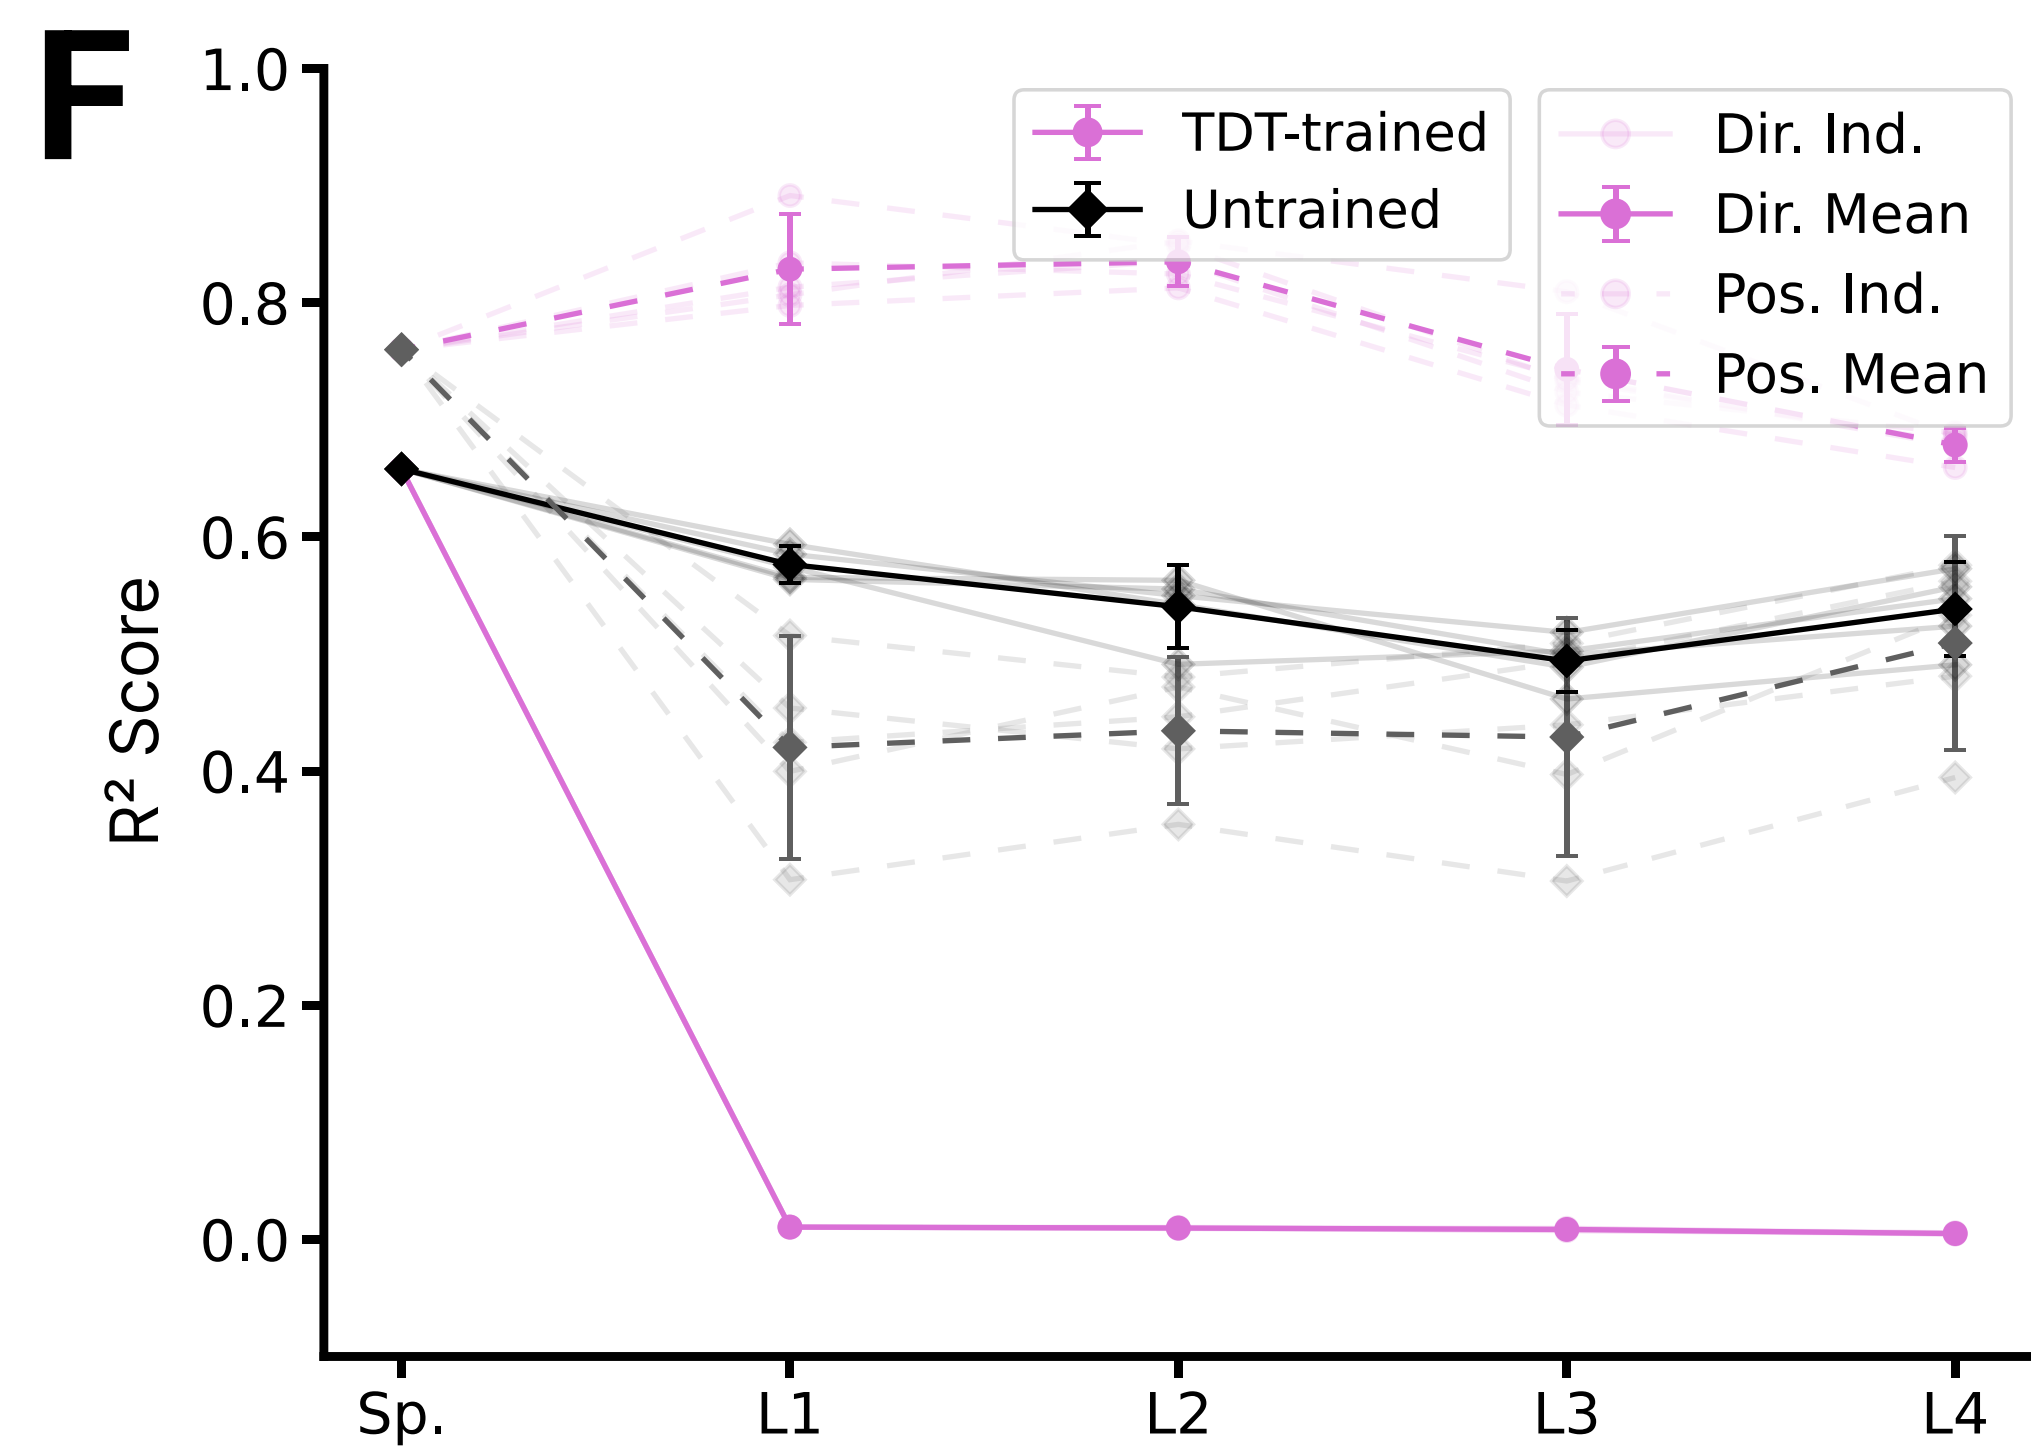

Supplement: supp [file elife_poa_e81499_Figure_5_figure_supplement_3.pdf › elife_poa_e81499_Figure_5_figure_supplement_3.pdf]

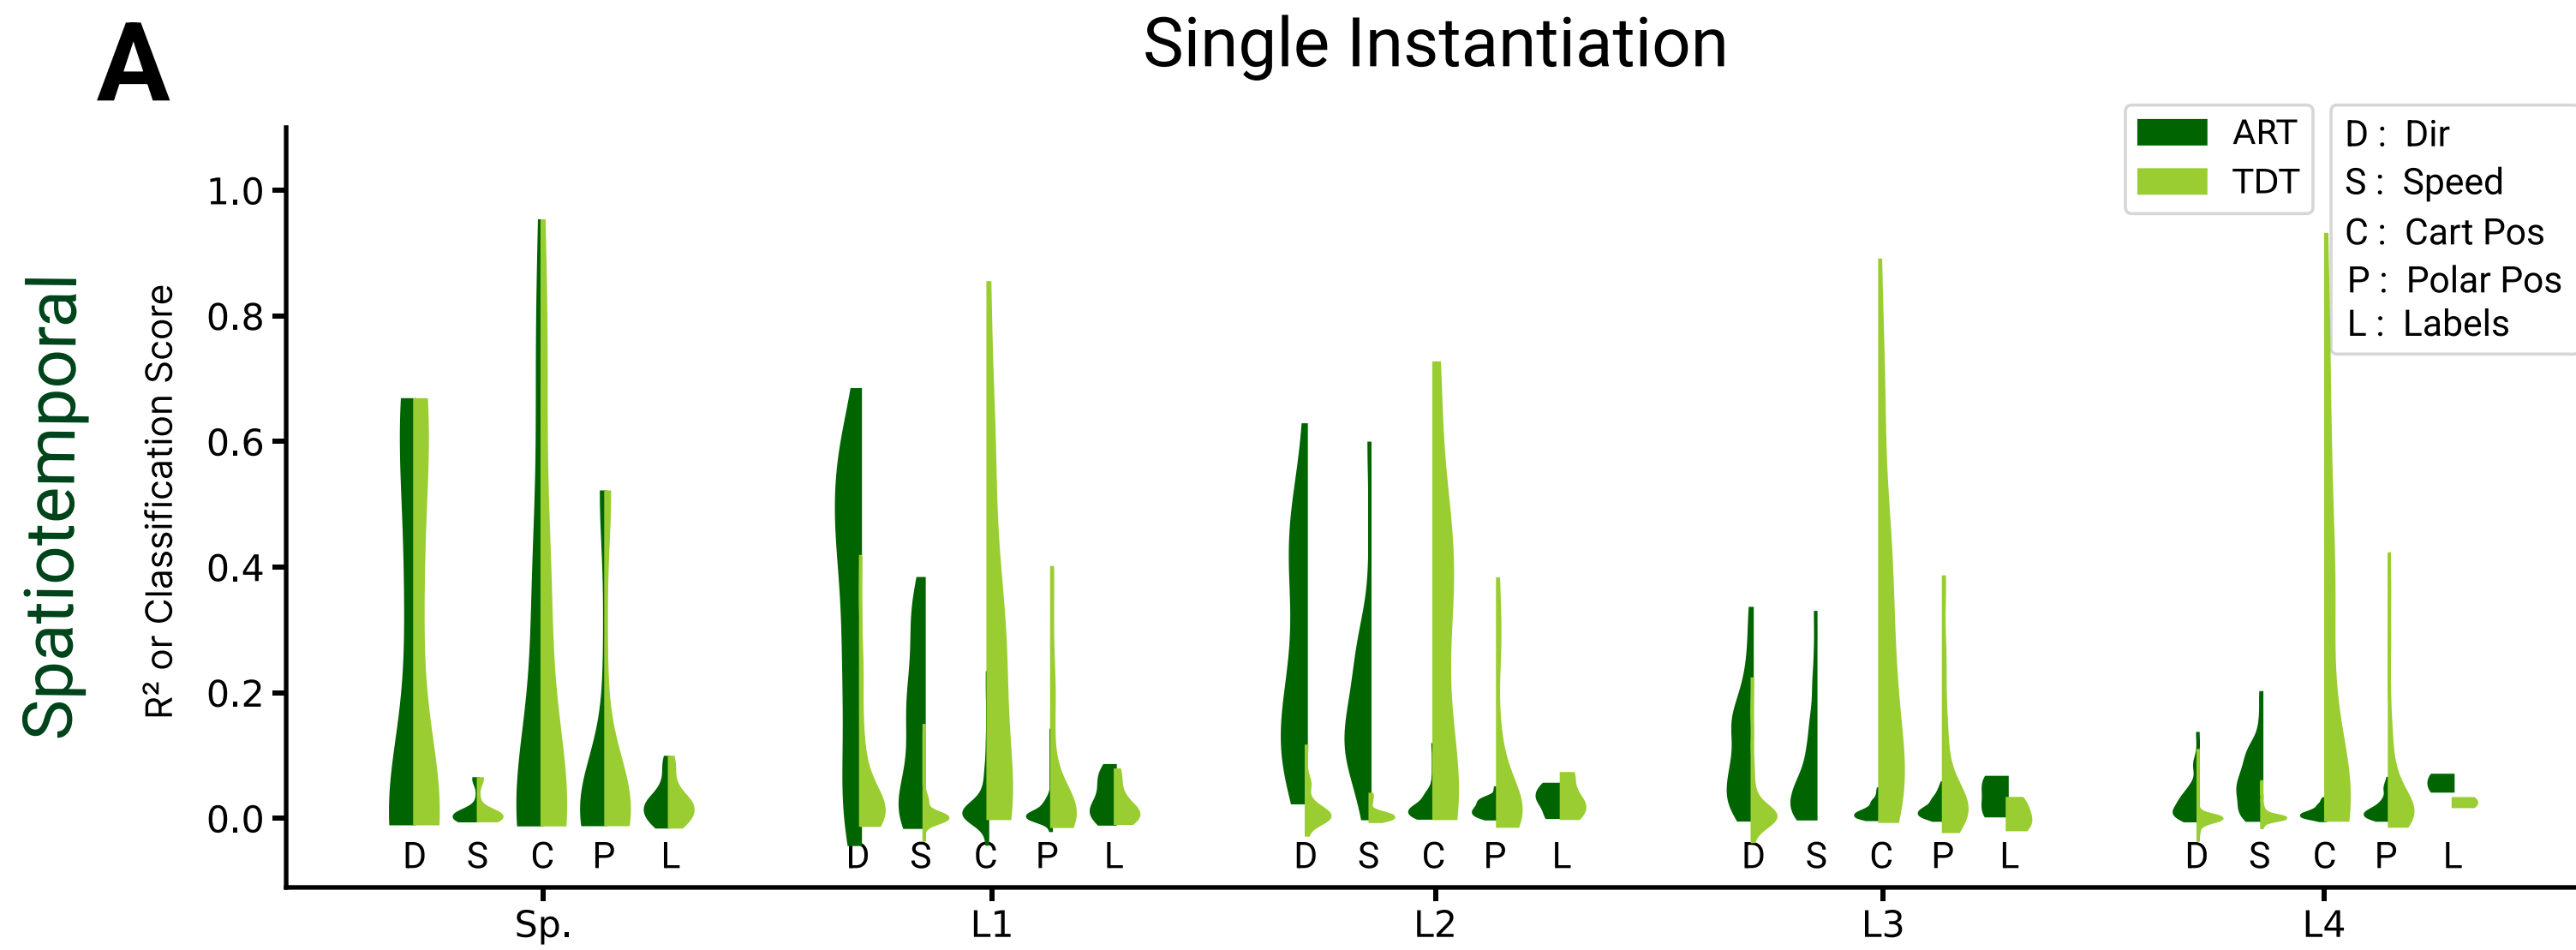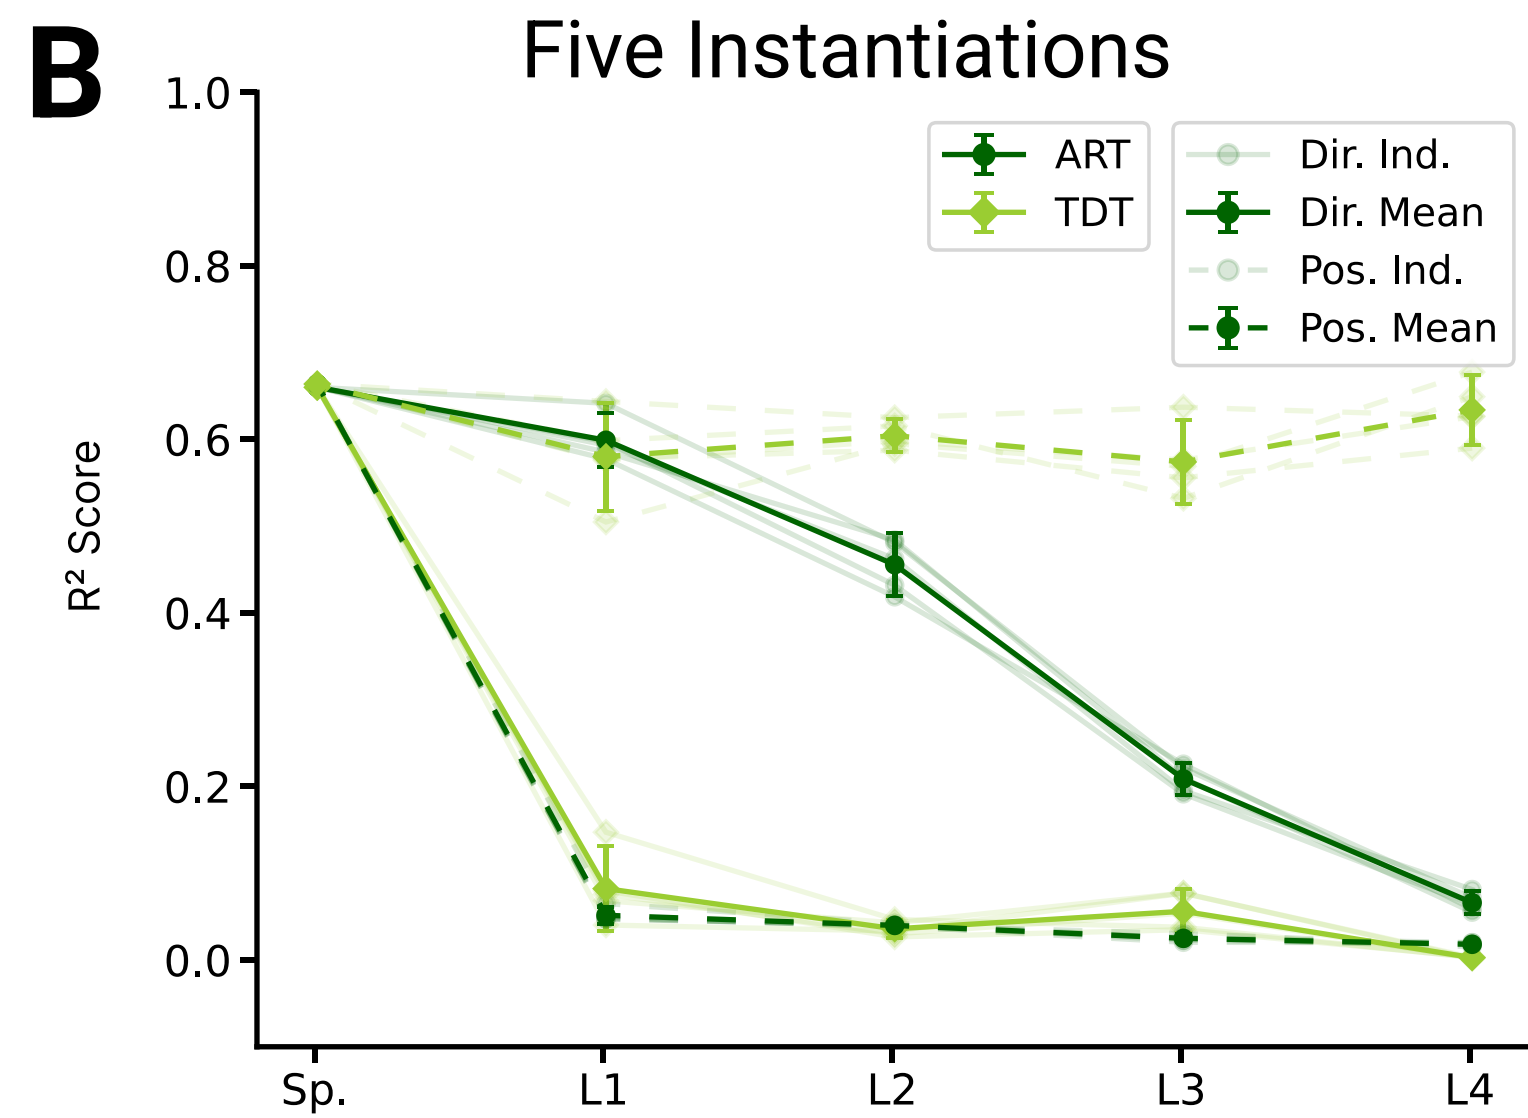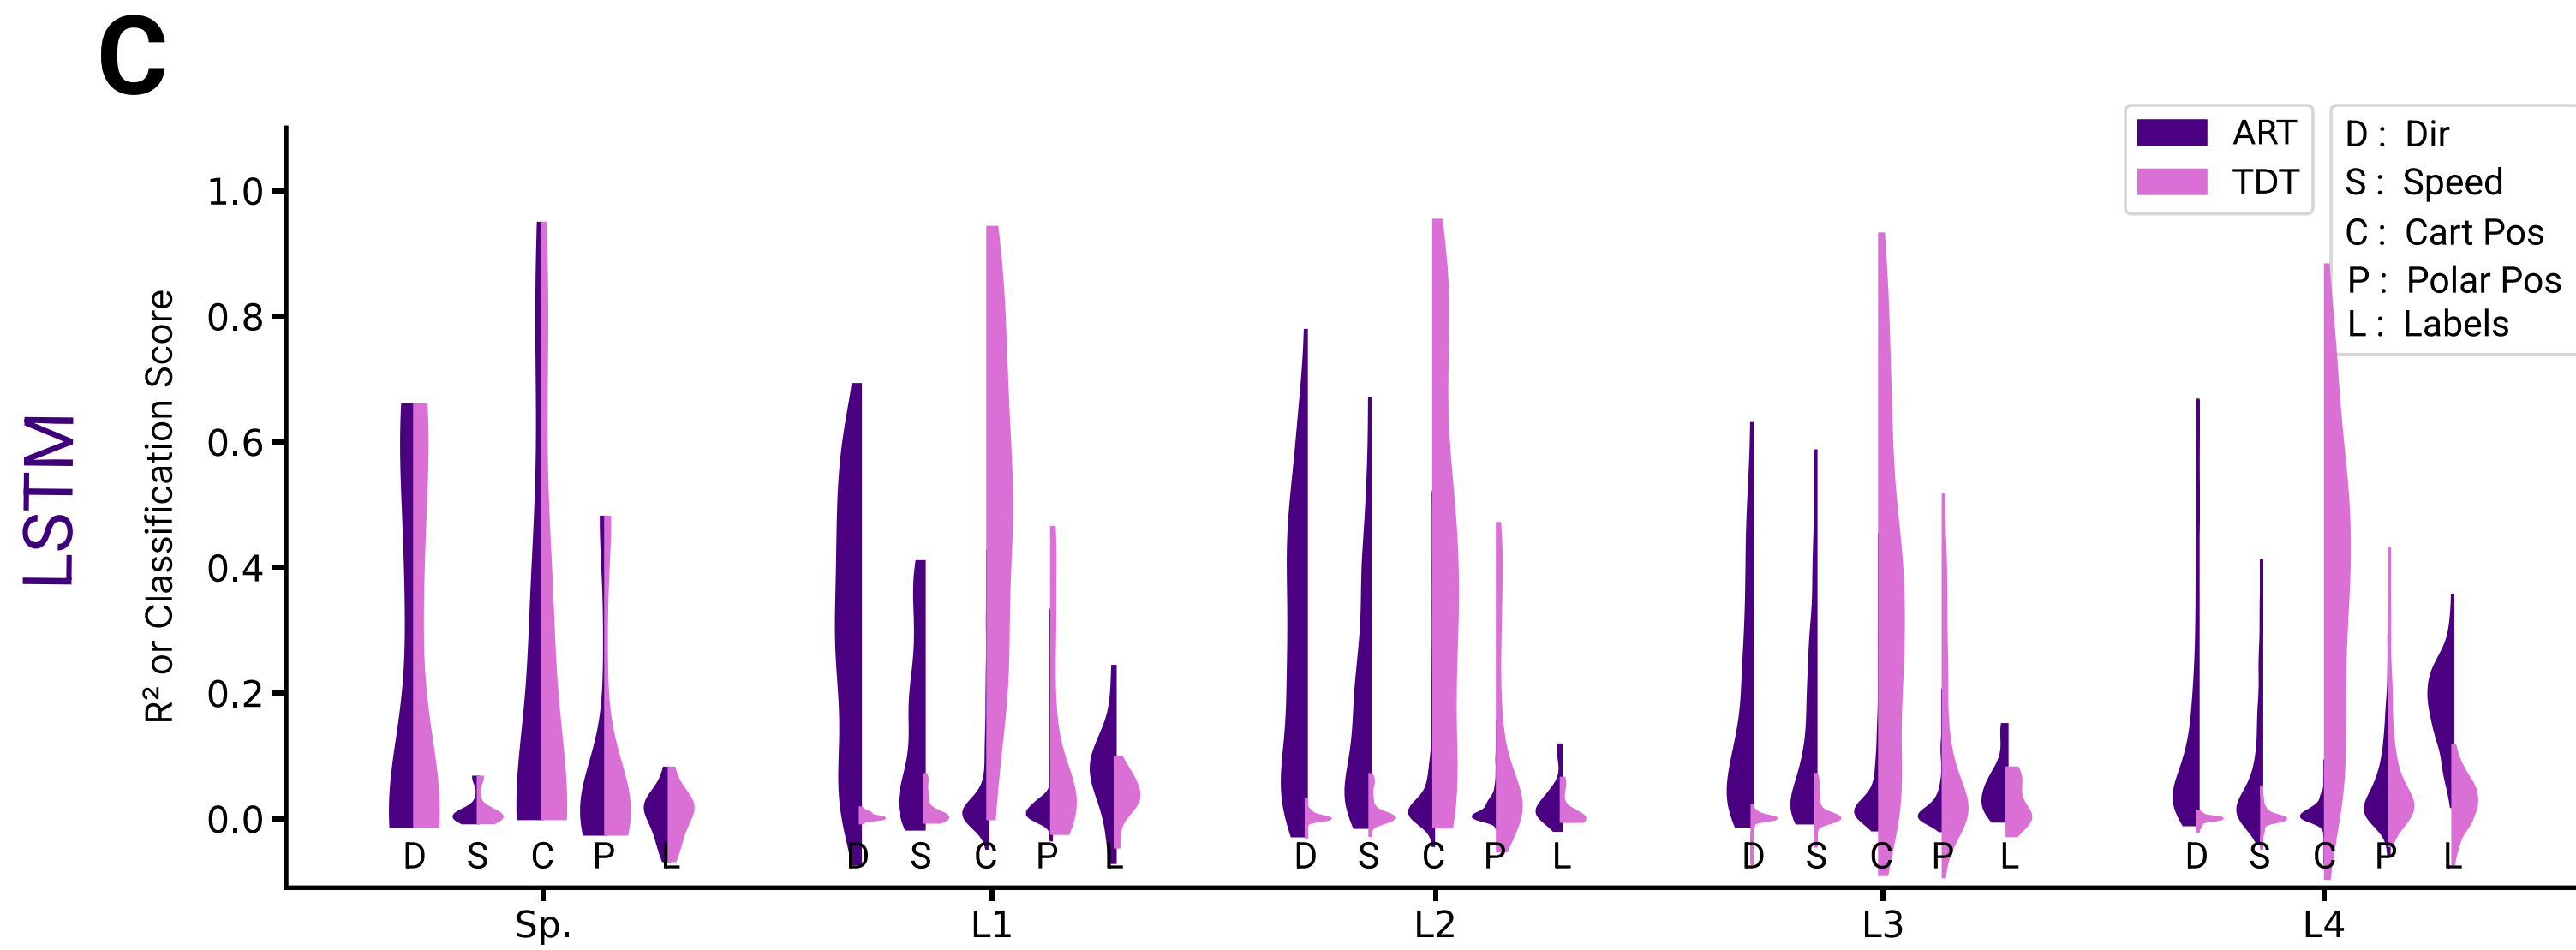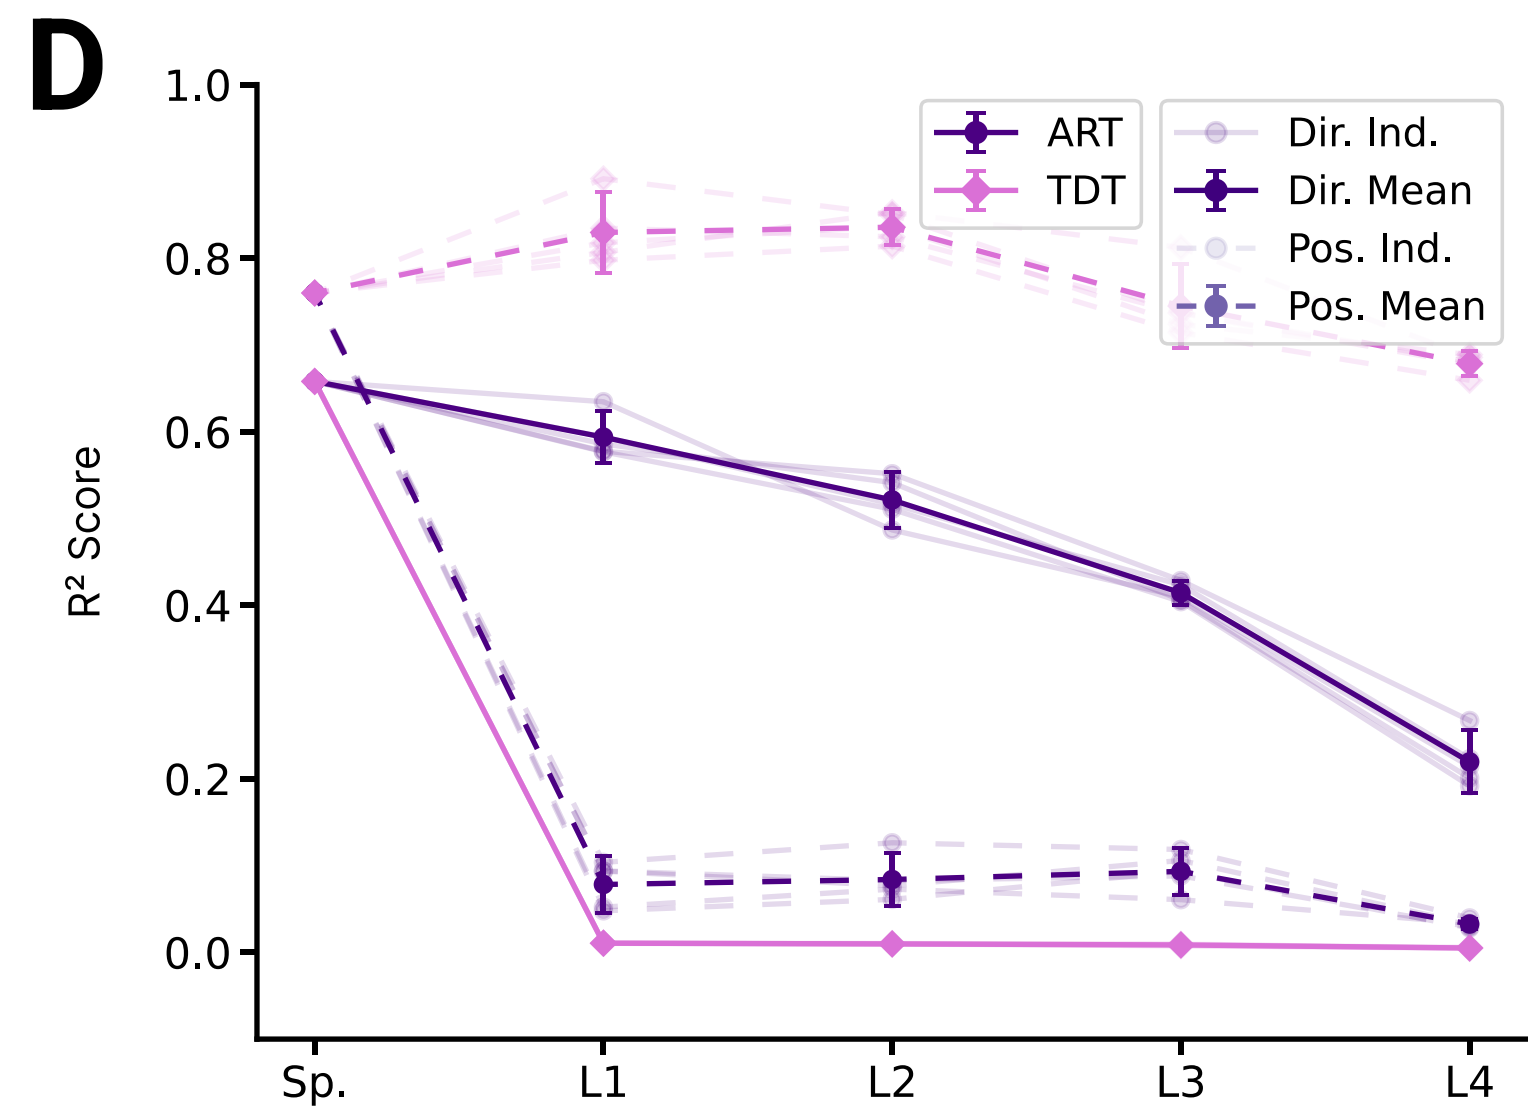

Supplement: supp [file elife_poa_e81499_Figure_5_figure_supplement_4.pdf › elife_poa_e81499_Figure_5_figure_supplement_4.pdf]

**A**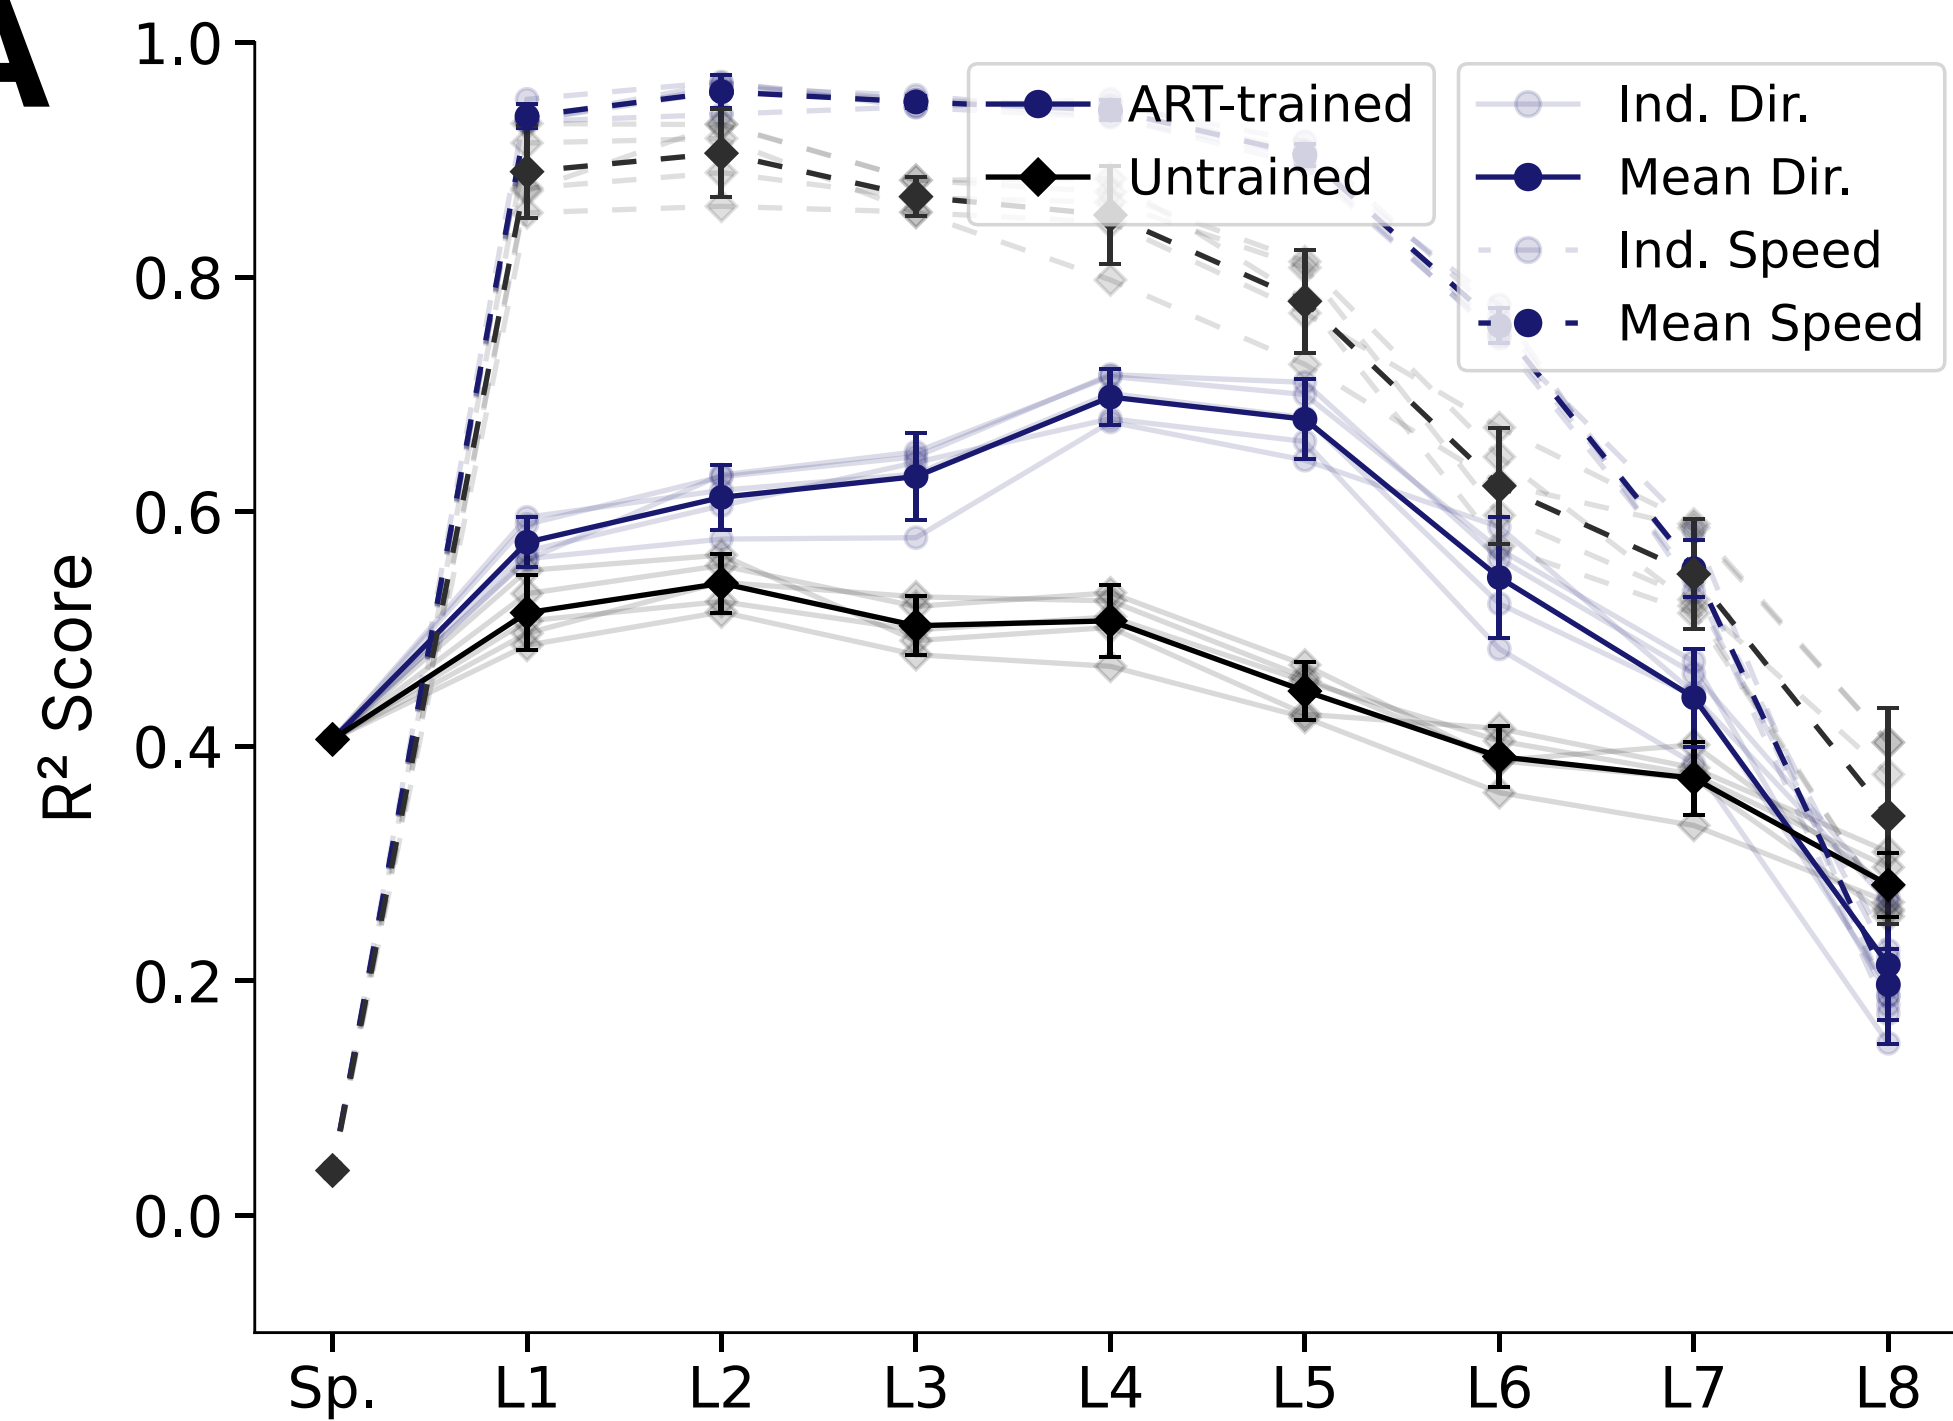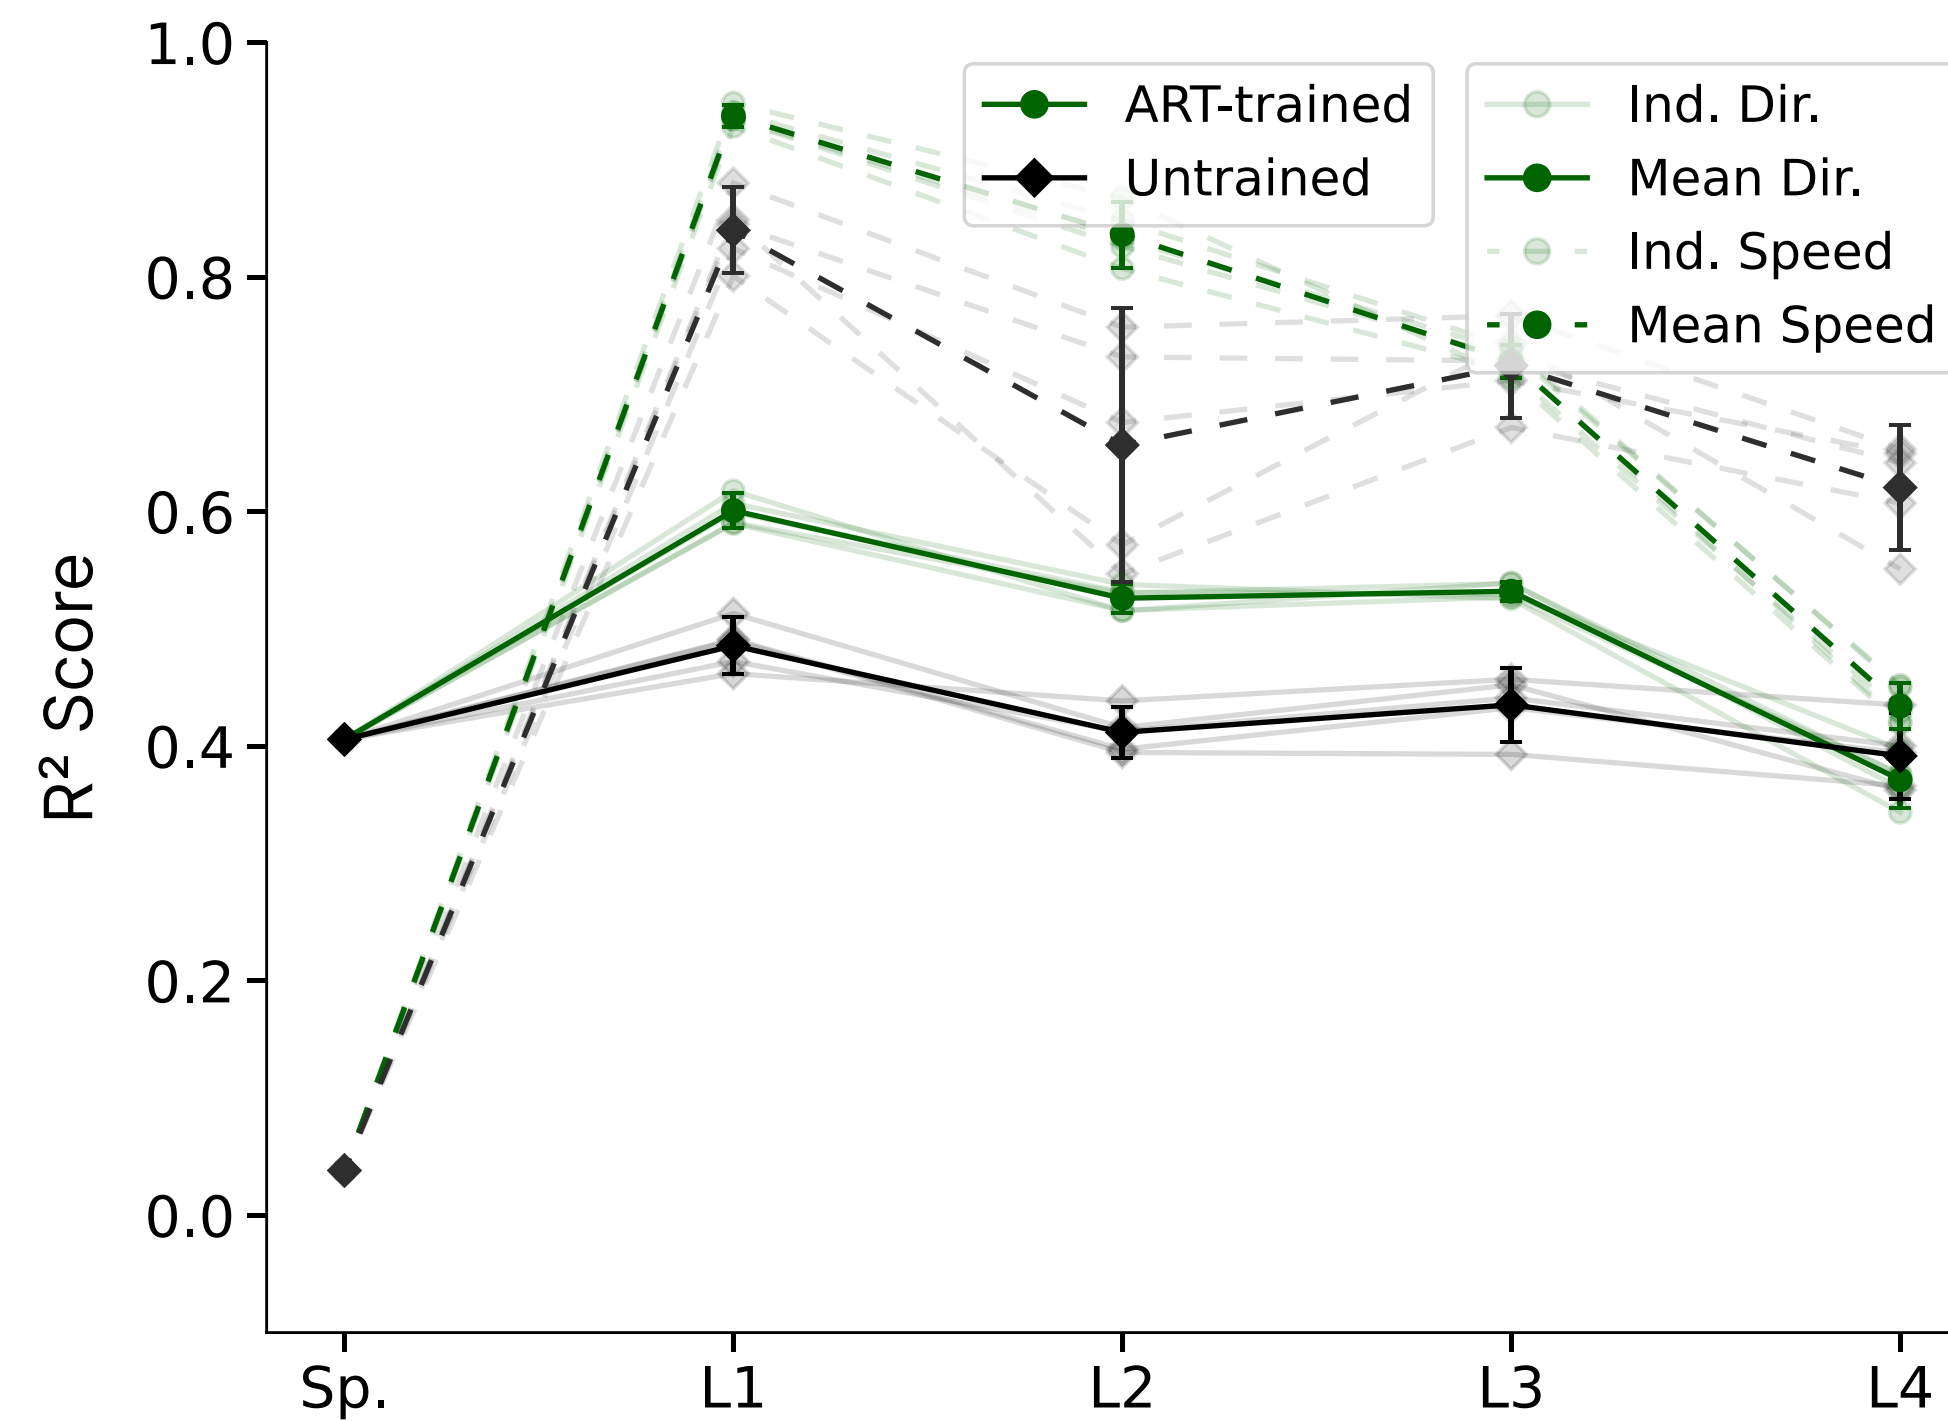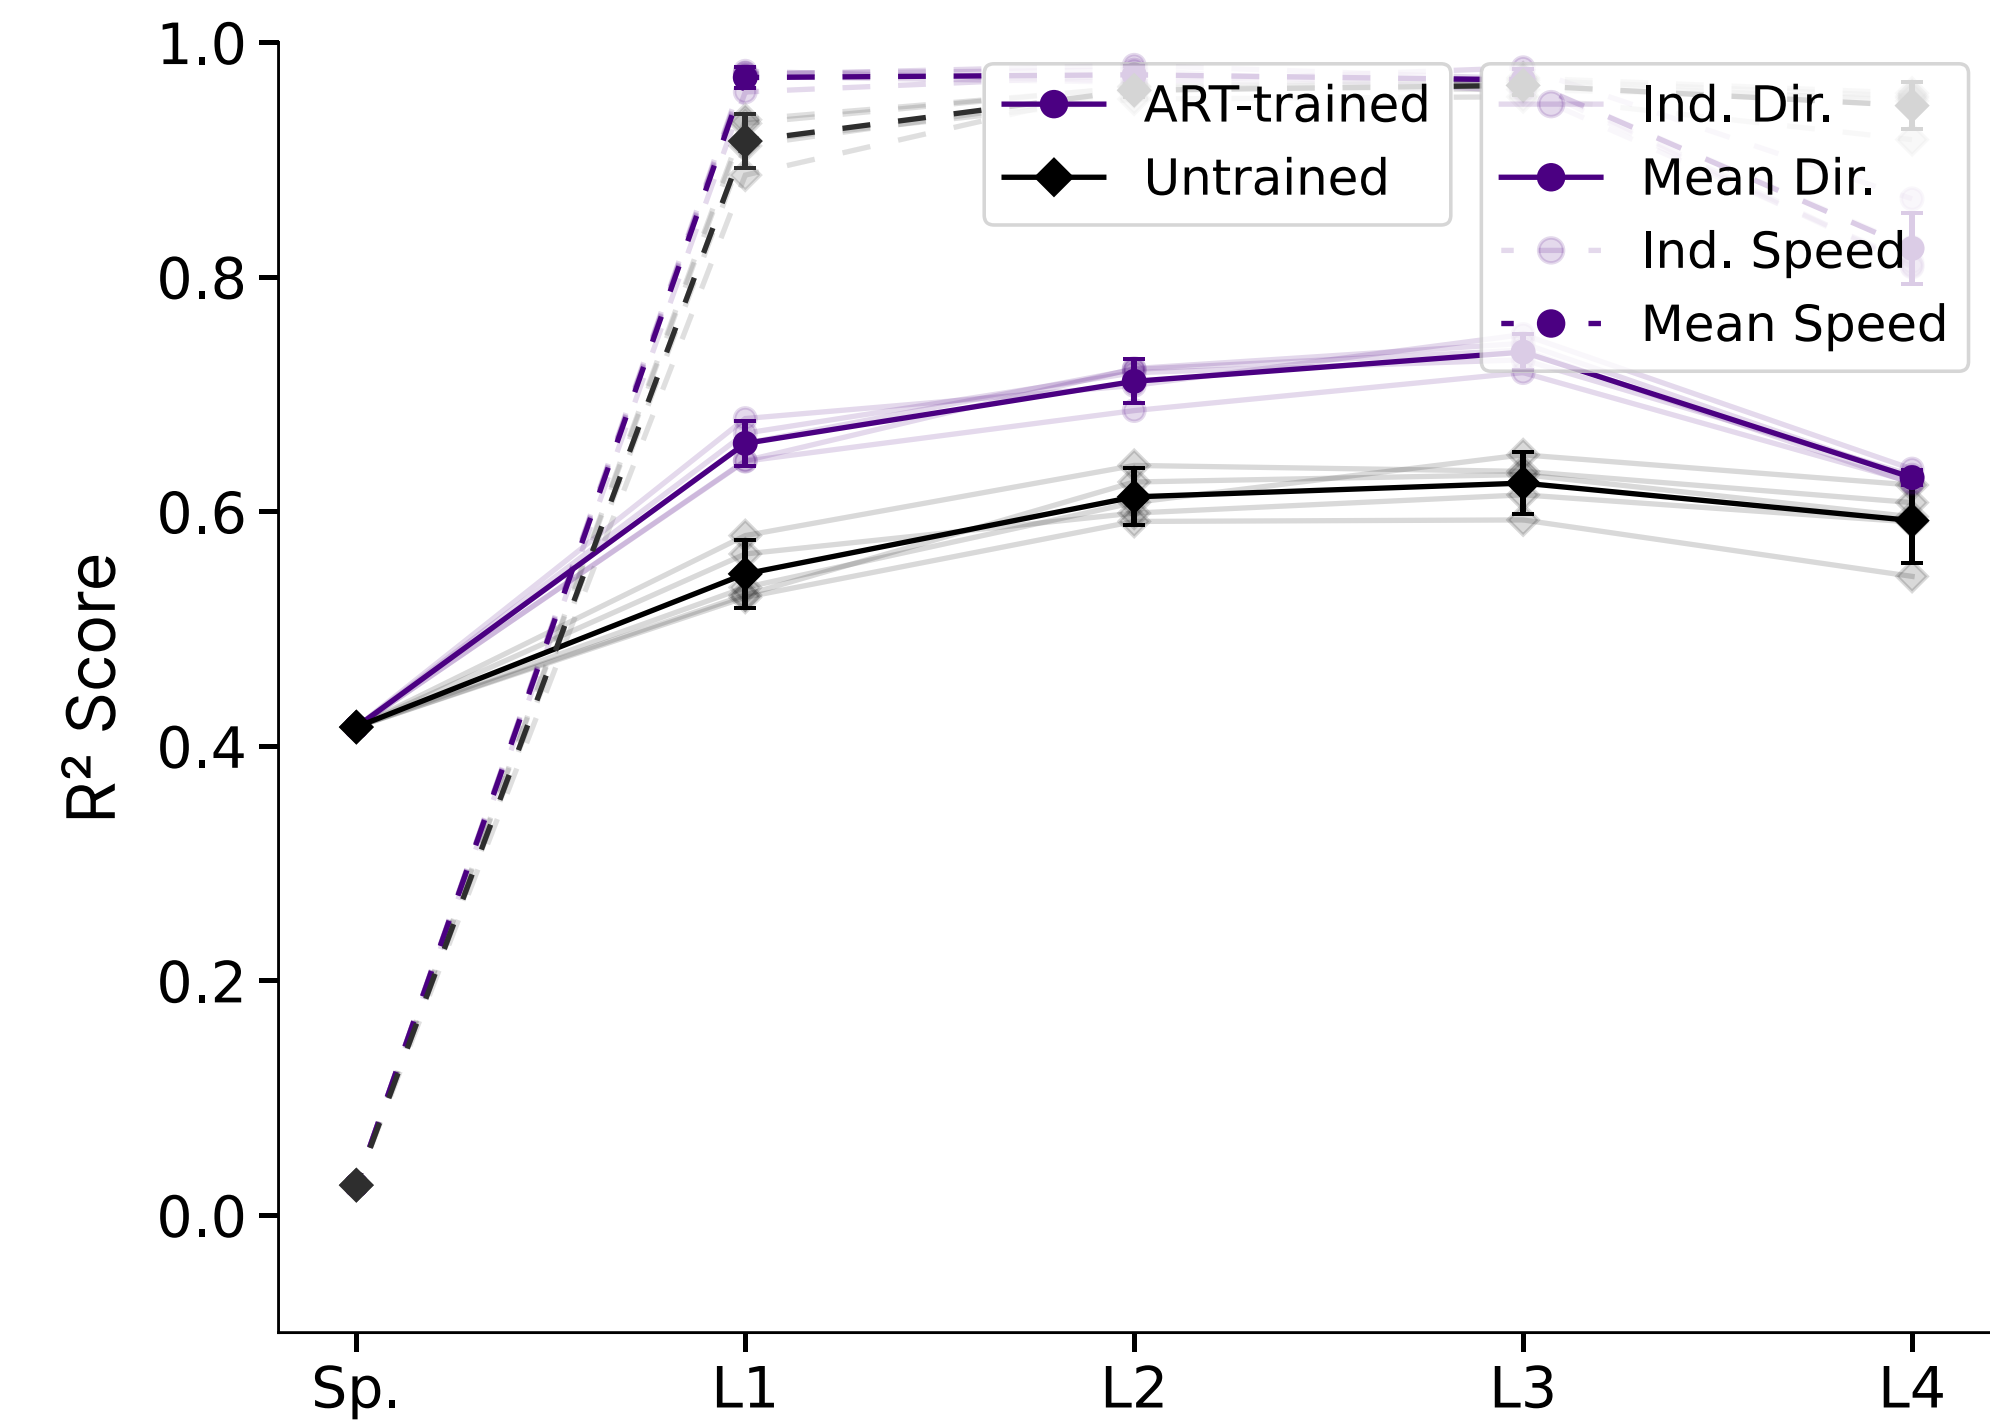**B**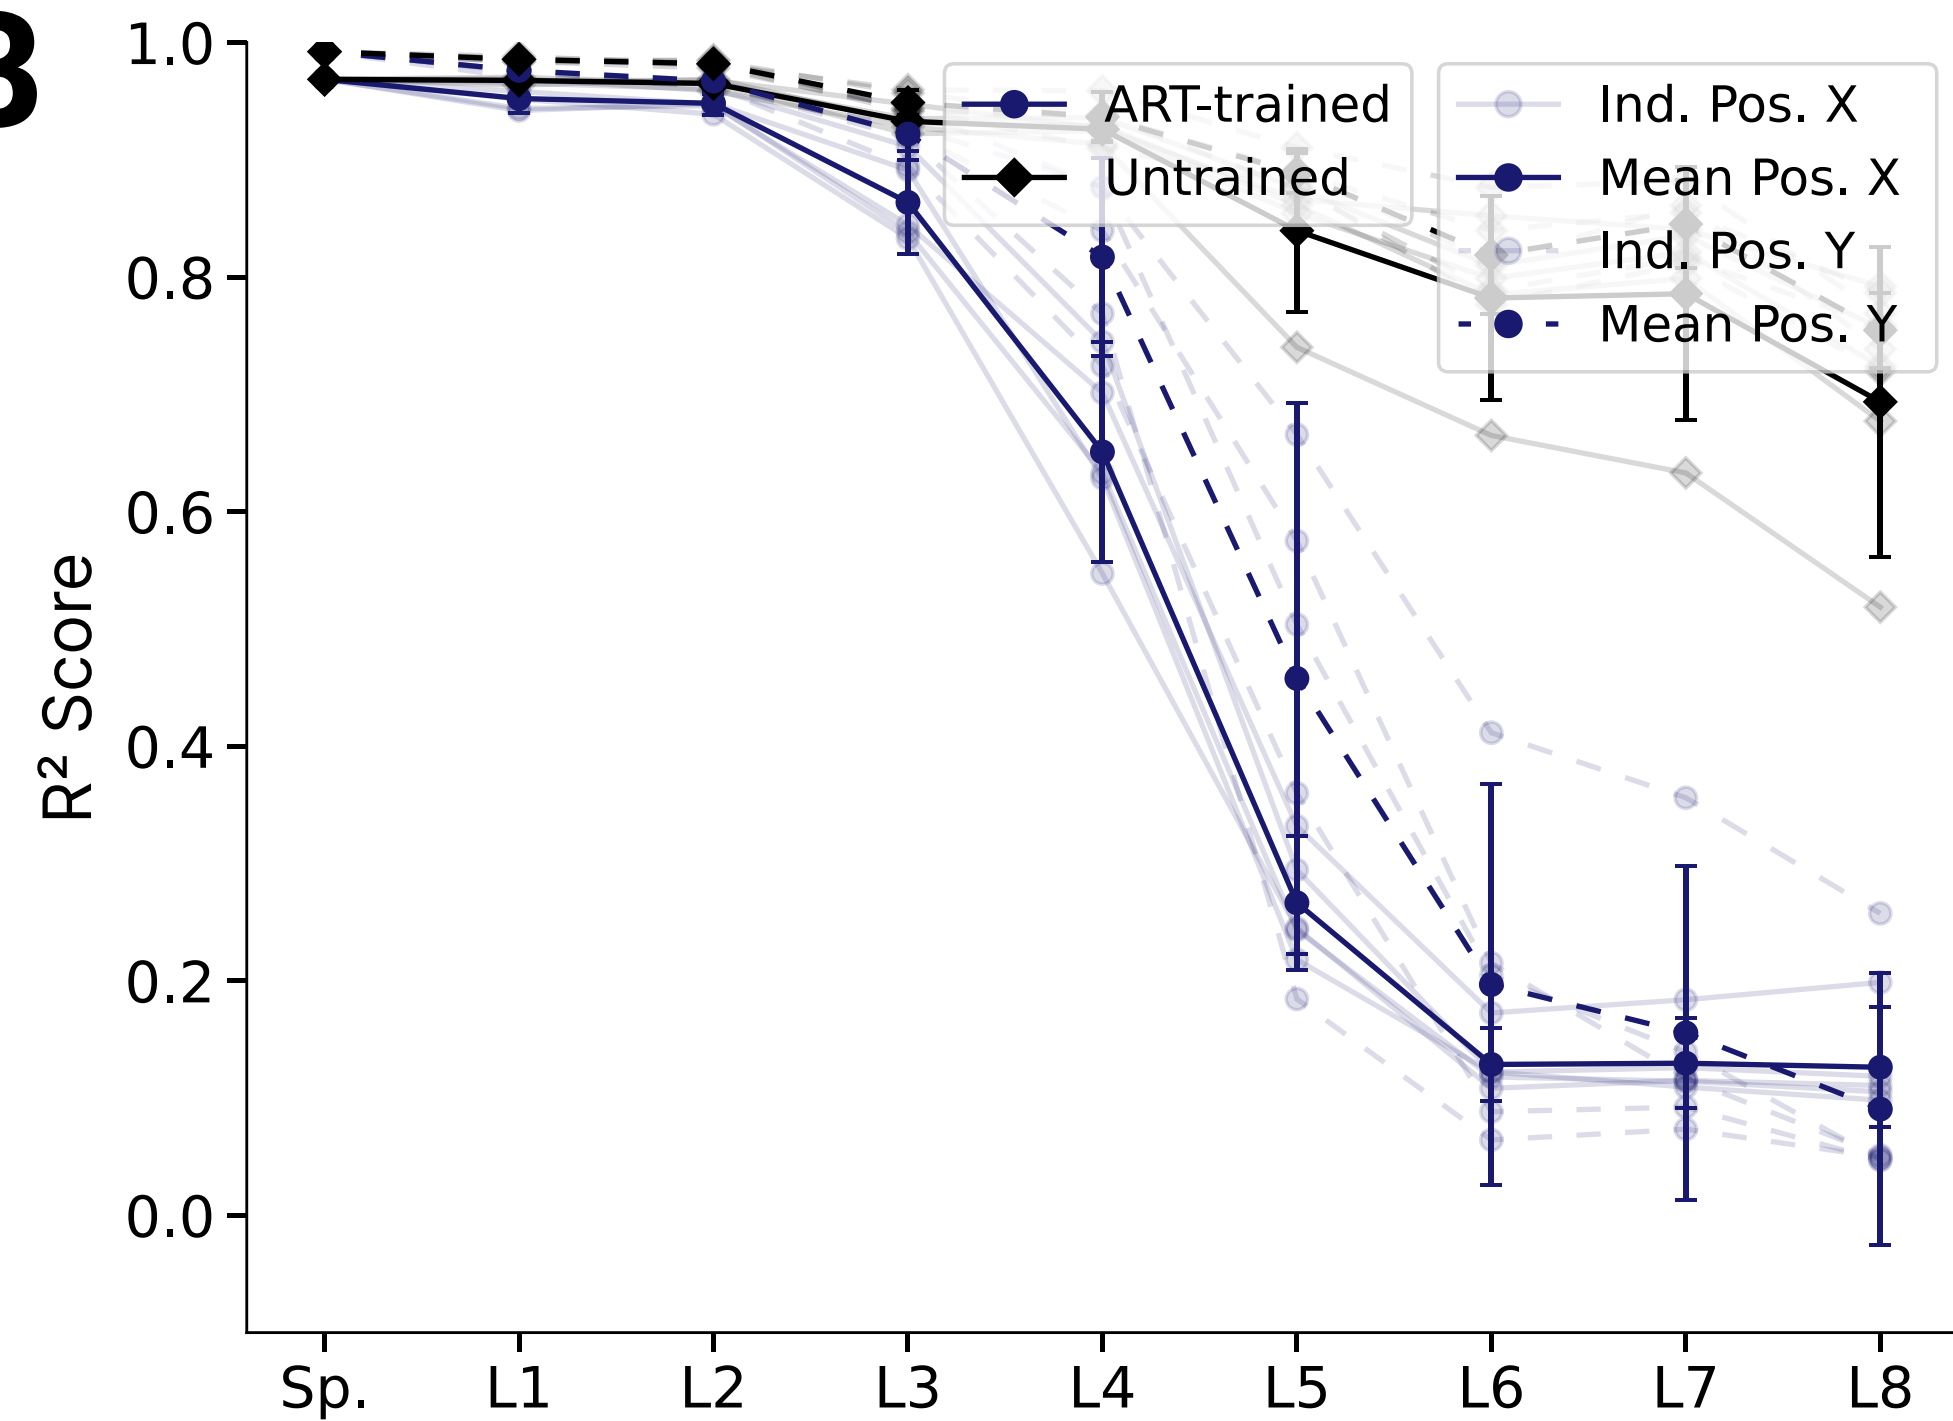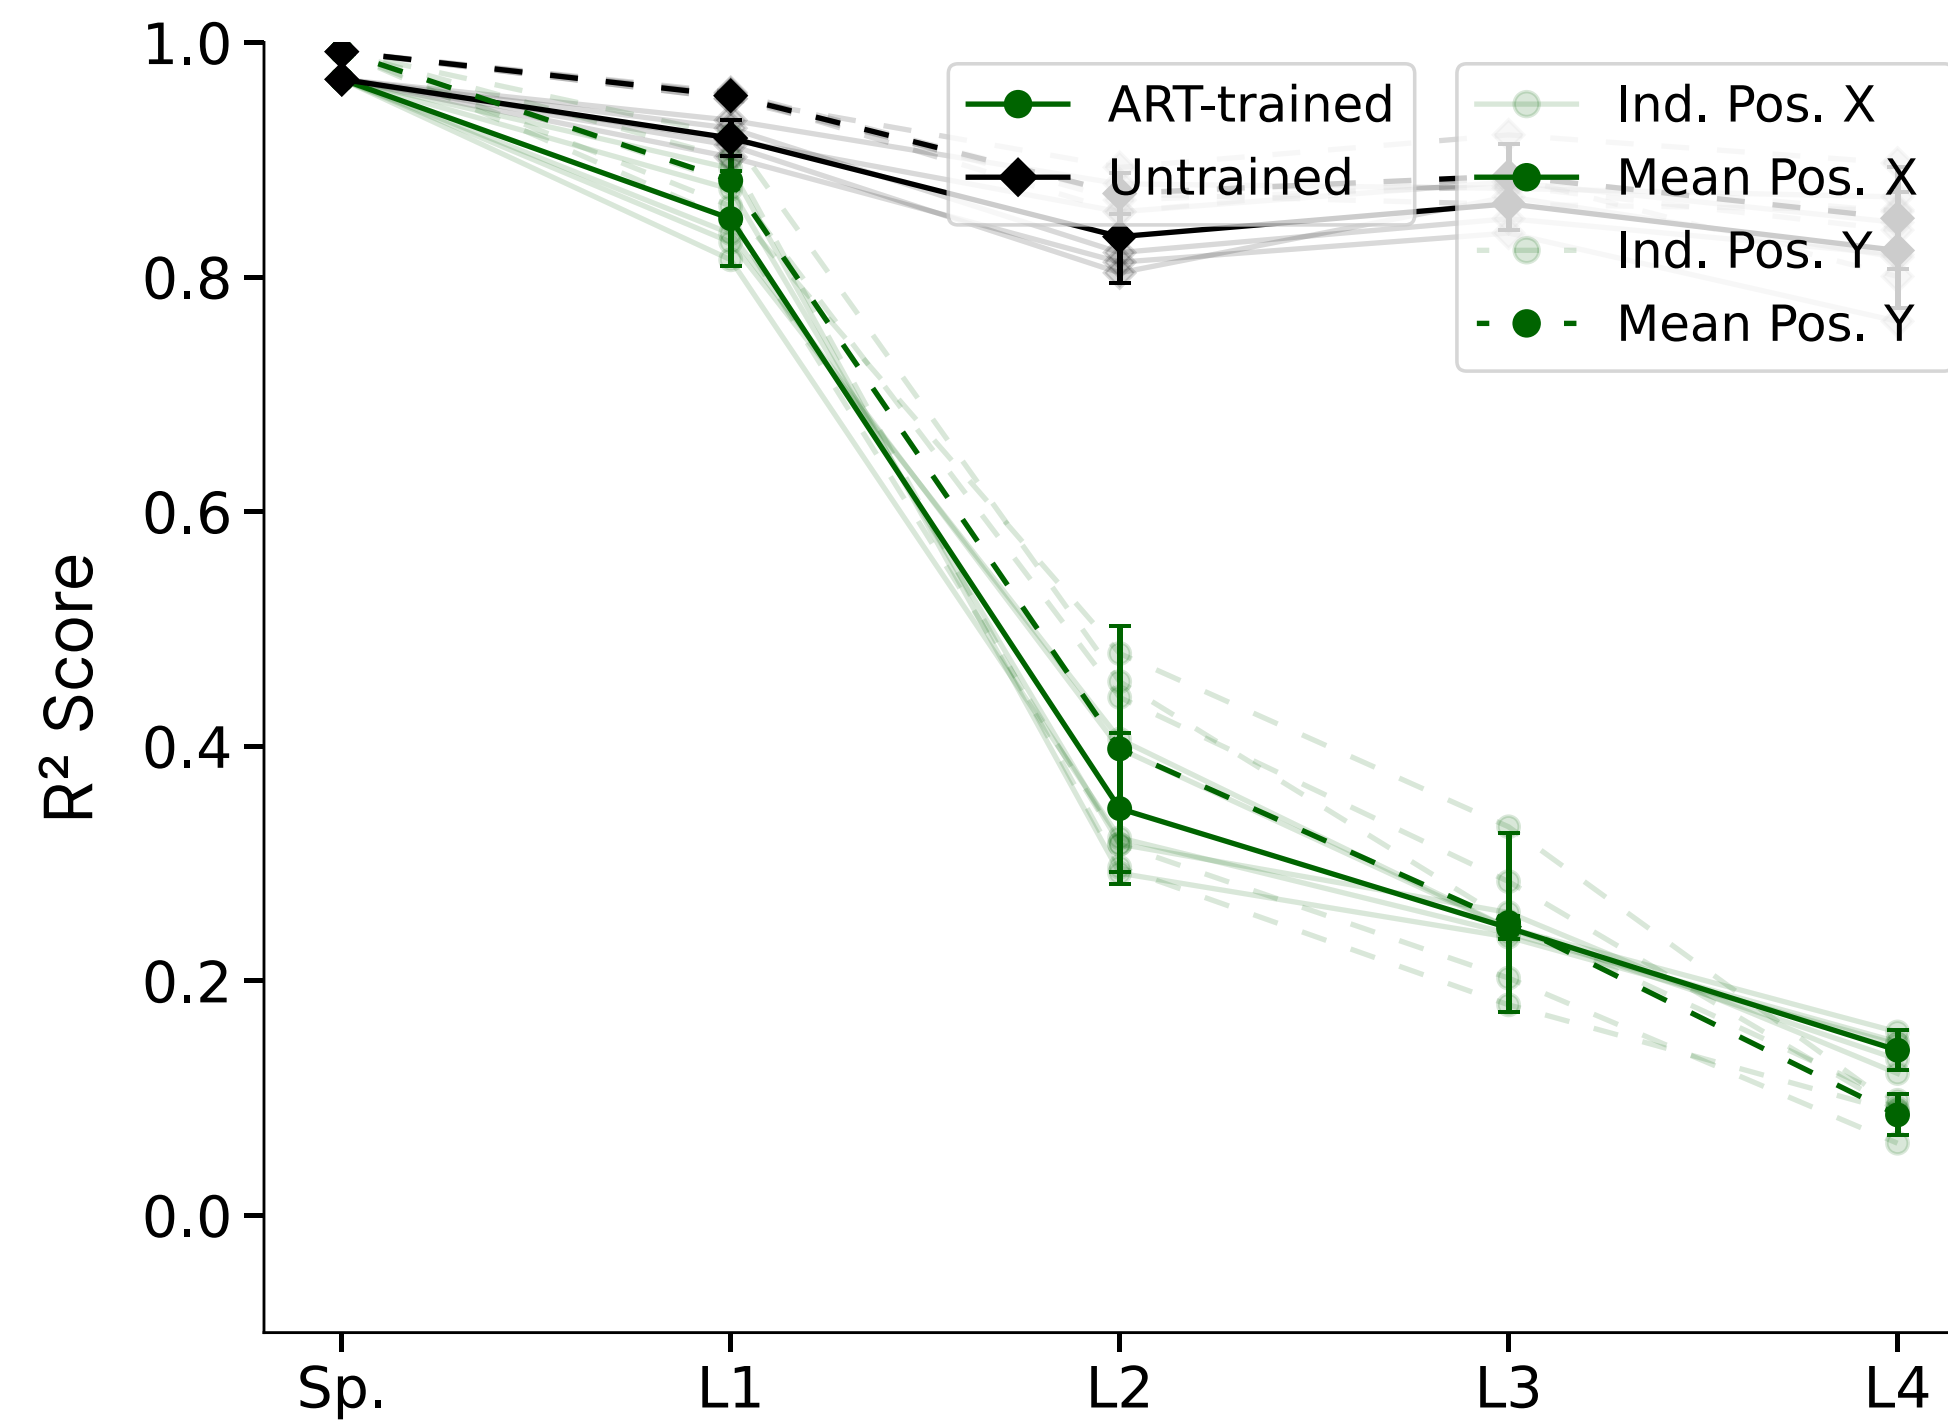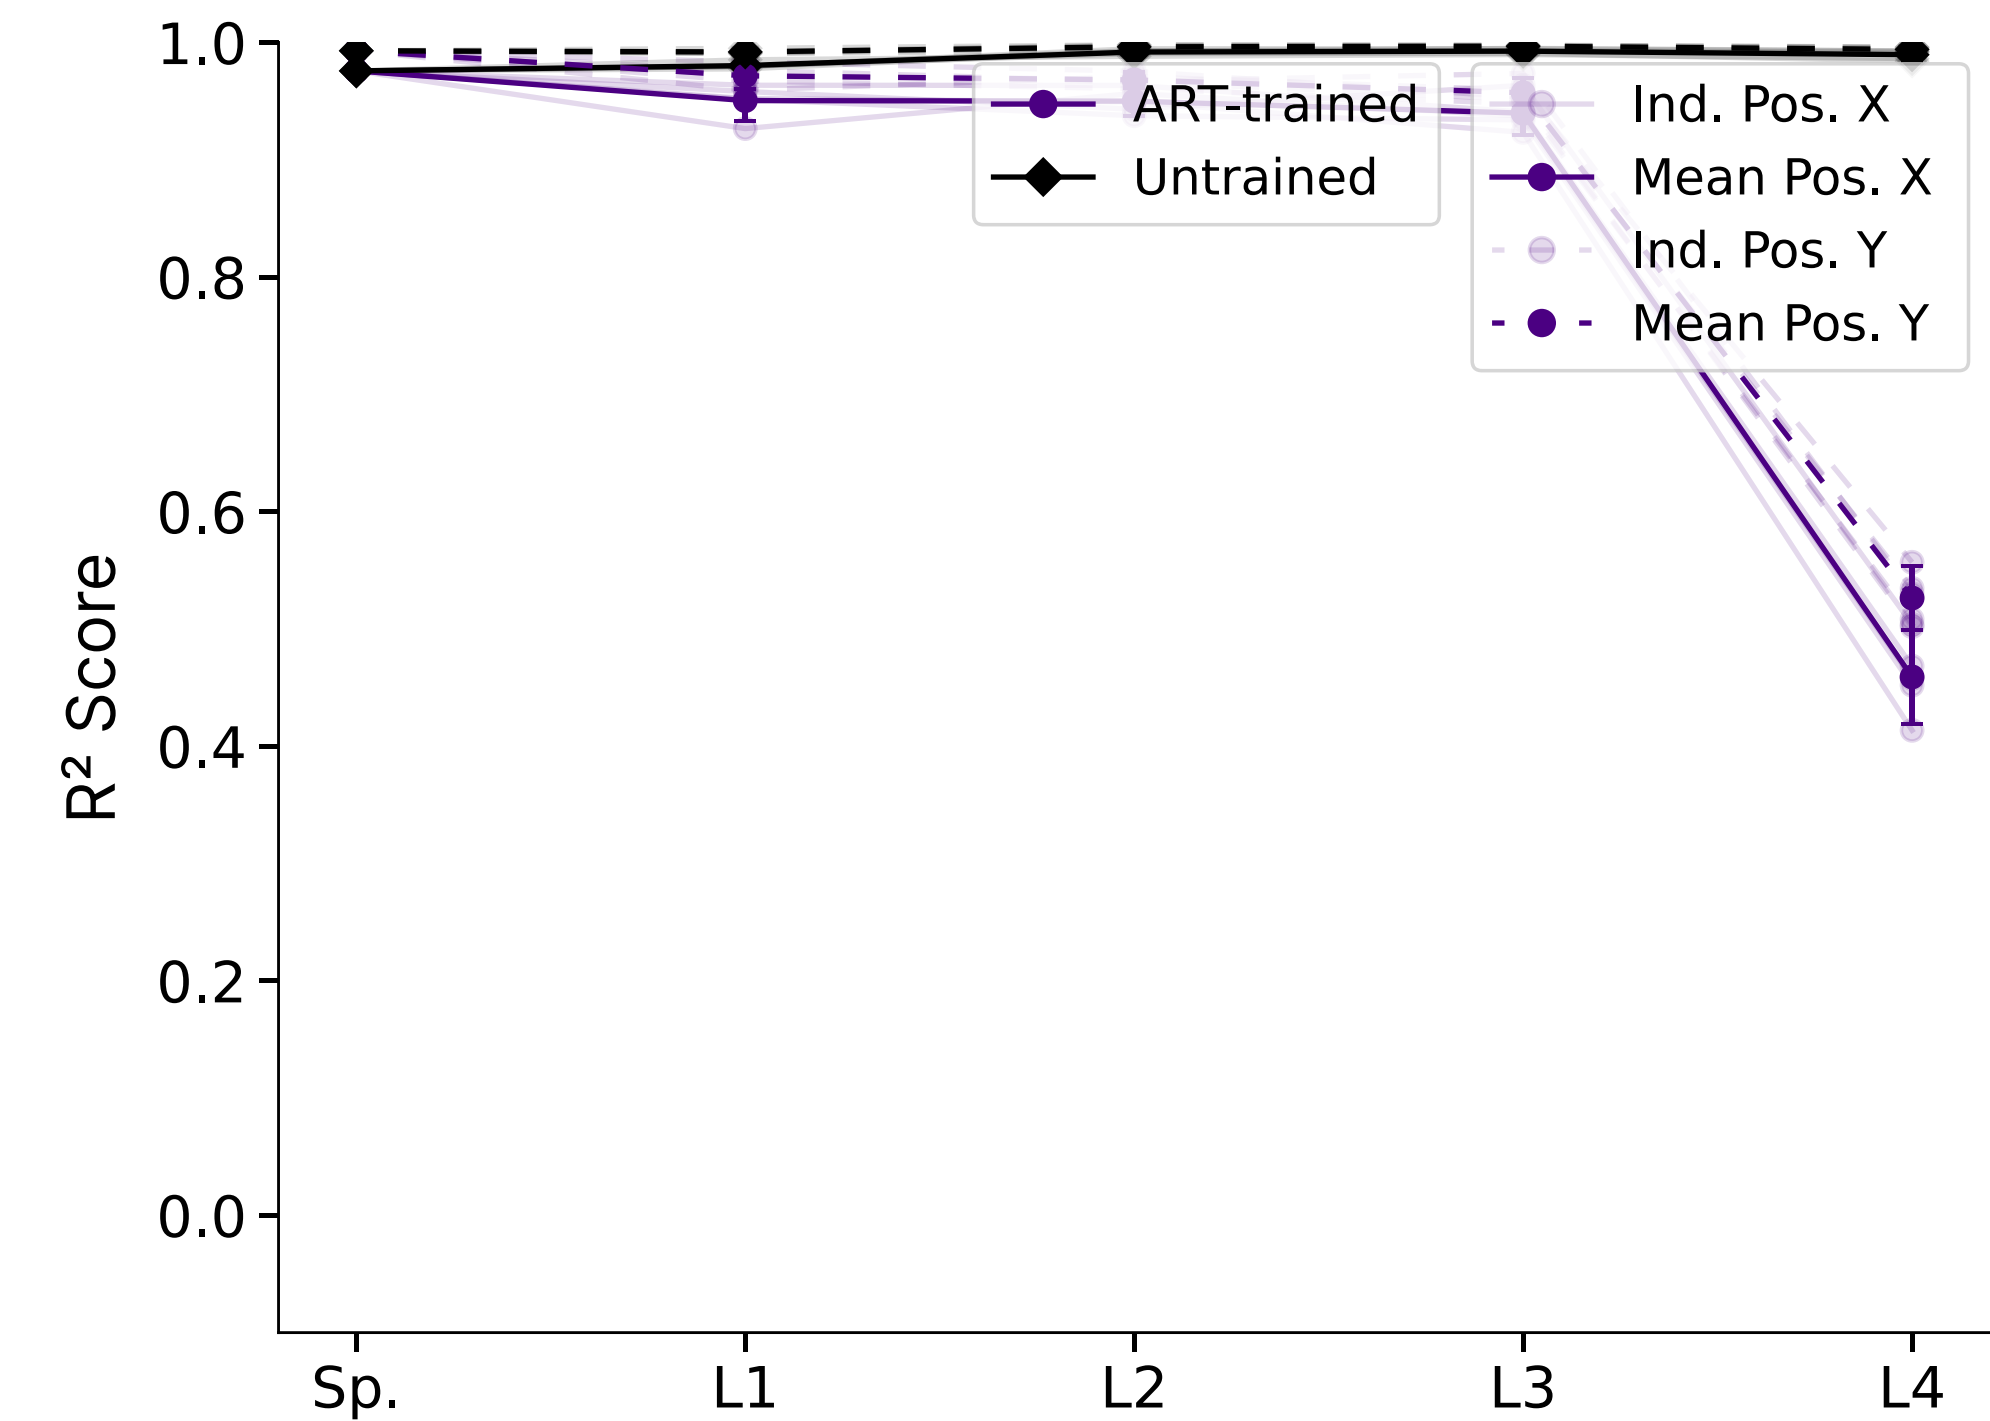

Supplement: supp [file elife_poa_e81499_Figure_6_figure_supplement_1.pdf › elife_poa_e81499_Figure_6_figure_supplement_1.pdf]

**A**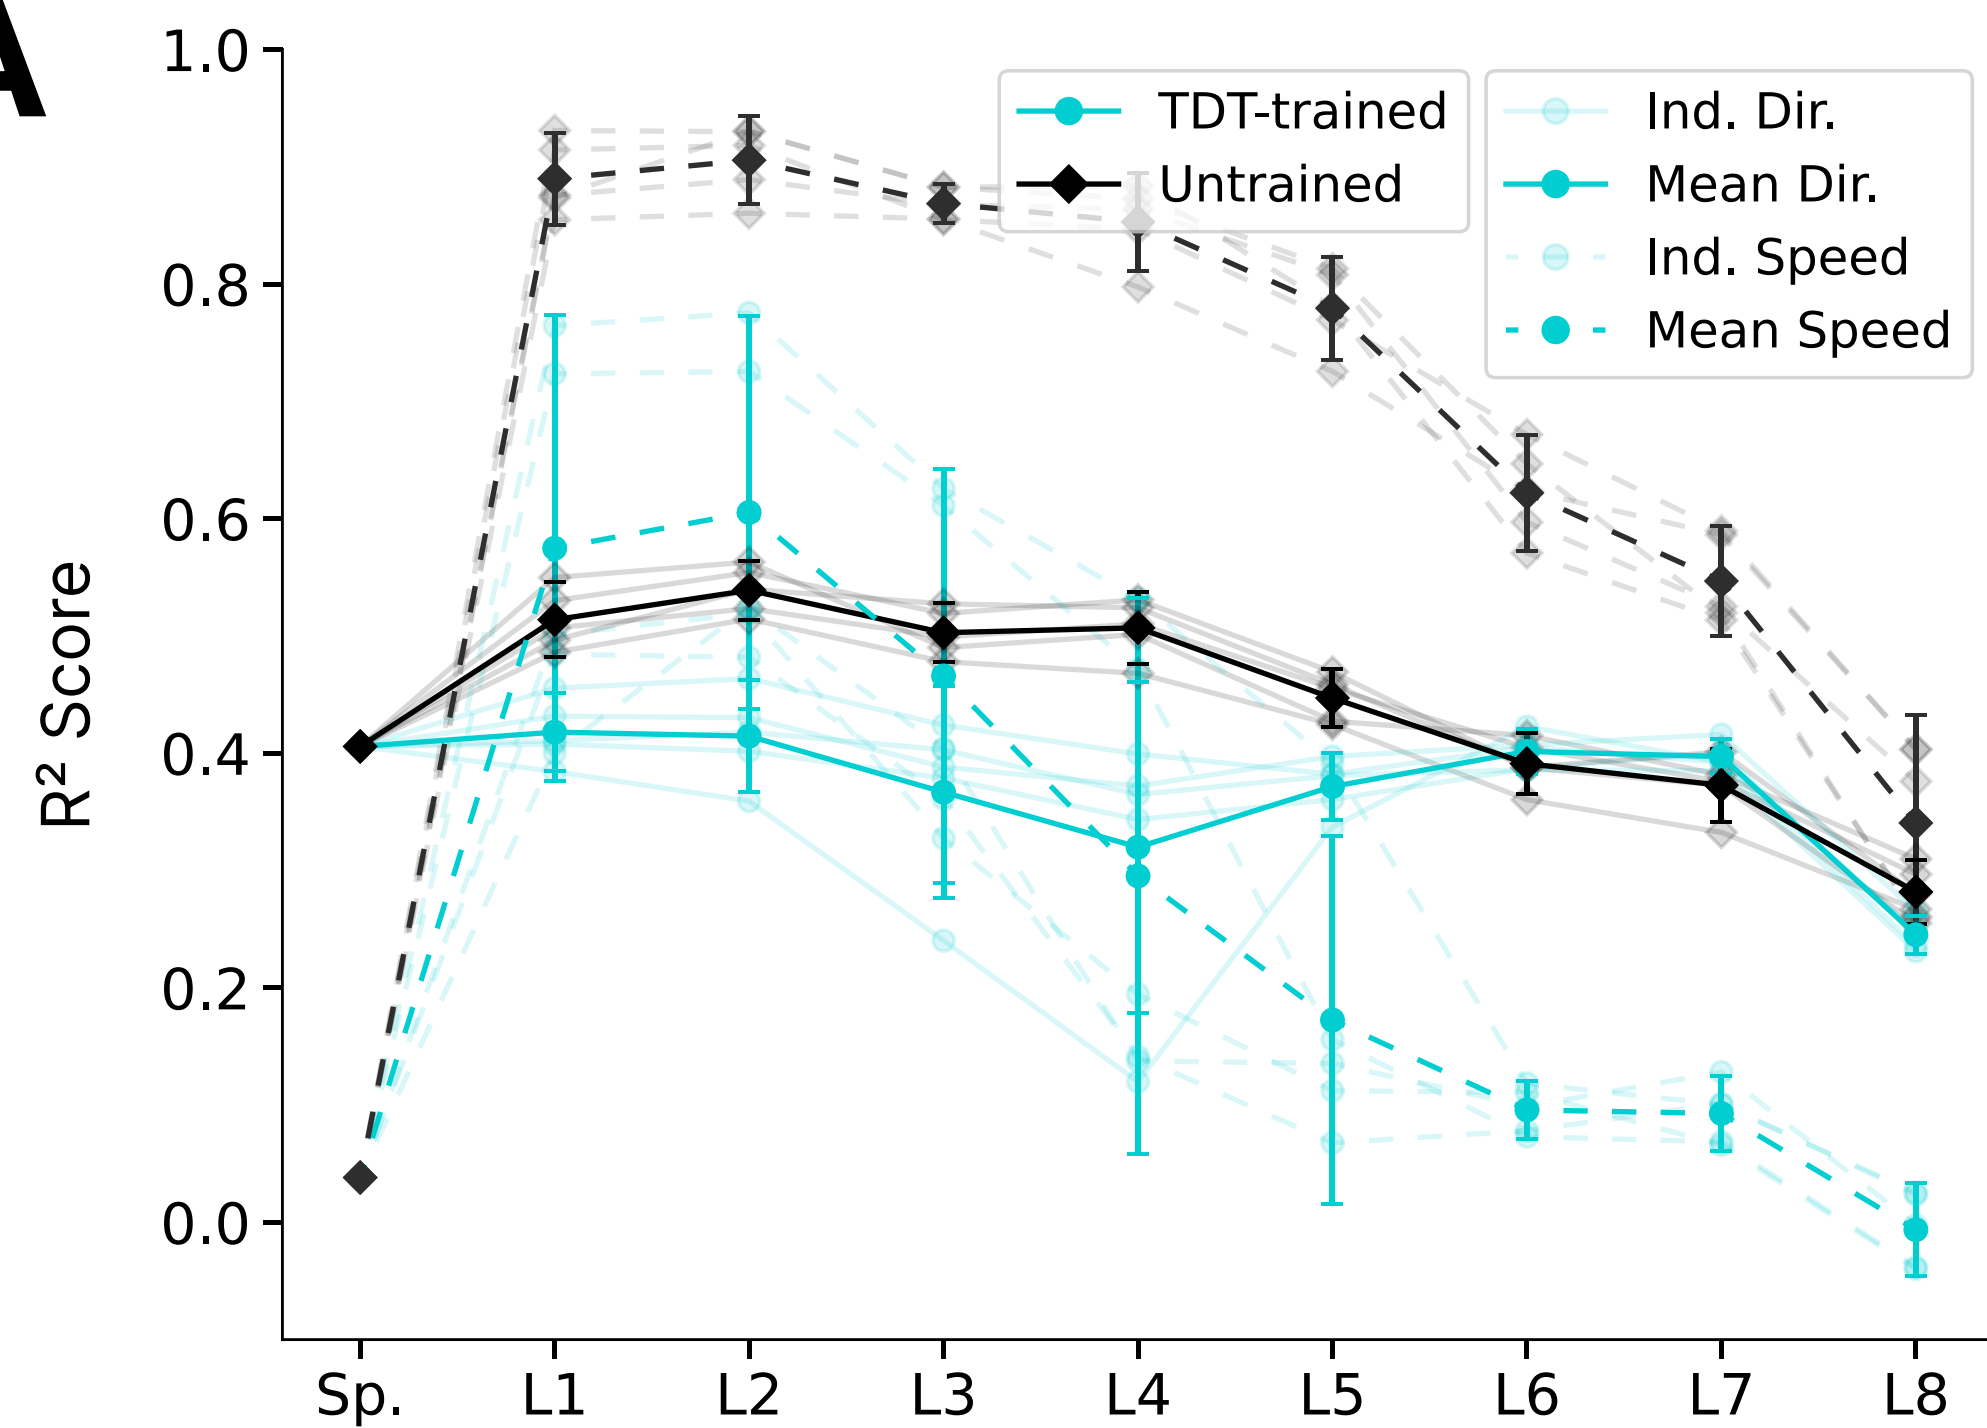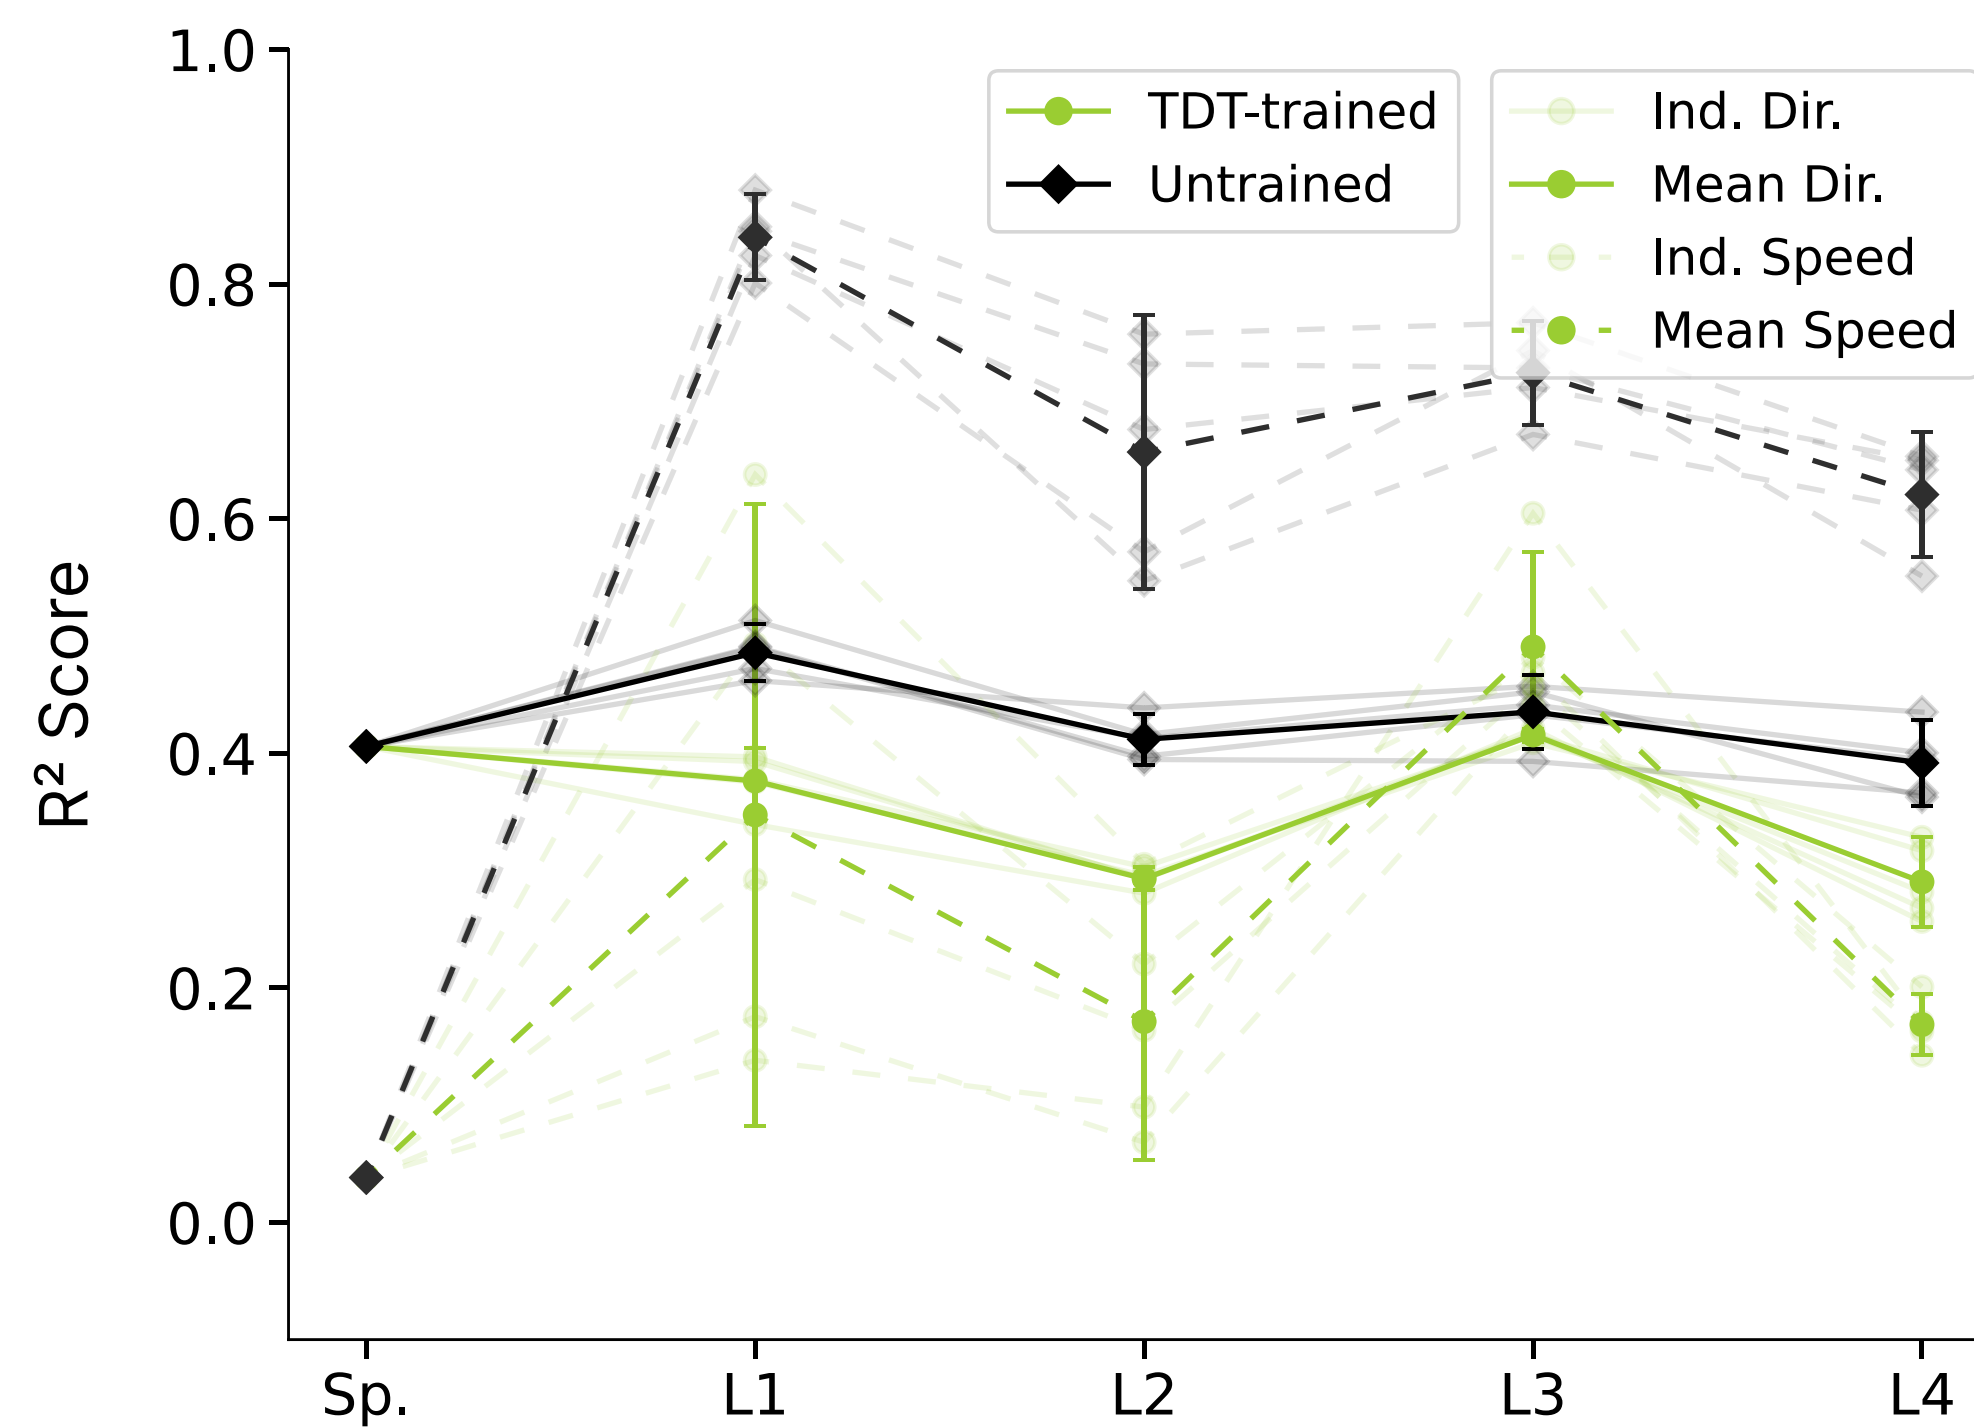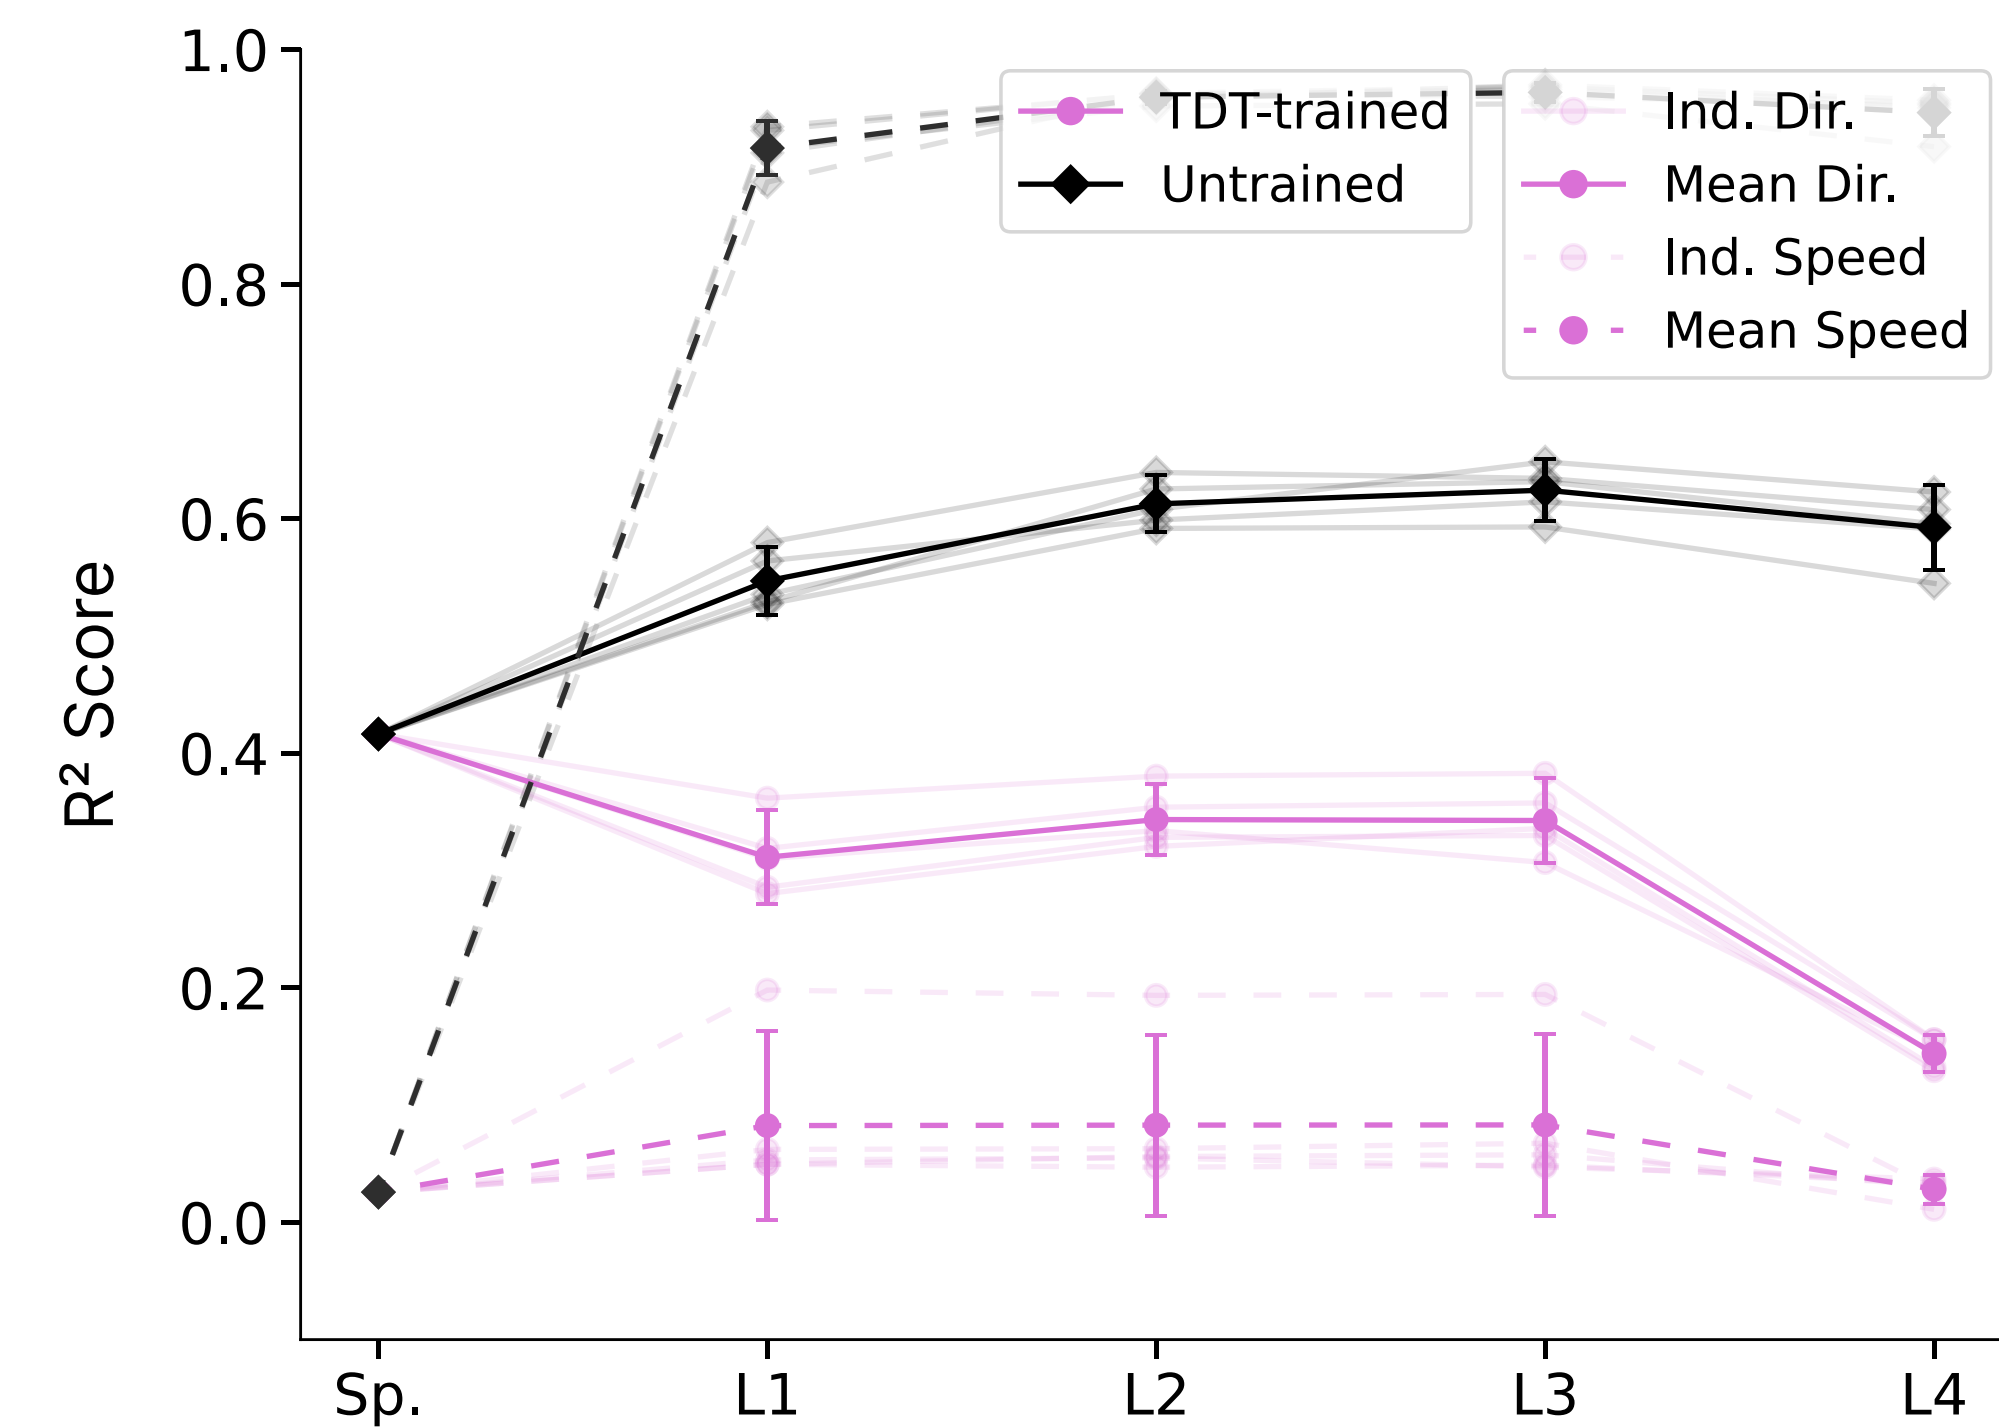**B**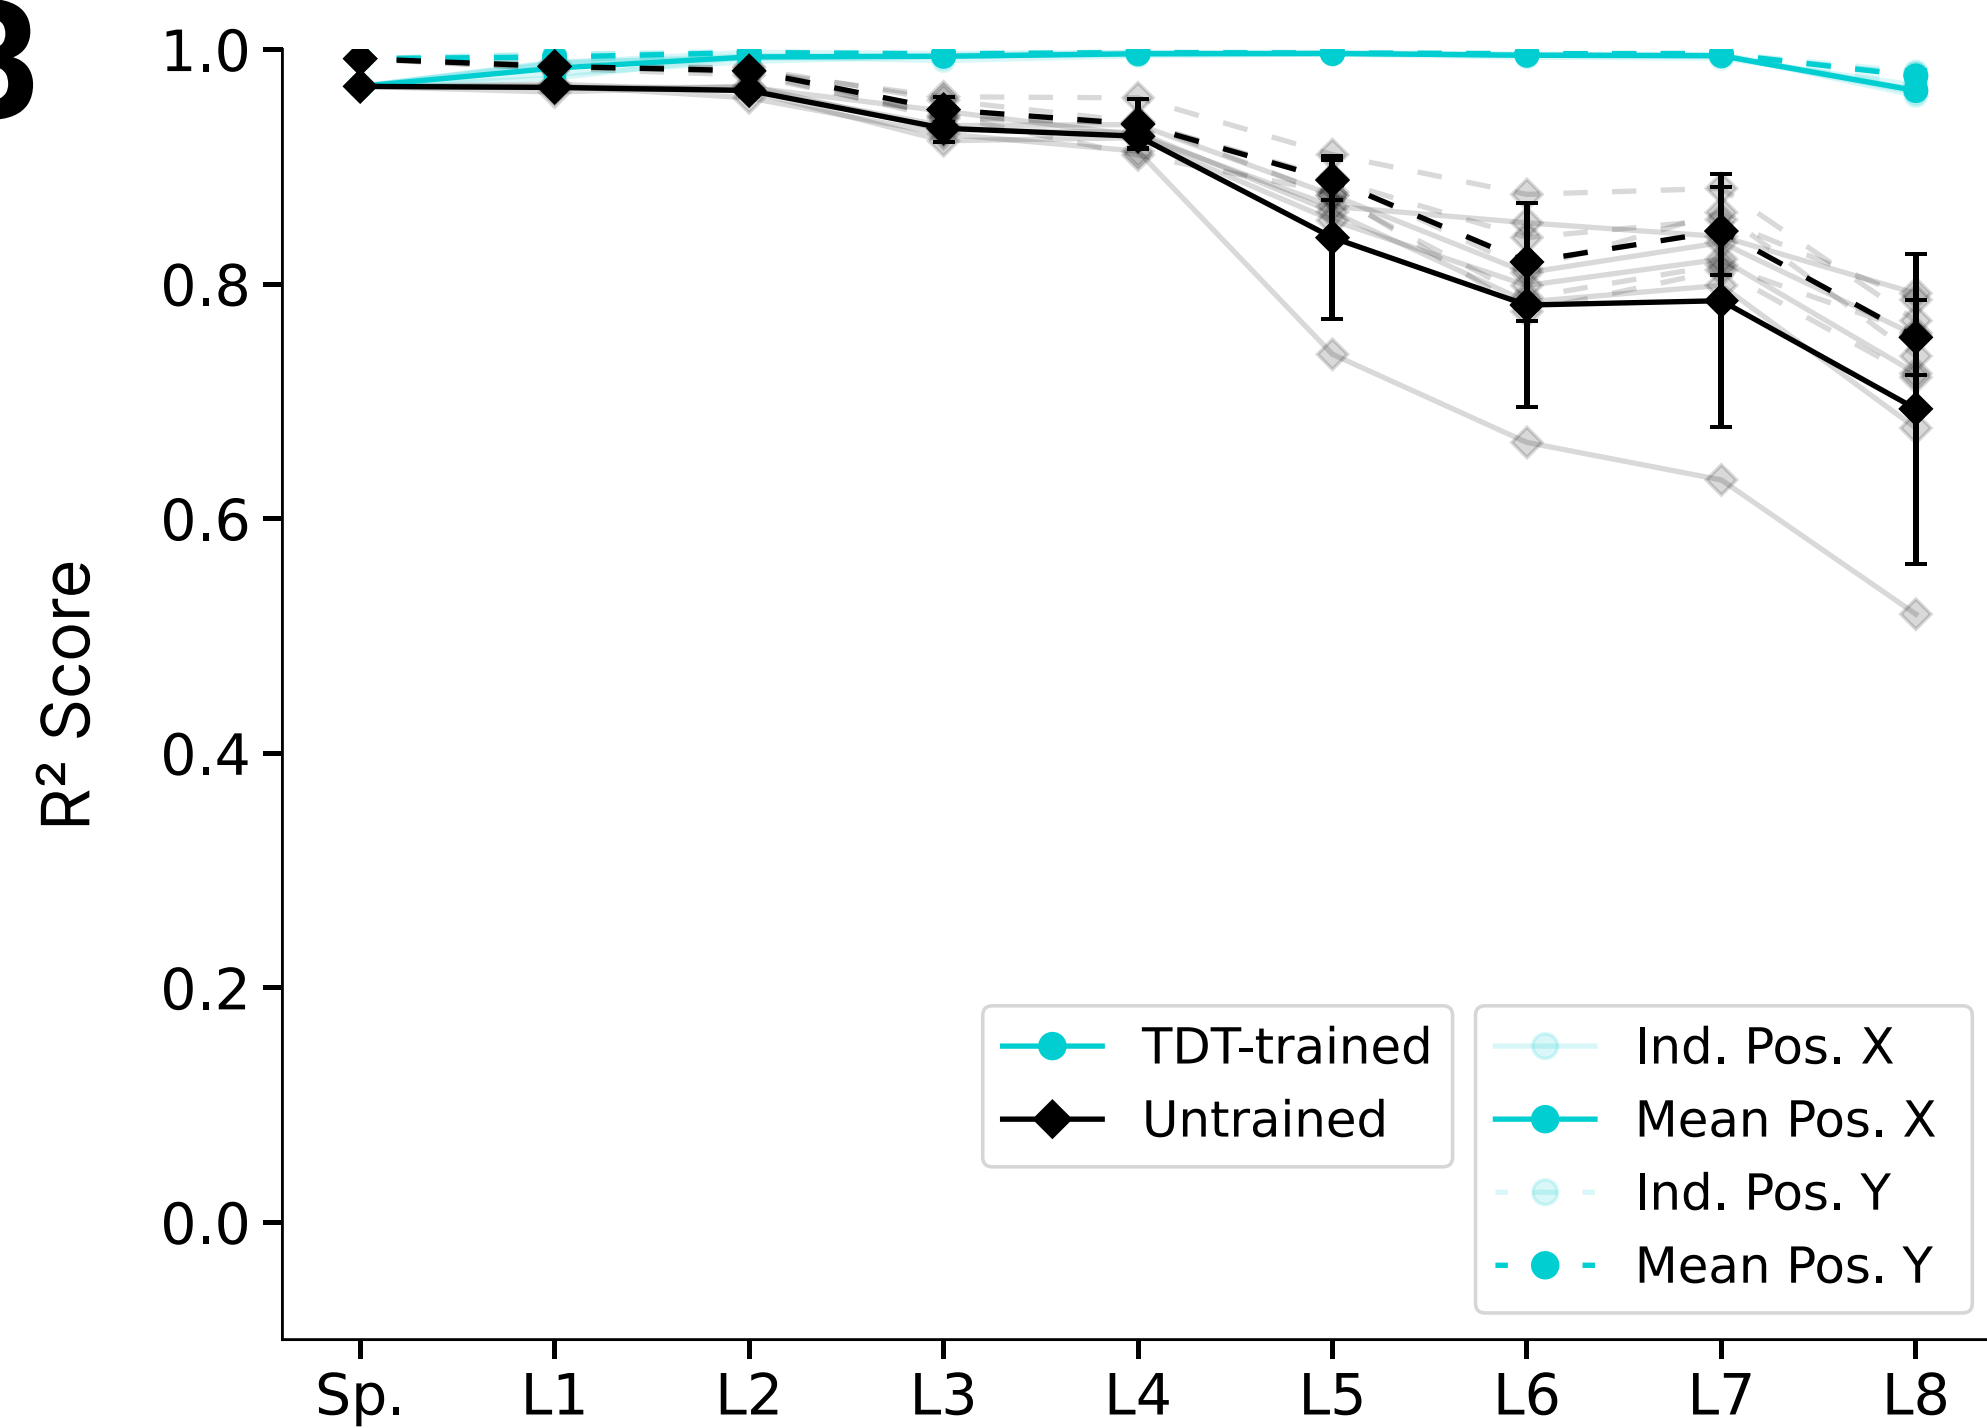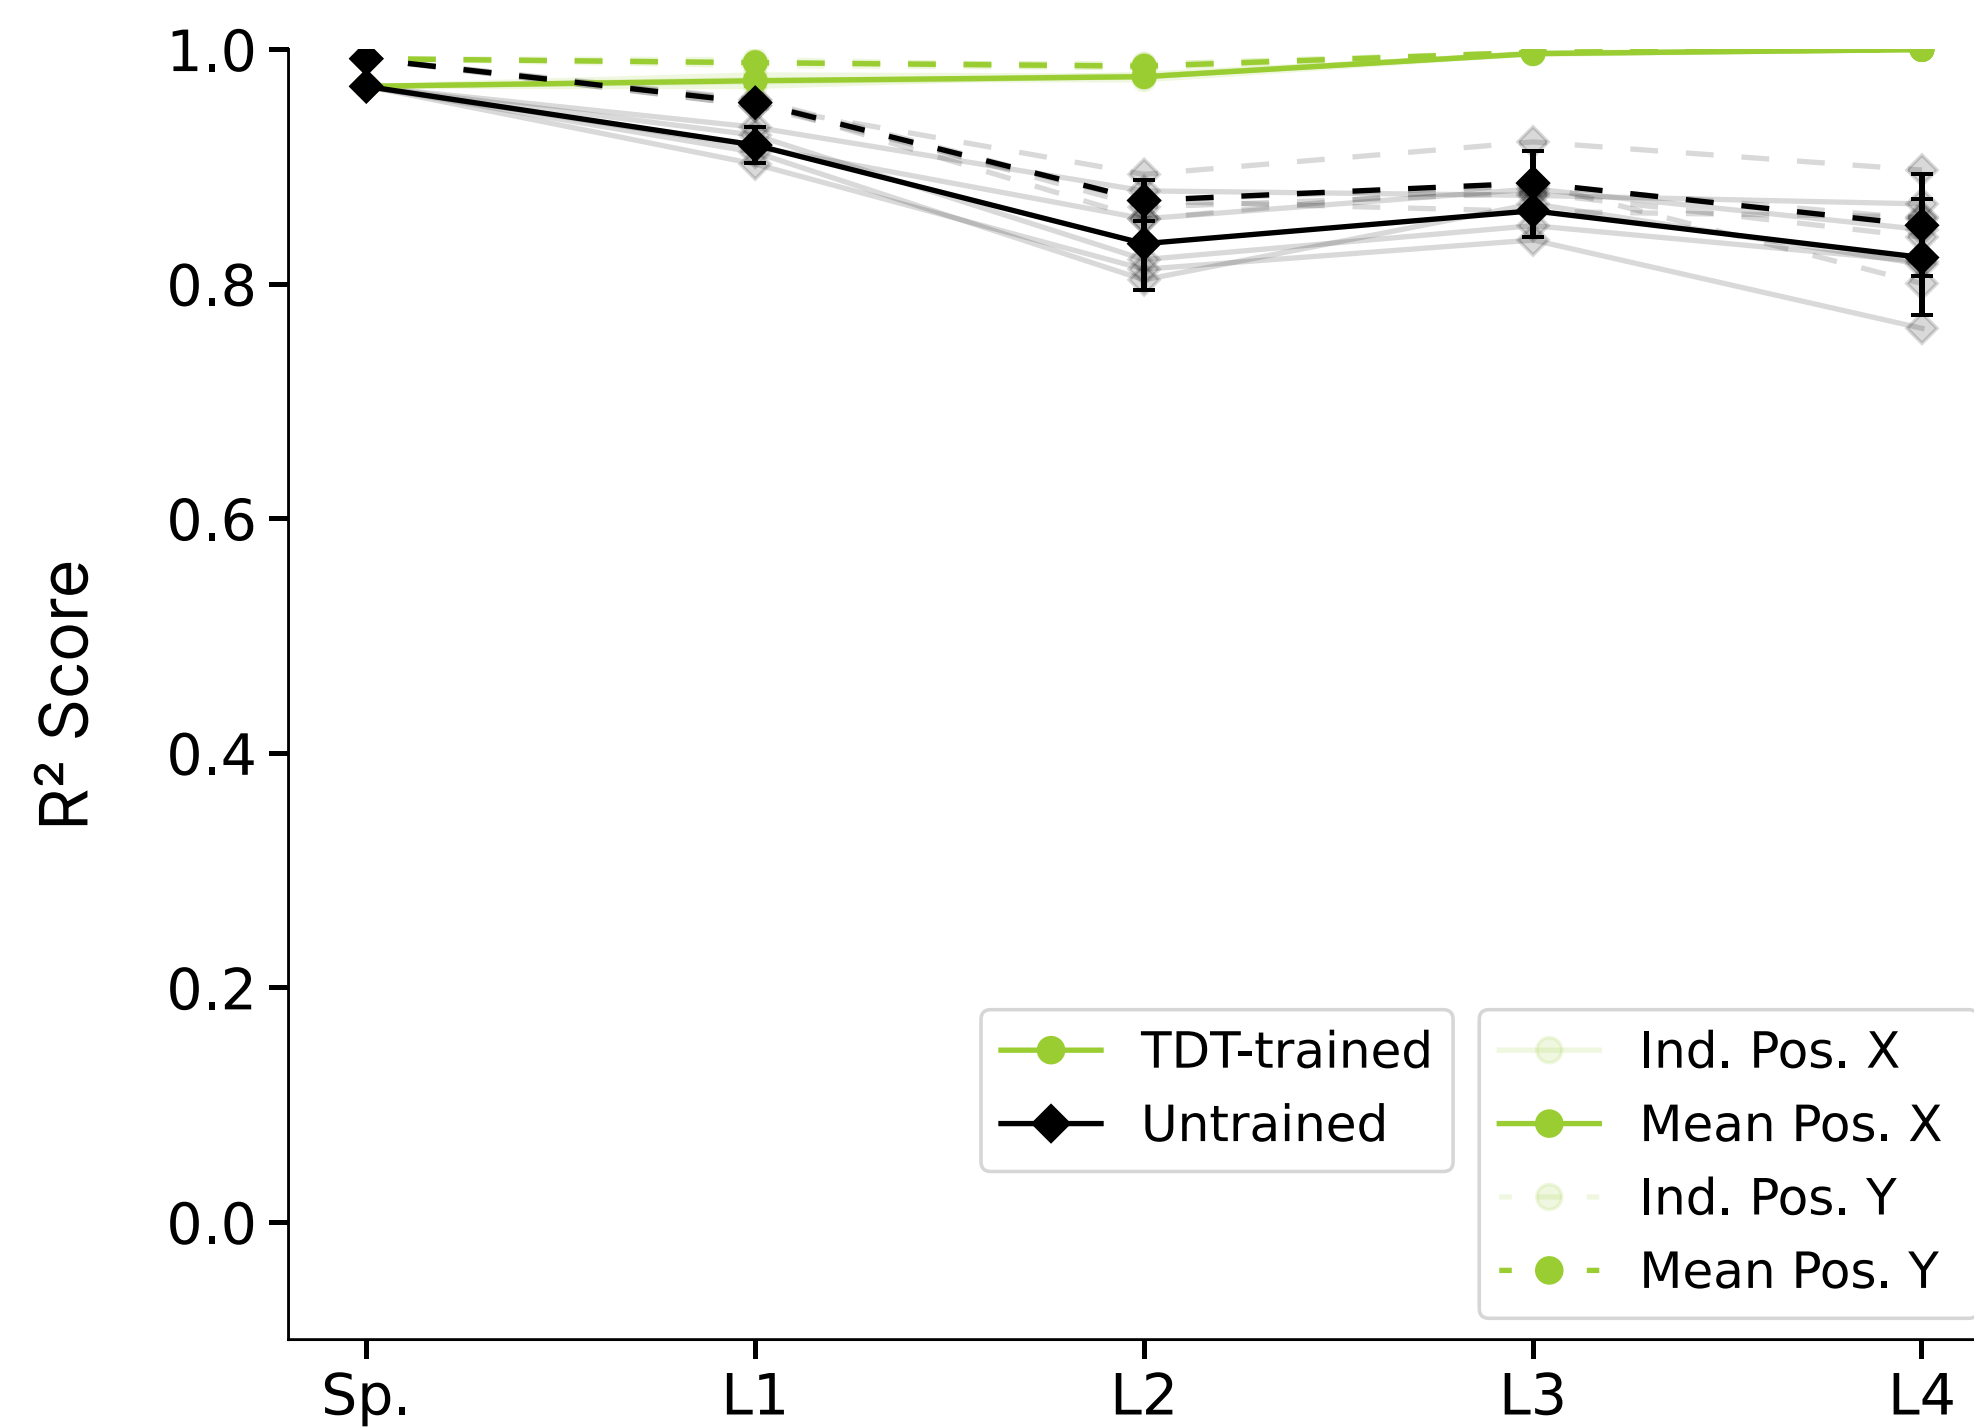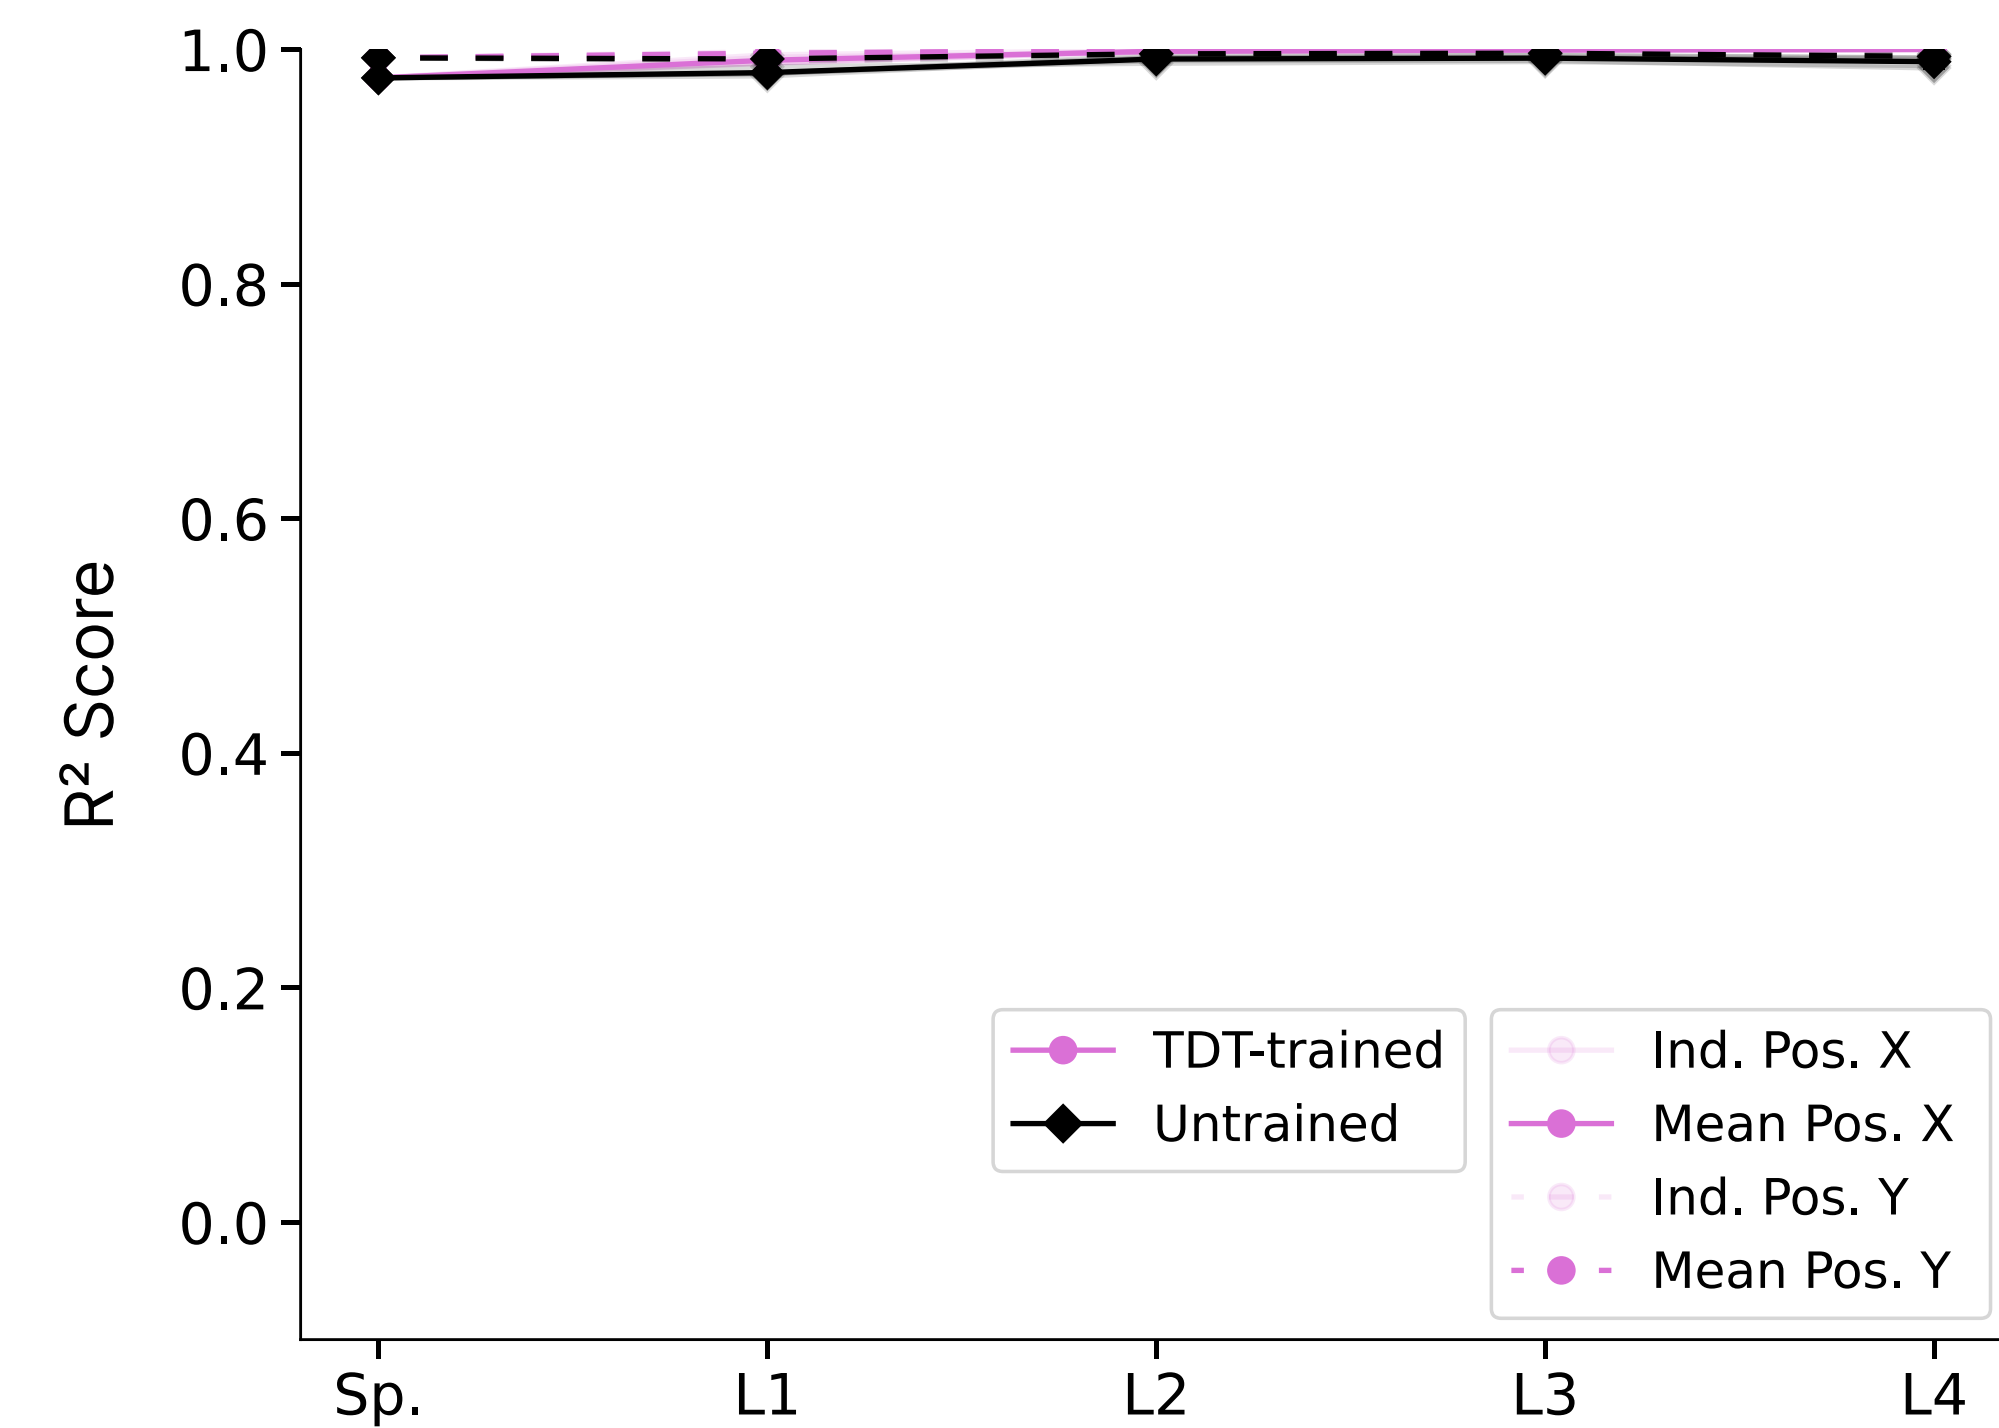

Supplement: supp [file elife_poa_e81499_Figure_6_figure_supplement_2.pdf › elife_poa_e81499_Figure_6_figure_supplement_2.pdf]
